# Supplementary material for: Cellular assays identify barriers impeding iron-sulfur enzyme activity in a non-native prokaryotic host
Source: eLife. 2022 Mar 4;11:e70936. doi: 10.7554/eLife.70936 (PMC8896826; doi:10.7554/eLife.70936)
Supplement: Supplementary file 1. — Complementation results indicated with minus (-): negative complementation; plus (+): positive complementation; (+/-): growth detected but substantially slower than with E. coli ortholog; N.A.: not analyzed. [file elife-70936-supp1.xlsx]

## Sheet: Preliminary screen
Supplementary File 1. Orthologs used in preliminary screen and complementation results.
IspD orthologs
Organism Name	Complementation Results	NCBI ID	Nucleotide sequence
Acaryochloris marina	+	WP_012164325.1	ATGCATCTGCTGATCCCGGCCGCGGGTATGGGCCGCCGAATGGGCTCCGACCGCAATAAACTGCGGCTCATGCTTCACGGCAAACCGCTCCTGGCGTGGACACTCTTGGCGGCCGAATCCAGCATTTCCATTTCATGGATCGGGATCATCGGTCAACTGGAAGACGAACCGACTTGGGAGACGTTGCTGAATACCCTCTCCCTAAACAAGCCCGTGGTCTTTATCGAAGGCGGCCAGACTCGTCAGGAATCGGTTTATAATGGCCTGCAGGCGCTGCCACCGGAAGCGGAACAGGTACTGATCCATGATGGTGCTCGCTGTTTGGCCACGCCTGAACTGTTGGACCGTTGTGCGCATGCACTGCACAAATACCAAGGTTTCGTGGCAGCGGTCCCGGTG…
Aeromonas hydrophila	+	WP_011704771.1	ATGACTGATCTCCGTCCTGGGCTCACAGCCATTGTTCCGGCAGCCGGCATCGGAAGCCGTATGGGCGCGGAGTGCCCGAAACAGTATCTCCAACTCGCAGGTCGCACGATTCTGGAACATACATTGACGCGCCTTCTGAGCCACCCCGCGATCGCCCAGGTGATCGTTGCCCTTGCGCCGCATGACCGTTGGTTTGATACTTTAGCCGTAGCAGCCGACCCCCGCATTCTGCGTGTCGAGGGTGGTGCGGAACGTGCGTTCTCTGTGCTCAATGCACTGCACGTAGCGGCGGGGGAGTGGGTCCTCGTGCACGATGCAGCACGCCCGTGTTTGACGCACGGGGACCTGGATGCGCTGATAGCAACCGCCATGGCGTGCGATGGCGCCATTCTGGGCTCG…
Akkermansia muciniphila	+	WP_012419128.1	ATGAAATGTTGCGCGGCAATTATCGTCGCGGCGGGTAGCTCGCGCCGTGCCGGCTTCGATAAACTCCTGGCCCCCCTCCATGGGGTGCGTGTATTGGAGCGAAGCATCCGTGCATTTGCGAACTGTCGCGAAATTACAGAAATTGTAGTGGTTTGTCCGGAGGAACGTTTCCACGCCATCAACGGTGCGAATCTAGAGACCGAGATTCCGGTGACACGTGTTGATGGTGGCGCAGAAAGACATGAATCCGTGCAGAACGGACTTGCAGCGTTACTCTACACCCCGGAGTTTGTAGCCGTGCACGACGGTGCGCGTCCACTAATCACGGTAGAACAAATTAGTCGTTGTATCCAAACCGCACGCGAGTATGGGGCGTCGGCTAGCGCCCACCCCGTCACG…
Arthrobacter sp.	+	WP_011690593.1	ATGTCGGCGCGCGAATCTAGCGCTGTGAGTGGCCCTGAATCTGGCGATCATGGCCCGCGTCCGGTGGTCGCAGTAGTGCTCGTAGCGGCGGGGAGCGGTCAGCGTCTTGGCTATGGAATGCCTAAGGCCCGCGTGCCCCTTGGTGGGGAGCCGATTCTCATGCATGCACTGCGTGGTATCGTGACATCGGGCGTGGCCCAGCAGGTGTGTATTGCACTCCCGCCGGGGGATGGTGCCCTGAGGCAAATGTGTGAAGACTTCAAAGGGGAATTAGCGGACGGAGGACCTCTGCTGACGATCGTCGATGGTGGCGCAACTCGTACGGAAAGTGTGCGCTCCGCCTTGGCCGCACTGGAGGAGGGGACTCAGGCGGTTTTGGTGCATGACGCGGCCCGCGCG…
Arthrospira maxima	+	WP_006625132.1	ATGTACTTGCTGATTCCGGCTGCCGGCAGTGGTCGTCGCATGGGCGCCTCCTGTAATAAACTGCTCTTGAAGCTGCTGGATCGCTCGCTTCTGGGTTGGACCTTAGCAAGCGCTGGCGCATCCAAAAGTATCATATGGATTGGTATCATCGGGCAGACGGCGGACTTCCCGGATTTCAAAGCCATTGTCGATGAAGTATCACTCAACCTGCCAATCAAGTTCATCATTGGCGGTGAAACGCGTCAGGAGTCTGTGTATAATGGCCTGCAGGCACTGCCCCCGGAGGCGGATCGCGTCTTGATTCACGACGGGGCGCGTTGTCTGGCCACGCCGGATCTCTTCGATCGCTGCACGAAAGCGCTAGAAAGCGTTTCGGGTCTGATTGCAGCGATACCGGTA…
Azoarcus sp.	+	WP_011765415.1	ATGCAGAACTTTCACCCGAGGCACTTTGCAATTGTTCCGGCTGCAGGTTCCGGCAGCCGCATGGGTTCGGAACGTCCGAAGCAATACCTGCCCCTGCTGGGTAAACCGCTGATCTATCATACCCTTTCTGTCTTGTGTGCGGCGCCGGAGATCGACAAGGTGTTCGTTGTGCTGAGTGTTGGCGATGCAGAGTGGGGTCGCCACGACTGGCGTGCGCTCGGCCCGAAGTTAGTGCCGCTCTTTTGTGGGGGTCCGACGCGCGCCGACTCTGTTCTGGCTGGGCTGCGAGCTATTGCGGGGGAAGCAGTCCAGTCGGATTGGGTGCTCGTTCATGACGCGGCTCGCCCGTGTTTGGCACCGTGGCATATCGACAAATTAGTCCGCGAATTAGCGGGTGAT…
Bacillus subtilis	+	NP_387971.1	ATGTCTTATGATGTGGTTATCCCTGCGGCCGGTCAGGGTAAACGTATGAAAGCCGGCCGTAACAAGTTGTTTATTGAACTCAAAGGTGACCCTGTAATTATCCATACTCTTCGTGTGTTTGATAGCCATCGACAGTGTGACAAAATTATTCTGGTCATCAACGAACAAGAACGTGAGCATTTCCAGCAACTGCTGTCAGATTATCCGTTTCAGACATCGATCGAATTAGTTGCCGGAGGGGACGAACGTCAGCACTCCGTGTACAAAGGCCTCAAAGCAGTGAAACAGGAAAAAATCGTGCTGGTCCACGATGGAGCGCGCCCCTTCATCAAGCATGAACAAATCGACGAGTTGATCGCCGAAGCCGAACAGACGGGTGCCGCCATTTTAGCGGTGCCG…
Blastopirellula marina	+	EAQ78435.1	ATGCCGGTTAGGAACTTTGGCGTCATCCTGCCTGCGGCCGGTCGTTCAACCCGGTTTGGTGATCCCCGTCAAAAGAAAGTTTATGCGAGCCTGGCCGGCGAAGCGGTGTGGCTCCATTCAGCAAAACGCTTTGCGGCGCGTGACGATGTCCGTCAATTAATTGTAGTGATCTCTCCGGAAGACGAAGAAACATTCCGCGCAGACTATGCAGTGGATATTGATCGCTTGCACCTGAGCATTGCCCTCGGAGGTGCGGAACGTTCCGACAGTATCGCCAACGCACTGGCGCTCGTCGATGAAGATATCGAAATGATAGCCGTTCACGATGCCGCACGCCCTTGCATTTCCGACCGTCTCATCGACAATGTCTTTGCGGCAGCCATCGAACATGGCGCAGCG…
Cellvibrio japonicus	+	WP_012487823	ATGTTCTGTTGGTTTACAGTGCTGGTTGTCGGCCCGAATCCGATGTCTTCATCTAGCTCCATTCTGGCCCCTGTTTGGTGCGTCGTTCCGGCCGCAGGCGTGGGGGCTCGCATGAAAGCCGGCTTCCCGAAACAATACTTAAAACTTCAGCACAAGACGATCCTGGAACATACGCTTGAACGACTGCTCGCACTCCCTTATGTCGCAGGTGTTGTGCTGGCTTTACATCCGGATGACGACTACTGGACGACCTTGCCTATCTCTCGTGACCAACGTATTTCCTGTGTGGATGGTGCAGTGGAACGCGCAGGCTCTGTTCTGAACAGCTTAACGTGGCTGGAGGATAACGGCCACTCTGATGCGTGGGTGCTGGTACACGACGCCGCACGACCGTGCGTG…
Chlamydia caviae	+	WP_011006134.1	ATGTACATGGATCCAAAATGTTCTCTGATTCTGCTGTCTGGCGGGAAGGGCGAGCGATTTGGCGCGAACCAACCAAAACAGTATCTCCCGTTTCAGGGTGAACCGCTCATTTTGCATGCCCTGAAAACGGCCTTGCACATCCCAGAAATCACCGAGGTGATTGTGGTCTGTGACGTATCTTACCGCCATATTTTCGAAGGTTTCCCGGTCAAATTCGCAGAGTCTGGTAAACGCCGTCAAGATTCAGTGTTCAGCGGTCTACAGCATGTCTCTAATCCGTGGGTGCTGATTCACGATGGCGTTCGCCCGTTTATCTATCCAGACGAAGTGACTGAGCTGATTGCCGTCGCGCAGCAGACCGGTGCCGCCACATTGGTAAGCAACGTCCCTTATACCATC…
Chlamydia pneumoniae	+	WP_010883217.1	ATGATCAAATCGTCCTTGATTCTCCTCAGCGGCGGCCAGGGGACTAGGTTCGGAAGCAAAATCCCGAAGCAGTACCTGCCGTTGAACGGAACCCCTCTCGTCTTGCATTCTCTCAAAATTCTCTCGAGCCTGCCGCAAATCGCGGAAGTGATCGTTGTGTGTGACCCGAGTTATCAGGAGACGTTCCAGGAATATCCTGTATCTTTTGCCATCCCGGGTGAGCGCCGCCAAGATTCGGTCTTCTCCGGCCTGCAGCAGGTATCGTATCCTTGGGTTATCATCCATGATGGTGCGCGCCCGTTTATCTACCCGGACGAAATCCACGACTTACTCGAAACCGCCGAGAAAATAGGCGCAACAGCATTGGCAAGCCCAATCCCGTATACCATTAAACAACGT…
Chlamydia trachomatis	+	NP_219975	ATGAACCTGTCCTGTAGTTTGGTGCTGCTCGGAGGGGGGAAAGGTGAACGTTTTAACAGTCTGCAGCCTAAGCAATACACCCACCTCTGTGGCGAACCGCTGATCTTGCATGCGCTGCATGCATATCAGCGTCTACCGTTCGTACAGGAAGTCGTTGTCGTGTGTGAGGAACAGTATCGCGAGCTGTTCCTGCCGTATTCTGTGAAATTCGCCAGCCCTGGCACCCTCCGTCAGGATTCGGTTTTCTCTGGCTTGCAGCAAGTAAGCACGCCATGGGTGTGTATCCACGACGGAGTGCGTCCTTTTGTTTACGCAGATGAGGTGATTGAGGTGTGTTCGGCCGCACGCAAGACGGGTGCCGCGGCACTCGCGTCTCCGGCTACATATACGATAAAAAGC…
Chromobacterium violaceum	+	WP_011134812.1	ATGATCGCTTTGGTACCGGCAGCGGGTTCGGGCTCCCGTTTCGGGGCCCCGTCGCCGAAACAATATTTGCAGCTCAATGGGAAGCCATTGATGTGGCATACGCTCGCAACGGTGGCCGCCGTTCCTGACGTGGATGAGGTGGCAGTTGTGATTTCTCCGCAGGATGAATGGTTTGACGATTTTGCGTGGGATCTACCGAAACTGTCTGTTCATCGCGTGGGAGGGGCGTCACGTGCCCAGTCCGTCGCCTCCGGTTTGGCCGCCCTCGCATGTGCAGACGATGACTGGGTACTGGTACACGATGCCGCCCGATGTTGCCTGTCGGTGGCCGCAGTAGAGCGTTTAATCGCGGCACTCTCTGGCCATGCTGTGGGAGGCCTCCTGGCTCTGCCGGTTCCC…
Chthoniobacter flavus	+	WP_006982014.1	ATGGTGTCCGCCATTATCGTCGCTGCAGGTTCATCGCGACGTATGGGATTCGATAAACTGTTTGCCCCGCTCGCCGGGAAGCCCGTGCTCTGGCATAGTATCAAAGCCTTTAATGATACCAAGGAAGTTGACGAAATCCTGATCGTAACGAAAGATGATCGCATGGACGAGGTGGAAGATCTCGTCAGCAAAAGTGGCCTGGTTAAAGTCAAAAAAGTCATCTCAGGTGGCGCTGAGAGGCACATTTCTGTTTGGAACGGTCTGCAGGCCGTGGACAGTCAGGGAAGCGAATATATCGCAATCCATGATGGGGCGCGTCCGCTGGTCACGCCGAAACTGATTAAAGCCTGTCTGGATCTCGCAGAAACCCACGGTGCCGCGACATGTGCCTCCCAGATC…
Colwellia psychrerythraea	-	WP_011041910.1	ATGGCATCGACGCTGAAGTTCATTGTCATCGTGCCGGCTGCCGGTGTAGGCAAACGCATGCAGGCCAATTGCCCGAAACAATACCTGCGTATTAACAATGAAACGATCCTGTCTCATACGGTCATGCGCCTCCTCTCTCATCCGCTGATCAGTCAGGTGATTGTTGCCTTGGGGACCGAGGATCAATATTTCGCTGAATCGGAACTGGCGCACCATAAAGACATTATCCGTGTGAACGGTGGGACGGAGCGCGTTAATAGCGTGCTGAATGGTCTTAAAGCTGTTGATTCGGACAAATATCCATGGGTACTGGTCCACGACGCCGCGCGCCCGTGTGTTTCGCATCAGGACATCGACAAACTGATTACGCGCTGTTTGCGTAAAGACTACGGCGGTATC…
Coraliomargarita akajimensis	+	WP_013042185.1	ATGAACGCGCTTATTCTTCTGGCGGCCGGGTCCGGTAGCCGTATGCAGGGTGCAGTGGACGACAAAGTTTTAACGCCGCTGTATGGCAAACCGGCCTTTTTGTGGGCACTGGAAGCCTTTAAACAATCCGCCGTGATCGAACACGTTGTTTTGGTCACCCGTGATGACGAACAGGCAGGGGCCATTCGCAAGCTGCTGAGCAAAGAAAGCCTGCCGCTGACATTCGTCCACGGCGGTAAAGAGCGCATGGACTCGGTTTCTAATGCACTGGAGGCCCTGCCAGATGGGTGTGACTACGTATTCATCCACGACGGTGCACGTCCGCTGCTGCAGCCGGAGACGCTTCTGAAATTGCGAGATGCCGCCATCCGCGACGGCGCGGCTGTGCTGGCACATCCG…
Crocosphaera subtropica	+	WP_009547138.1	ATGTACTTGCTGATTCCGGCCGCCGGTATGGGCAAGCGTATGGGTTCGAACCGTAATAAACTGCTGCTCACGCTGCTGGGCAAGCCGCTGCTCTCGTGGACCCTGCTGGCGGCCGAGGCTTCACAAAAAATCGAGTGGGTGGGGATTATCGGACAGCCGTATGACTTTCCGGAATTTAAAACGATTTTGACCACGATATCGTTTACAAAGCCAGTGGAACTCATCCAGGGGGGAGAAACGCGACAGGCCAGCGTCTACAACGGTTTGCAAGCGCTGCCGAAGGCAGCGGATAATGTGCTCATTCATGACGGTGCCCGCTGCTTGGTCACGCCTGATCTGTTTGACCGTTGTGCAGAGGAACTGCTCACCTGCCAGGGTTTGATCGCCGCGATTTCGGTA…
Crocosphaera watsonii	+	WP_007306851.1	ATGTACTTGCTGATCCCTGCCGCAGGCATGGGTAAACGCATGGGCAGCGAACGTAACAAGCTGTTGCTGAATCTCCTTGGTAAGCCGCTCCTGTCGTGGACGTTGCTCGCTGCGGAGACCGCCCAGAAAATTGAATGGATCGGTATCATCGGCCAGCCGTATGATTTTCCGGAGTTTAAAAACATTTTGGAAAATATTTCTCTCAACAAGCCGGTCGAGCTGATTAGCGGAGGTGAGACGCGTCAACAGTCGGTGTATAATGGTTTGCAGGCCCTCCCTAAAGAAGCGGAAAACGTGCTAATCCATGATGGCGCGCGCTGCCTGGTAACCCCGAACCTGTTCGACCGTTGTGCGGAAGAGCTGCTGAATTGTCAAGGGTTGATCGCCGCAATTCCGGTG…
Deinococcus geothermalis	+	WP_011529331.1	ATGACGAGCGTTTGTTTCCTGGCCGGGCGAACCGCTGCCTTGATTCCCGCGGCAGGTTCTGGCACCCGTTTGGGGCGTGGTCCTAAAGCCTTCGTCGAGGTTGCCGGGCAGAGTCTTTTGGCACGCTCGGTGGCGGCACTTGCGCCGTGGGTCGATGAAGTACTGGTTGCCTTACCCGAAGGTTTCCCGCTTCCGCCGGGTTTACCAGCGCAAGCCATCCTGGGCGGGACGACGAGGCAGGAGAGTGTATGGCGATTGCTGCACGCTACCACGGCGGACGTTGTGCTCGTGCATGATGCTGCGCGTCCGTTCCTGCCGGGCGCAGTTGTCACTGCGCTCCTGGAAGCCGTGTCCGAGACGGGAGCGGCCACGGCGGCTTTGCCTGTTGCCGATACTTTA…
Desulfitobacterium hafniense	+	WP_015942744.1	ATGGTCAAACTGGGAGTGATCATCCCGGCAGCCGGTCAAGGCAAACGTATGGGGGCCAGCGTTAATAAGCAATTTCTGCCGTTGCAAGGACGTCCGCTGCTGGCCCATACCCTGAGCCTGTTTGAACGCTCAGGTGCAGTGGCGGAGATTGTGATCGTGTCTGCCAAAGAAGATCGTGAACGTATCGCAGAGTTAGTACGCACGGAGGGCTTCCAGAAGGTGTCCGCGATCGTTTTGGGGGGTGAAGAGCGCCAAGAGAGCGTGTTTGCCGGCGTCAAGGCATTAAGCAGTCTGATTCAACGTGTAGCGGTGCACGACGGTGCTCGCCCACTGCTGACCTGCCTAGAGCTGAACCGTTTCTTTACGGAAGCGGAGAAATTCGGCGCAGCGATTATGGCC…
Gemmata obscuriglobus	+	WP_010052410.1	ATGAGCCAGTTTGCGGTGATCATTCCTGCGGCAGGCCAATCGTCCCGTTTTGGTGGCGCCGAAAAAAAACCGTTCGTGGCCCTGGACGGACGTCCGGTCTGGTTACGCAGCGCGGAAACCTTTTGGGGCCGTGACGATGTGAGTAAAGTCTACATTGTCGTGGCCCCGGCCGACCGCGATGACTTCCGTGCGCGGTTTGGTCATCACCTCGCCTTCACGAATGCGGAGTTGGTGGAAGGTGGCTCGGAACGCTTCGAATCTGTTGCCAATGCCCTGGCGCGTGTGCCTGAAAGCGTGCCGCTCGTAGCGGTTCACGACGCGGTTCGCCCTCTCGTCACACCGGCCCTCATTAACGCTGTAGTCCAGAGTGCGACGGAACACGGGGCAGCCATGCTGGCA…
Geobacillus thermodenitrificans	+	WP_008882046.1	ATGAACTACGAAGCCATTGTGCTGGCCGCAGGCCAGGGGAAGCGTATGAACGCAGGGATGAACAAACAGTTTATCGAACTCGGAGGCGAGCCGCTCATCGTGCGTACCCTGAAAGTGTTTGATGGTGATGAACGTTGTAATGGCATCGTTCTCGTGGTGAACCCGACGGAACGTGGTCAGTTTGAGCAACTGTTCGAGCGCTATCGTATTCGTAAGGTTGTGGCTTTTGCAGACGGGGGCCAGGAGCGCCAGCATAGCGTCTACAATGGACTCCAGGCCCTGAGGTCTGGTGAAATCGTCCTAATCCACGACGGCGCTCGCCCGTTCGTACGTATCCGCCACCTTCACGAATTGGCCGACGCCGCCGTGCAATATGGTGCCGCCATCCCGGCCGTCCGC…
Heliobacterium modesticaldum	+	WP_012282447.1	ATGTCGAAGGATGATTGTGCCGTCATTGTAGTGGCCGCGGGCCGTGGTAAACGCATGGGTGCTGGCGGTAACAAAGTCCTGCTGCCGCTGGCCGGTCAGCCGGTACTGGCTTGGACTCTCCAAGGCCTGCTGGCCCATCCGGATCTGGGCCCGTTCGTGCTGGTGATTCACCGCGATGATGCGGTGAAGATGAAAGAGTTGTTGGCGCGCTACCGCTGGTCCGACCGTGTCCGCCTTGTGGAGGGAGGCGACGAAAGGATTGATTCTGTTTGGAAAGGCCTGCAGGCACTCGCGTCCGAAGATTGTCAATGGGTGGCAGTGCATGATGGTGCCCGCCCTCTCTTCACCCCGGCTCTGCTCTCGCGCTGCATCCAGAAAGCTCGCCAGCATAGATCTGCC…
Herminiimonas arsenicoxydans	+	WP_011871385.1	ATGACCTTGCCGCGTTATTTCGCACTGATTCCGGCAGCGGGCATCGGGGCACGCATAGGAGGTAGCACGCCGAAACAATATGTTTCTATTGCCGGGAAAGCAATGCTTCGTCATGTTCTGGATACGTTCAGCGATACCGTCGCCATTTCCCACACGTTTGTCGTAGTCTCCGCGGAAGACGGGTATATCAACGATATTATGGCCGAACCGCCTGATCACCACGCTGGTATCACGGTGCTGCGCGTGGGTGGCCCGACGCGCCAACTCTCGGTGCTGAATGGTCTGCATGCCGCACGCGAGTGGATTGGTGACGATGACTGGGTGCTGGTACATGACGCAGCGCGCCCGGGCCTCAACGACTCTCTTGTGGATAAGCTGATCCAGACGCTCAAGGACGAT…
Isosphaera pallida	+	WP_013565968.1	ATGCGTGATATTGCCCTAATTCTGCCGGCAGCGGGCCGTTCGACGCGATTTCATGCGGGTCGTCATCCAGAGACAGCACCGCTCGATACGCATGCTTTGGATGATCTGCCTCCGCGCAAAGTATTCCTCGATCTGGACGGTGCAGCAGTGTGGGTGCGCACGCTAACGCGTTTTGCGAATCGTCCGGATCTGGCCCGCGTTCTGGTTGCGGTCTGCCCGGAAGACCGCTCTGCCTTCGAGCGACACTTCGCGATCCCGTTAAAAACTTTCGGCGTGGAAGTGGTCGAGGGTGGTGCTGAACGTTTTGAGACCGTTGCCCGCGCGCTTGATCACCTGCGCGACGATCCAACTATCGCTTTGGTAGCCGTCCACGATGCCGCGCGTCCGTGTGTGCCACCG…
Jannaschia sp.	+	WP_011455356.1	ATGGAAAAGCCTGCACAGCGTGCAACCGCAATTATCGTTGCGGCCGGCCGCGGCATTCGTGCTGGAGGTGGCGAACCGAAACAATGGCGTCGAATCGCTGGGCGCTCCATCGTAGAGTGGTCTGTGAACCGCTTCGCCGCGCATCATGCCGGTTTCGATGTGGTCCTAGTTATTCACCCGGATGACGAATGGCGGCTGAATGGTCTGGATCTGCCGACGACGCTCCGTGTGGTTCATGGCGGAGATTCGCGTGCGGCGTCGGTCAAAGCAGGTCTGGCAGTGTGCTGTGACGCGGGCCACGTTCTGATCCATGACGTCGCGCGCCCGTGTGTAAGCTTAGCCGTGATTCAGAGTGTGCTGGATGCGACGCGCGCCGGGGGCGCGGCAGCACCGGCTCTG…
Jonesia denitrificans	+	WP_015772341.1	ATGAGCAAGTTGGACGTTGGCTCGCGTCGCCATGTGGTTGGGGTCGTGACGGCGGCTGGCTCCGGGCAGCGTCTCGGTTACGATATTCCAAAGGCCCTGGTGGAGCTCGTACCGGGCCAAGCCGATACAGCACTGGTTGTTATGGCGGTTAATCGCATTGCTCAGGTGACGGGTATGCAGCGAGTCGTGGTAACCGCGCCTGATACTCACGTGCGCCAGGTTAAACAGCTGCTGTGCCAGCACGGGCCGCATCACGTTACCGTGGACGTCGTATCAGGTAGCACAACTCGCCAAGCGAGCGTGGCCGCGGGCCTGGCGGCTCTGGCCGCACATCATCCGCCCGGGGATGCGGGGACGGAACGCGTGGTTTTGGTACATGACGCCGCCCGCCCGCTCACC…
Magnetospirillum magneticum	+	WP_011384759.1	ATGGCCAAAACCGTTGTGCTGGTAGTAGCAGCTGGCCGCGGACGGCGTTTCGGTGGCGATTTGCCGAAGCAGTACCATGACCTCGCCGGCCGCATGGTGCTACGACACACCCTGGCGGCCTTTGCGACGAACCCGGAGATAGGCGCGGTGCGTGCCGTGATCCATCCGGACGACCGCCAACTGTACGATATGGCGGCCGCGGGTCTGAATCTGTTAGAGCCGGTACATGGCGGTGCCACCCGTCAGGACAGCGTGCGCCTGGGGTTAGATAGTCTCAAAGACCTGAATCCGGATAAAGTGCTGATTCACGACGGCGCGCGCCCATTCATTGACCACGGGACGATCGGACGTGTTATTCGCGCCCTGGATCGTCACCCGGGTGCCCTGCCGGTAGTGCCG…
Methylacidiphilum infernorum	-	WP_012463124.1	ATGAACGTTGCGATGGGCAGTATCCTCGTCGCAGCAGGCCAGTCTCGTCGCATGGGGTTCGATAAAATTTTCAAGGCATTTAGCAACGGCTTTTGCCCGCTGGAGATCTGTCTCTGCCGTATTTCACGTTCTCCGCTGGTGGAACAGATAGTGGTTGTAGTGTCTAAAGAAAATGTGGAAAAAGCCAAAGGTAAAATTAGCACCCTGAGCCTCGACAAGGAAATCACCGTAGTGGTAGGCGGCAAAGAACGCCAAGATTCGGTGTACCAAGGTCTCCTTGCGCTAGACCGTAAATGTCGCTATGTAATGATCCATGATTCGGCCCGCCCGTTCATTAACGAGGAACTGATTGAAAAAGTGTATCAGGCAGCGGTAGAAGTGGGCGCGGCTGTTTGCGGT…
Methylobacillus flagellatus	+	WP_011479338.1	ATGCCGCCCATGTCGAAATTTCATGCCCTGATTCCAGCGGCCGGGACGGGTTCTCGAATGGGCTCCAAGCTGCCTAAACAGTATCTGCCTCTAAATGGCAAGCCGCTGATTTTTCATGCCCTGTCGTTATTCGCAGCAGCGCCGCGTATCTCAGCCGTTCACGTAGTGATCGCTCCAGACGATCATCTCTGGGCGCAATACGGTGCAACTGGCTTGGACGCGAAAGTGGTCGTTCACGCACTGGGAGGTGCTACACGCGCCACGACGGTGTTGAATGGCCTGGAAGCGATGGTTCATCAAGTGGCCGACGATGACTGGATCCTCGTACATGATGCGGCACGCCCGGGTCTTTCGATGGCGATGCTGGACCGTCTGCTCGACTCCGTGCAGGATGACGCA…
Moorella thermoacetica	+	WP_011393964.1	ATGCCGTTTCTCAGTATGATCATTGCTGCCGCGGGTCGCGGTCGTCGCCTGGGGCGAGAGGTGAATAAAGTGTTCCTGCCGCTAGCTGGAAAACCTATGCTCGCCTATAGCCTGGCGGTAGCCGTGGCCAGCCCGCTGGTGGACGAAATTATCATTGTTACCCGTCCGGACGACATACCGCTGTGTCGTCAAGTGGTCGCCGGTGAAGGTGCAGGTAAGGTCAAGGCAATTGTGGCCGGTGGAGCCGAGCGCCAAGATTCTATCGCAGAAGGCTTGAAAGCCGTAGCCCGTGCCGCGGAATGGGTGGCCGTCCATGATGGAGCCCGCCCGTTTCTGACACCGGCCCTTCTCGAGAAGACGATCTTGGCGGCACGTAACACCGGCGCAGCAATTGCTGCC…
Mycolicibacterium smegmatis	+	WP_011731019.1	ATGGCCACGGTGGCAGTAGTGCCGGCTGCCGGTTCGGGGGAACGTCTGCGAGCCGGGAGGCCTAAGGCATTTGTGACGCTCGGGGGTACGCCGTTACTGGAACACGCCCTGTCCGGCTTGCGCGCTTCAGGAGTGATCGATCGTATCGTCATTGCAGTGCCACCGGCCCTGACTGACGAATCGAAATTGGTGTTTGGTGGCGAAGATTCGGTCATCGTAAGTGGCGGCGTAGACCGCACCGAGAGCGTGGCGCTGGCCCTCGAAGCGGCAGGGGATGCCGAATTCGTCCTGGTGCATGACGCCGCCCGGGCGCTCACACCGCCGGCATTGATCGCGCGTGTTGTCGCAGCACTTAAAGAAGGCCATTCGGCTGTGGTGCCGGGACTCGCACCGGCGGAT…
Nostoc punctiforme	-	WP_012408535.1	ATGAGCAACATCGGTCTGATCATCCTGGCCGCAGGTGCATCCACCCGTATGGGGACGCCTAAACAGCTTTTACGCTATGGCGAACAAAGCCTCATTGGCCATGTAGTGCAGGTTGCCAACGCGAGCGTGTGCCACCCGATCATCGTTGTGCTGGGCAGCTACGCAGAACGCATTAAGCCGGAAATCAACAGCGAACAGGTGCACATTGTGGAAAATCCTCTGCTGTCGGAAGGGATTAGTACGAGTATTCGCGTTGGCATTGAAGCCCTCAACATCATTAACAAAGAGGCAAAAGCGGTGGTACTGATGGTGTGTGACCAACCGTTCATCAGCCCACAACTGATCAATCAACTAGTCGAAGTACACGAGACCACGCTGAAACCGATAGTCGCGTCTCAG…
Pantoea ananatis	+	WP_013026919.1	ATGAATAACCGCAGCCATAGTGCAGACGTGATTGCCGTCGTGCCGGCGGCCGGCATCGGTAGCCGTATGCAGGCAACGTGTCCGAAACAGTATCTGACGATTGGCCAGCACACCTTACTGGAACACTCCATCGCTCGCCTCTTTAGTCACCCGGACGTATCACAGGTGATTGTTGCCCTCAGCCCCGACGATCGTCATTTTGCAGCCCTGCCTCTCGCTGACGATCCGCGCGTGATCTGTGTGATTGGGGGCGACACGCGGGCGGAATCTGTGCTAGCCGGGCTCCAAGCGGCCCAAGGCGCTTCCTGGGTTCTCGTTCATGACGCCGCACGCCCGTGTCTGCATCCGGATGACCTTGACCGCCTGCTTCAGCTCCGTGAAACTAGCAAAACGGGTGGC…
Pelagibacter ubique	-	WP_011282059.1	ATGAATAGCTGTTTTATCATACTCGCCGGGGGAGAATCCAAACGTTTTAACTCGAATACGCCGAAACCGTATACCAACTACAAAGGCAAACCGCTGCTCTTACACAGCATTGACAAAGCGAAAGTTTTCAATAAATTTAATAAAATCGTCTTGGTGGTTAATAAGAAACATAAGAACTTTATCAAAAAGCTCAACATCAAAAATATTCGCATCATTACAGGTGGTAAGACGCGTGCAGAATCTGCTTATAATGCCCTTAAGAGCATCAAAGAAAATAATTTCAAGAACGTGATTATTCATGACGCAGCCCGCCCGAATTTTAGTCTGAAACTCCTGAACAAACTGATGAACGAATTGAAACTGAATGATTGTGTGATCCCAGCCATCCAGACAGCAGAC…
Pirellula staleyi	-	WP_012911607.1	ATGTCGTCTTTTACGGAAGTTATCGCCGTGGTCTTAGCAGCCGGCATGGGCACTCGTATGAAAACGGACCTGCCCAAGGTGTTATGCCCTGTCCTGGGCCGCCCAATGATTCATTTCGTTATCGATGCGTTAGAACAGGCCGGTGTGACTCGGGTCATCGCGGTGGTCGGCTACAAAGCAGACGATGTGAAAGCAGCCTTGTCCTCTAGACCGATGGTGGATTTCGTGCTGCAGACCGAACGTCTCGGCACGGGTCACGCAGTTAAGATGGCACGTGAGCTGCTGGAAGGACACGTGGGGCCAGTTGTGGTCGTGGCGGGTGACAGTCCGTTGCTTCAGGCCTCTTCAGTGAAACAACTCCTGGAGGCCTATCGCCGTGAACAACCGGCCTGTATCCTC…
Rubinisphaera brasiliensis	+	WP_013627632.1	ATGGCCAAGTTCGGCGTTATCTTACCTGCTGCGGGTAAATCGTCTCGCTTTAGTCAGAATAACCGTAAAAAACCGTTCCTGGAATTGCAGGGTCGTGCAGTCTGGCTGCGTTCCGTGGAACATTTCGTCAACCGCGAGGATGTTGCTCAGGTGATCGTGGTCATCAGCCCGCAAGATCGCGAGTTTTTCGAGCTTAAGTTCCAAGCGAATCTGGCATTTATGGATATCGAAGTGATCGACGGGGGTGCGGAGCGCGCAGATTCGGTGTTTAATGGCCTGAAAAAAATCAAAGCCGATATTGACTACGTGGCGGTACATGACGCAGCCCGCCCTTTGTTAACCAAAAAATGGGTGGACAATGTTTTTCAAGCAGCCATCGAATCCGATGCAGCAATTTTG…
Rubrobacter xylanophilus	-	WP_011565134.1	ATGTCCGGCGCTGTGGCGCTGGTGTTAGCAGGTGGCAGCGGGACGCGTATGGGACGTCCTAAACAGTTCATAGAACTACTGGGTCGTCCGGCGCTCTATCACACCCTGCGCGCATTTCAGGAAGCACGTGAAGTTGAACGAATCTACGCTGTAGGAGAGGAAGAGCGTATCCGCGATCTGGCCTCTGGCTGTGGCATAGACAAACTCTGCGGGTGTGCACGTCCAGGGGAATCTCGCGCGTTGTCGGCCCGGAACGGTCTTCTGCTGTGCGGCGAAGAGGATGGTGTGATTTGTCTCATTCATGATGGCTCGCGATGTCTGGTGACGCCGCAGCTAATTGGCCGTGTGGTGCGCGCAGTTGAAGAAGGTGCCGACGGTGCGATCCCAGCTGTACCGGTC…
Ruminiclostridium cellulolyticum	+	WP_012634792.1	ATGAATCAGATTATCCAATCAGAGAAAGTTACCGCAATCATTACAGCCGCAGGCAAGGGAACGCGCATGAAATCTTCCATTAACAAACAGTATATTGAAATCGCAGGGGTACCGGTGCTAGCTCGCACCATCAGCGCCTTTGAAAATTGCTCTGAAGTGGATAATATTATCCTGGTGGTGAACGAGGAGGACATTAACTTTTGTAAGAATGAAATTGTAGAGGAATTTAATTTCACGAAAGTAATCAGTCTCGTGTCAGGTGGCGCTGAGCGCCAGAATAGCGTGTACAAAGGCCTGTGCAGCATCCGCGATAAGGATGGTGTCGTATTGATCCATGATGGCGCACGCCCATTTGTGACCAATGAAAACATTGTCGACTGTATCAATGCAGTTCGTGAA…
Spirochaeta thermophila	+	WP_014625525.1	ATGAGTGCGGATGCAGGTTTCGTGGTGACCGCGGCCGGAGCATCCGCTCGGATGGGTGGTGCTCGTAAAAAGGAATATCGTCTGCTGGACGGTCTCCCGGTCCTCTTGCACTCGATCCAAGCGGCCTTTCGCACGGGACTGTTTGATCGATATGTGGTGGTGCTCCCGCCGGGCGACGAGGCCGTGTGGTATGATGAGCTGCTGCCGCTGCTGGATAATCCTTGCCGCGATTTGGTTACGCTGGCACCGGGGGGAACCTCTCGCCAGGAAAGCGTCTTCCACGCGCTGGAAGCCCTGTCCGGAGACCCGCCTGAAATTGTGCTGATTCATGATGGTGCCCGTCCGTGGGTGAGCCCGGATTTGATCGGCCGGGTGTACCGCAAAGCGCGAGAGAAAGGT…
Symbiobacterium thermophilum	+	WP_011197236.1	ATGTCCATCCATGCGGGCGGCCTGCAAGTACCGGTAAGCGTGATAATTCCTGCAGCGGGAAGTGGTCGTCGCATGGGCGGTGGCACGGCCAAACAGTTTCTGCCGCTGCGTGGCGAGCCGGTCTTGGTGCGCACCGTCCGCAGATTTTCTGAATGCCCGCTGGTAGATGAAATCGTCATTGCGGCCGGTGATGTGGAAGCAACGCGTGCCCTGGTTGGGCATATGCCGAAAGTGACGCGCATCGTCCAGGGTGGAGCAGAACGCCAGGATTCGGTGTGGGCGGCCTTGCAGGCCGTTCACAGTCGTCCACGCATCGTCGCAGTGCACGACGCAGCCCGCCCGCTCCTGACTGCGGATGTGCTCAAAGGGGTGTTGCAAGCCGCCGCGGATCATCCGGCC…
Thermus thermophilus	-	WP_011174170.1	ATGGAAGTCTCTGTGCTGATCCCGGCTGCAGGTAATGGCTTAAGGCTGGGGCGTGGACCGAAAGCGTTCCTACAAGTCGGTGGCCGCACTCTCCTGGAATGGACATTGGCGGCCTTCCGTGACGCGGCAGAAGTGCTGGTTGCGCTGCCGCCGGGTGCAGAGCCGCCTAAGGGTCTTGGGGCGGTCTTTCTCGAAGGCGGCGCGACGAGGCAGGCATCCGTGGCGCGTCTGTTGGAGGCGGCTAGCCTGCCGTTAGTGTTGGTGCACGACGTCGCACGTCCTTTCGTATCGCGTGGTCTGGTCGCCCGCGTACTCGAAGCGGCCCAGCGCAGTGGAGCAGCTGTGCCCGTCCTCCCGGTGCCGGATACGCTGATGGCACCGGAAGGCGAAGCCTACGGA…
Treponema caldarium	+	WP_013969520.1	ATGGAAGGTCGTACCATCGCGGCTGTGATTACCGCAGCTGGCGCCTCAAGTCGAATGGGTGGGATTAAAAAAGAGTACCACTTGCTGGGTGACGGGCGCCTCGACGGGGCAGGAAAGCCTTTAACGGTTCTCGGTAGCGCCGTGTTGGCGTTTGCCGCATGTAGCGATATCTCGTATATTGTCATTACGGTGCCGTCTAATCCGGAGACCGGTGAAATGAAAGCCCGACAAGCGCTGCCAGTGTTCCCGGGCACGCTCAGCCCTAAACAAAAAATCATTTTTGTTCCGGGTTCGAATACTCGTCGCTCTTCCGTGCACCATGCTCTGGAGCTCCTTAAGGCGTATCACGTGGATTACGTTCTCATCCATGACGGCGCGCGCCCTTGGGTTCAGACCCCG…
Treponema denticola	+	WP_002680203.1	ATGCGTACAATTAAATCGTTGGGGTTTGCGGCAGTGATCACGGCGGCCGGCAAGTCGCAACGCATGAATCTTGATACCAAAAAGGAATACCTGCGATTGCCAGAGTATGGTGAGGGCGTCACCGTACTGAGTGAATGTCTGTTGAAATTCCTGCAGACGAAACTCTTTGAGGTTATAGTAGTTACGGTCCCGGCAAAAGACATCTCGGATGCAAATAATTTAATTTTCAACGACAAACGCATTGAAAAAGCGTTGTTAAAAAAAAACACCAAAATCATCTTCACGGCAGGTGCAGATACTCGTCAGACCTCGGTGTTTAAAGCGCTCGCAAAGCTGGGCGAACTGAAAGAGAAAAAGGAGGCAGATTTCAATTTTGTTCTGATTCACGACGGTGCGCGC…
Verrucomicrobium spinosum	+	WP_009964408.1	ATGCCGGCATCACCGCATTCGACTGCACGACCGCGTACGACTGCAATTATCGTAGCAGCCGGTTCCTCGCGCCGAATGGGCTTCAATAAACTGACCGCGGAACTCCTCGGGCAACCTGTTCTGCGCTGGACGCTGGCAGCGTTCGATGCATGCCCGGACGTGGATGACGTTCTTGTGGTTGTCGGTGATGCGACACGCCCGTTAGTAACTGCCTGGGTGGCCGAAGGTGCATTCACCAAACCGGTCACGCTTTCCGAAGGCGGAGCCGAGCGTCATCTGTCAGTCCATGAAGGCCTCCGGAAACTCCCGCCGGGGACGACGATCGTGGCGGTTCACGACGGGGCACGTCCGCTGATCACCCCGGTCCAGATTAGCGCATGCATCACCCGCGCCCGTGAG…
Totals:	38 (+), 0 (+/-), 7 (-)
IspG orthologs
Organism Name	Complementation Results	NCBI ID	Nucleotide sequence
Aeromonas hydrophila hydro. ATCC 7966	+	WP_011705645.1	ATGAGTGCGCATGAATCACCGATCATCCGCCGGAAAAGCCGTCAGATAATGGTGGGTAACGTCCCTGTGGGGGGTGATGCCCCGATCACAGTACAGACTATGACGAATACCAAAACGACGGATGTTGCAGCGACCGTGGAACAGATCCAACGTATCGAACGCGTCGGCGCAGATATCGTTCGCGTCTCGGTGCCTACAATGGAAGCGGCCGAGGCATTTAAATTGATTAAACAGCAGACGCGTATTCCGATCGTTGCAGACATCCATTTCGATTACCGTATAGCCCTCAAGGTAGCGGAATATGGGGCCGATTGTTTGCGCATTAACCCGGGTAATATCGGCAACGAAGAACGTGTGCGTGCAGTTGTAGACTGTGCTCGCCACTACAATATTCCTATT…
Allochromatium vinosum	-	WP_012971204.1	ATGTCGCAGACCAACACTCCGCAGCGTCGTCAAACACTACCTGTGACCGTTGGGAGCGTAACCATTGGCGGCGGCGCGCCGATTGTCGTGCAATCGATGACCAATACGGACACTGCTGATATTGATGCCACCGTTCGCCAGGTCGCCGAACTCGCGCGAGCGGGTTCCGAAATGGTCCGGCTGACTGTTAATCATGAATCCGCCGCACGTGCCGTCCCGGCAATTCGTGAAGCGCTCGAAGCCCAGGGGTGTCACGTGCCGTTAGTTGGCGATTTTCATTTCAACGGCCACCGTCTGCTCACCGATTATCCTGAGTGTGCGCTGGCGCTGGCGAAGTACCGCATTAATCCGGGCAACGTAGGTAAAGGCGAGAAAAAAGACTCACAGTTCGCTACCATG…
Anaplasma phagocytophilum	-	WP_021799467.1	ATGCGCGTTAGCCAGGCTGTACGTGTCGGTAAGGTTACAATCGGGGGTGGCCACCCTGTTGTAGTGCAGTCTATGGCTCTGGGTGGCTCCGGTAGTTTCGATAGAGATATGCAGGAAGTGCTGGCGCTGGCCCGCGAGGGCAGTGAATTGGTGAGAGTGGCGATCAACAGCGATGAAAGTATTAAAGTCATCCCAGATATGGTTGATGTTCTGGTTAAACATGGCTTCGACGAGAAAATGATCGTAGGTTGCGGTCAATATGAAGTAGCGCGGCTGCTCAGAGATTATCCAACCTGCGCGGCGGCCCTGGGTAAGATCCGCATCAATCCCGGTAATATCGGTTTCGGCGACAAACGGGACAAGAACTTCGAAGAAGTAATTGAGTTTGCAATCAAACAC…
Anoxybacillus flavithermus WK1	+	WP_006317886.1	ATGTCAGAGATCATCCATCGAAGCAAAACCCGCCCGGTTCGTGTCGGTAACATCACGATCGGAGGTAATAACGAAGTAGTGATCCAAAGCATGACGACTACAAAAACGCACGACGTAGATGCCACGGTGGCCCAGATTCATCGTTTGGAGGAAGCAGGCTGTCAAATCGTCCGTGTTGCCTGTCCTGACGAGCGCGCGGCTGATGCCATTGCGGAAATCAAAAAACGCATCAATATTCCGCTGGTGGTGGATATCCACTTTGACTATCGTCTCGCTCTGAAGGCCATCGAAAACGGGGCAGACAAAATTCGCATCAATCCTGGTAATATCGGTAAACGCGAGAAAGTGGAAGCAGTGGTCAAAGCAGCCAAGGAGCGTGGCGTCCCGATTCGTATCGGC…
Azoarcus sp. BH72	+	WP_011764661.1	ATGGTTGAGCAGGCGTTTCCATTCGGCTCCTTGCCGCGTCGTCCAACGCGCCAGGTCCGCATTGGGGGTGTGAGCGTTGGGAGCGCCGCACCGGTAGTGGTACAGTCGATGACTAACACGGATACTGCGGACGTCCTTGGCACGGCCATGCAGGTGGCGGAACTGGCCCGCGCAGGGAGTGAACTCGTGCGCATCACCGTGAACAATGAGGCAGCGGCCAAAGCGGTACCCCATATCCGCGACCGTTTGCTTGCCCTGAACATGGATGTGCCGCTGGTTGGCGATTTTCACTATAATGGTCACAAACTCCTGATGGACAACCCGGCCTGTGCGGAAGCGTTAGCCAAACTGCGCATCAACCCGGGGAACGTCGGCGCAGGAGCGAAGCGTGATCCGCAA…
Bacillus subtilis subsp. subtilis str. 168	-	WP_010886567.1﻿	ATGCAAGTTTCTGAAATCACTCATCGCACCAAAACTCGTCCGGTGAAGGTCGGCCCGTTGACAATTGGTGGCAATAATGAAGTTGTCATTCAGAGCATGACGACCACCAAAACGCATGACGTGGAAGCGACCGTCGCAGAAATCAATCGCCTGGCCGAGGCCGGTTGCCAGATTGTGCGTGTGGCCTGCCCGGATGAACGTGCCGCAAATGCCATCGCCGACATTAAAAAACGTATCTCGATTCCGCTGGTAGTGGATATCCACTTTGATTACAAACTGGCGCTGAAAGCCATTGAGGGTGGCGCGGACAAAATTCGTATTAATCCGGGTAATATCGGTCGTCGCGAAAAAGTTGAAGCTGTGGTAAAAGCGGCGAAGGATAAAGGCATCCCAATTCGT…
Blastopirellula marina DSM 3645	+/-	WP_002653018.1	ATGCAAATACAGCGCAATTCTACGCGCCGGGTGGTGATTGGCTCGATCGCCATTGGAGACGGGAATCCGATCGCGGTGCAAAGTATGACCGCAACAAAAACGCAGGATATTGACGCCACCGTGGGTCAGGTCCGTGCCCTGGAAGAAGCAGGCGCTGATGTAGTGCGCATCGCAGTCGATAATAAGAAAGATGCAGAAGCGCTCGCCGAGATTCGTCGTCAGACAAGCGCCAACCTGTCGGTAGACCTGCAAGAAAACTACCGCCTGGCAGAACTCGTGGCCCCACACGTCGATAAAGTGCGTTATAATCCTGGTCATCTGTACCATCACGAGCGTACTAAACCGTGGCGTGAAAAAGTTAACTATCTTGTGGGTGTTGCGCAGGATAATGACTGTGCA…
Candidatus Jidaibacter acanthamoeba	-	WP_039458840.1	ATGGTTGCACTGTCGCCGATCAATCGTCATAAAACACACCAGGTCATGGTGGGCGGCGTTGCTATCGGCGGTAACGCGCCCCTGGTTGTTCAAAGTATGACCAACACGGATACCTCAAACGCCGAATCCACGACCAAACAGATTATTGAACTGTTCGAGGCGGGCAGCGAAATTGTCCGCATCACGGTGAATAACGAGTCGGCCGCGAAAGCAGTTCCGAAGATCAAAAACAACCTTGTGAAACAGGGTTACAACGTGCCGCTGGTCGGCTGCTTTCATTATAACGGTCACAAGCTTCTCACCGATGTTCCTGAATGCGCAGCCGCGTTAGATAAATATCGCATTAATCCTGGAAACGTGGGTTTCGGGGAAAAGCGCGATAAACAGTTTGATGTCATG…
Cellvibrio japonicus Ueda107	-	WP_012487111.1	ATGCACTGCGAAAGTCCGATTGTTCGCCGTAAATCCCGCCAAATCATGGTGGGCAACGTGCCGGTAGGTGGCGGGGCTCCTATTAGCGTGCAGTCTATGACAAATACCGAAACGACTGATGTCGCAGCGACGGTAGAGCAAATCCGTCGCATCCAAACGGCTGGCGCGGATATTGTGCGTGTGTCTGTCCCGACCATGGAAGCCGCAGAGGCATTTGGGCTAATCCGCAAACAAGTAAATATCCCGCTGGTTGCTGACATTCATTTCGACTACCGCATTGCCCTTCGTGTGGCAGATCTGGGTGTCGACTGTCTGCGTATTAACCCGGGTAACATCGGCCGCGAGAAACGCATTAAGGCCGTAGTGGATAAAGCTCGTGACTTAAATATCCCAATTCGC…
Chlamydia pneumoniae AR39	-	WP_010883016.1	ATGACGTTGATTACGCCGGCGATCAATTCCAGCCGCCGTAAAACTCATACGGTTCGCATTGGAAATCTGTACATCGGTTCGGACCATTCCATCAAGACGCAAAGCATGACGACCACGCTGACGACCGACATTGATTCTACCGTCGAACAGATTTACGCTCTGGCAGAGCATAACTGTGACATCGTGCGTGTGACAGTGCAAGGCATTAAAGAAGCACAGGCGTGCGAAAAGATTAAAGAGCGTCTGATCGCATTGGGCCTTAATATCCCGCTGGTGGCGGATATCCACTTTTTCCCGCAAGCGGCCATGCTCGTCGCGGACTTTGCAGACAAAGTGCGCATTAATCCGGGGAATTACATTGATAAGCGAAACATGTTTAAAGGTACCAAAATCTACACG…
Chlamydophila caviae GPIC	-	WP_011006385.1	ATGGTGATTTCACCTAGCAAAAAGCAGGCCGCACGTCGCCATACTCATTCGGTAAAAATTGGTAATCTCTATGTGGGTTCCGAACACTCCATCAAAATGCAGAGCATGACAACGACCCCGACGGCGGATGTCGAAGCTACTGTGACGCAGATCTGTGCGCTCGTGGAGGCAAAATGCGAAATCGCACGCGTAACAGTGCAGGGTATCAAAGAAGCGCAAGCTTGCGAGCATATTAAAGAACGCCTGCTCTCTATGGGTATTGCAATCCCGTTGGTTGCCGATATTCACTTCTTTCCGCAGGCAGCAATGCACGTAGCAGACTTTGTGGATAAAGTGCGCATCAACCCGGGCAATTTTGTGGATAAGCGTAACATGTTCACCGGGAAAACGTATACGGAC…
Chromobacterium violaceum ATCC 12472	+	WP_011137085.1	ATGGATTCGGTTAACATTGCGCGTAGACCGACGCGCCTGGTGCGCGTCGGTCACGTTCTCGTCGGCTCTGACGCTCCGGTAATGGTGCAGTCCATGACTAATACGGATACAGCAGATGCCGCTGGGACGGCCGAACAAGTGTACCAACTCGCCCAAGCCGGCTCAGAGGTCGTTCGTATTACCGTAAACAGCCCGGAAGCCGCGGCTCGTGTGGCCGAGATTCGCCAGCGCCTGGACGATCTGGGCTGCGACGTACCGCTAGTGGGTGATTTTCATTTTAATGGGGACCGTCTCCTCAAAGAATTCCCGGACTGTGCCCGCGCGTTGGCAAAATATCGTATCAATCCGGGTAATGTGGGCAAAGGAGCCAAGGGGGATGACAAATTTGCATTCATGATC…
Clostridium cellulolyticum H10	-	WP_012634895.1	ATGGAGGACTGTATAAAGCGTAACCAGACCAAAAAGATTAAAGTAGGGGATATTTTCATCGGCGGCGACAGCCCGATTTCTGTGCAATCGATGACAAACACTGACACCCGCGATGTGAAGGCGACGATACACCAGATCAAGAGTCTCGAAGAGGCCGGTTGTGATATCGTCCGCTTGGCAATTCTGGATAATGAAGCGGCAACCGCGATTGGTGAAATCAAAAAACACGTGAAAATTCCGCTGGTCGCGGACATCCATTATGACTATCGTTTGGCGGTAGAGTGTATGAAGAACGGCGTCGACAAAATACGCTTGAACCCGGGTAACATCGGTGGCAACGACCGCGTGCGTACTGTCGCCGGCATGGCAAAAGAACGCGGCATCCCTATCAGAATTGGG…
Collinsella stercoris DSM 13279	-	WP_006721237	ATGGCACCTTGCGCACGCGAACTTACTCGCCCGGTCGTGGTCGGCGACGTTCAAATAGGTGGCGGTGCGCCGGTGGTCGTGCAGAGCATGACCTGTACCCCAACGACGGATGTCGCTTCTACGCTGGCCCAAGTGCGCGCACTCGCCGAGGCAGGCTGCGATATTGTCCGTGTCTCAGTCCCTACGAAAGAGGCCCTGGGACCGTTCGGTGTGGTTTGTCGCGAAAGCCCCGTGCCGATCGTAGCAGATATTCATTTTGACTACCGCCTAGCTATTGGCGCCGTACAAGCAGGTGCAGCCAAACTGAGAATCAATCCGGGGAATATCGGTGATTGGGACCGCGTGGACGCAGTTATCGATGCAGCGGGGGAAGCGGGCGCCGCAATCCGTATTGGGGTG…
Colwellia psychrerythraea 34H	-	WP_011044983.1	ATGTTTAAAGAGAGCCCGATCATTCGTCGCGTGAGTCGCCAGATCATGGTCGGCAACGTGCCGGTGGGGGGTGATGCTCCGATTACGGTACAGAGCATGACCAACACACTCACTACCGACGTGGCGGCAACAGTGGCACAAATCAAGGCTCTGGAAGCAGTTGGGGCGGACATCGTGCGCGTGTCTGTTCCAACGATGGATGCAGCTGAAGCATTTCGGGAAATAAAAAAACAGGTAAATGTTCCGTTGGTGGCGGACATCCATTTCGATTATCGCATCGCACTCAAAGTAGCCGAGTATGGGGTGGATTGTTTACGTATCAATCCCGGGAACATTGGTAACGAAAACCGCATCCGCAGCGTCGTCGAATGTGCGCGTGATAATAACATTCCGATCCGC…
Coraliomargarita akajimensis DSM 45221	-	WP_013044727.1	ATGACTGATCTGCAGCACACGCAATTGCATTACTGTGCCAGCCGCTTCCAAGCGCAGCGTCGCCTGAGCCGTGAAATCAACGTTGGCGGAGTGCGTGTGGGTGGCAATAACCCAATCAGAATCCAGTCCATGACCACGACAGACACGCAGGATGTCGACGCAACAGTAGCCCAAACGCTGGCCTTGGCGGAGGCTGGTTGTGAAATTGTGCGTATTACCGCACCGAATAAAAAAGCCGCAGAAGCACTGGGAGAAATCTCGAAGAAAGTACGCGCTGCAAAATGCGATGTGCCGCTGGTGGCGGATATACACTTCCTCCCGGCGGCGGCAATGGAGGCGGCCAAACACGTCGAAAAAGTGCGCATCAACCCGGGCAATTATGCAGATAAAAAAAAATTT…
Crocosphaera watsonii WH 8501	-	WP_007308082	ATGCAGACGCTTGAAACTCCGAAAACACCAAAAATCATCTCGCAACCTGATTTTGATACTACCATTCACCGCCGCAAGACACGTCCGGTGAAAGTCGGCAATATCACGATTGGTGGTGGGTTCCCGGTTGTGGTGCAGTCTATGATCAACGAGGACACGCTAGATATTGAAGGCAGCGTGGCCGCAATCCGTCGCCTTCACGAGATCGGGTGCGAGATTGTTCGTGTGACGGTTCCGTCGATGGGTCACGCGAAGGCACTGGCAACGATCAAGGAAAAACTGGCACAGGTGTATCAACCAGTGCCGTTGGTGGCGGATGTACATCACAACGGCCTGAACATCGCACTGGAAGTTGCGAAACATGTAGATAAAGTCCGCATTAACCCCGGGTTGTATGTG…
Cyanothece sp. ATCC 51142	-	WP_009544989.1	ATGCAGACTCTCGAAACCCCGCAAACGACAAGCAAACCGGAGTTTGACACCACAATCCACCGTCGAAAAACGCGTCCGGTAAAGGTGGGCGATATTACTATCGGGGGTGGCTTCCCTGTTGTGGTGCAGTCTATGATAAATGAAGATACGCTCGACATCGAGGGATCTGTTAGTGCGATCCGGCGCCTTCACGAAATGGGTTGCGAAATTGTCCGTGTGACCGTTCCGAGCATGGCGCACGCTAAAGCACTCGCCACGATCAAAGAAAAATTGGCACAGGTCTATCAACCGGTGCCGTTGGTTGCCGACGTGCACCATAACGGCCTCAAGATAGCGCTGGAGGTTGCGAAGCATGTAGATAAAGTGCGCATTAATCCGGGGTTGTACGTGTTCGAAAAG…
Deinococcus geothermalis DSM 11300	-	WP_011529847.1	ATGCCGCCACCGGTTCGTGTGAACTGGCCGCGCATGCGCACCACGCGCCGTCAGACCGTCACCACATGGGTGGGCAATGTTCCGGTAGGTTCCTCGCATCCCATCGTGGTGCAAAGCATGACGAATACAGACACGGCGAATGCGGAAGCAACGGCTTTGCAGGTGGCACAGCTGGCGCGTGCGGGCTCGGAGATTGTGCGTGTAACGGTTAACACGCGCGAAGCCGCGGCAGCCCTTCCTGAGATCGTGGCCCGCCTGCACGACCTGGGGTTGGATGTACCGCTTGTGGGTGATTTTCATTACAATGGCCACCTGCTGCTCCGCGAGTATCCGGAAACTGCGCGCCTCCTGGCGAAATATAGAATTAACCCTGGGAATGTAGGCGCGGGTCAACACCAC…
Desulfitobacterium hafniense DCB-2	-	WP_015944737.1	ATGGAGCGCAAACTTACCAAGACGGTTCGCATAGGCGATGTTATCATTGGAGGGGGGTCCCCGATCGTAGTGCAAAGCATGACAAATACGGACACGCGTGATATCCCGGCTACTTTAGCCCAGATCCAAGCACTCGCGCGCGCCGGATGCGAAGTAGTGCGCCTGGCAGTTCTTGACCGCGAGGCGGGCTATGCACTGGGTGAAATCGCCCTCAAGTCCGAACTGCCAGTAATTGCAGATATCCACTTTGACTATCAGCTCGCGTTGCTTGCAATTGAACAGGGAGTGCATGGTCTCCGCCTGAACCCGGGCAATATCGGCGCCCGCTGGAAAGTTCAGGAAGTCGTGCGCGCATGCAAAGAGCGTGAAATTCCGATCCGCATTGGGGTGAACGCCGGC…
Erythrobacter longus	-	WP_034962069.1	ATGTCGAGCGTGCGTCCCTGGCGTGATATTGACCGCCGTGAATGTCGGCAGATTATGGTAGGTAATGTGCCGGTCGGCGGTGGGGCACCTATCACGGTCCAAACAATGACTAACACTCCCACCGAAGATGCAGTGGCGACGCTTGATCAAATTCGCCGCTGTGAAGAGGTTGGCTGCGATATCATTCGTGTTAGCTGCCCTACTGAAGAATCTACAAAATCTTTCGCCAAGATCACCAAAGCGGCCCGTATACCAATCGTTGCGGATATTCACTTTCATTATAAACGCGCGCTGGAAGCAGCGGACGCGGGGGCGGCGTGTCTTCGCATCAACCCAGGGAACATTGGCTCTAGCAAACGCGTTGCAGAAGTCGTTCGTGCTGCGAAGGCAAACGGCTGC…
Gemmata obscuriglobus UQM 2246	-	WP_010049453.1	ATGGCCACGTCTAGCCGCTTCGATATCTCGCGTTTGGAAGCAGCTCCTCGCGTCCCGGGCAAACCGCGGCATAAGACGAGGGAGGTGAAAGTGGGCACGCGTGTATTTGGTGGCAGTAACCCTGTTTGGGTGCAGAGTATGACCACGACGGATACGTTTGATGTTGACGCGACCGTGAAACAAATCCACGCCCTCGAGGAAGCGGGTTGCGAGTTGGTCCGCGTGACGGTCCCGAAGCCGGAAGACGCGGGCGCGCTATCTGCCATTCGAGCGCGTGTGGGGATTCCTCTCATCTGTGATATCCATTTTGATTACAAAATGGCCCTGGCCGCGTTGGATCACCCGGTGGATAAGATCCGTATCAATCCGGGCAATATTAACAAAGCCGGAGATACTACG…
Geobacillus thermodenitrificans NG80-2	-	WP_008879881.1	ATGAGCGAGATTATCCATCGCTCTAAAACCCGCCCGGTTCGCGTGGGCTCACTGACGATAGGGGGCAACAACGAAGTGATCATCCAGAGTATGACGACGACCAAGACACACGATGTGGACGCGACGGTAGCCCAAATACATCGCCTGGAGGAGGCAGGCTGCCAGATTGTCCGTGTTGCGTGTCCTGATGAACGCGCCGCAGATGCGATTCCGGAGATTAAGAAACGTATCAATATACCCCTGGTCGCGGACATTCATTTTGATTACAAACTGGCTCTCAAGGCTATTGAAGGCGGGGTGGATAAAATCCGCATTAATCCGGGCAATATCGGTCGTCGTGAAAAAGTGGAAGCAGTGGTTAAAGCTGCGAAAGAACGCGGGGTACCGATCCGCATTGGG…
Helicobacter pylori	-	WP_000892444.1	ATGTTGGAGAATCGGGTCAAAACGAAACAAATCTTCATTGGGGGCGTGGCCATTGGCGGGGATGCGCCTATTTCAACACAATCCATGACCTTTTCAAAAACCGCGGATATTGAAAGCACTAAAAATCAAATCGATCGCTTCAAACTAGCCGGTGCTGACTTGGTTCGTGTGGCGGTGAGTAATGAAAAAGACGCCCTCGCTCTCAAAGAACTGAAAAAAGTGAGCCCACTGCCGCTGATTGCAGACATCCATTTCCATTACAAATTTGCGCTGATTGCGGCACAATCGGTCGATGCAATCCGCATCAATCCGGGGAACATCGGCTCAAAAGACAAAATTAAAGCGGTTGTTGATGCGTGCAAAGAAAAGAATATTCCAATACGTATCGGTGTGAACGCA…
Heliobacterium modesticaldum Ice1	-	WP_012283321.1	ATGGAAATTGCCTTGCCACGCCGAAAGACCCGTCGCATCTATGTGGGTACCGTGCCGATTGGCGACGGGGCCCCGGTTTCCGTCCAGAGTATGTGTAACACGGACACCCGTGACGCAGCCGCAACGCTAGACCAGATTTCGCGTCTGGTAGCGGCCGGTTGCGAAATCATCCGCGTAGCCGTTCCGGACGCTCAAGCGGTGGAGGCCCTCCCGGCTATCGTCCAGGGGAGCCCCGTACCGGTGATTGCAGACATCCACTTTGATCACCGCTTGGCGATTGGTGCACTGAAGGCCGGCGTGCAGGGTCTACGCCTGAATCCGGGGAACATTGGCGGCGCGGTACCGGTACGTGAAGTGTTAGCCGCAGCCCGCGAACGCCAAGTCCCGATCCGTATTGGT…
Herminiimonas arsenicoxydans	-	WP_011870774.1	ATGTCTAGCAGTGATCCAATTGCGACTGGGCCGTTTTCCCGCCGTAAAAGTCGCATCGCCGTGGTATCTTACGGTGGCCGTGAGGTACGTATCGGAGGAGACGCGCCGGTGGTAGTTCAGAGCATGACGAATACGGACACTGCCGACGTGATCGGCACCGCGATACAGATTAAGGAACTCGCCCGCGCAGGATCAGAAATGGTTCGTATTACTGTCAATACACCGGAGGCTGCCGCAGCCGTCCCGGCGATCTGTGAGCAGCTCGATAAAATGGATGTCGTGGTCCCGTTGGTAGGCGACTTCCATTATAATGGCCATACCCTGCTGAATGATTATCCGGATTGTGCCAAAGCACTCGCCAAGTACCGTATCAACCCGGGCAACGTGGGGAAGGGCAAT…
Isosphaera pallida IS1B	-	WP_013565520.1	ATGGCGTATGCAACGACCATCCAACGCCGTAAAACACGCGTGGTGGAAGTGGGGGGTCACGGCGTAGGTGGTGATAACCCTATCTGGGTACAGTCGATGACGACCACAGACACGTTCAATGCAGCAGCCACGATCGAGCAAATCCATCGCCTGGAAGAAGCGGGGTGTGAGCTGGTGCGCGTAACGGTACCGAAGAAAGAGGATTTAGAAGCTGTGGGGTACATTAAAAGCCAGATTAAGATCCCTCTCATTGCCGACATCCATTATGATTATCGTATGGCATTGGGATGTCTGGAAGCGGTGACTCCGGATGGTAAACGCGCCATCGACAAAGTTCGTATTAACCCAGGCAATATTGGAGGAGAGGAGAGATTTAAAGAGGTGATACGAAAAGCAAAG…
Jannaschia sp. CCS1	-	WP_011455057.1	ATGAGCCACAATCCTATCCGACCGTGGCGTAATATTGACCGCCGTAAGTCGCGCCAGATTATGGTCGGGAACGTGCCGGTCGGCGGTGACGCGCCCATCACGGTTCAAACGATGACGAATACGTTGACAACGGATGCTTCTGCAACAATTAAACAGGTGATCGCCGCGGCTGAAGCCGGCGCAGATATTGTCCGCGTGTCCGTCCCTGACGCAGATTCTGCCCGAGCGATGCATGAAATCTGCCGTGAGAGTCCGGTCCCGATTGTAGCCGATATCCACTTTCATTACAAACGCGGTATTGAAGCGGCTGAAGCGGGAGCTGCCTGTCTTCGTATCAACCCGGGTAATATCGGTGACGCTGCACGTGTCAAAGAAGTGGTTAAAGCGGCTCGCGATCAC…
Jonesia denitrificans DSM 20603	-	WP_015771297.1	ATGACTGTACCAATATCCCTGGGCATGCCGCAGGCGCCCGCGCCGGTGCTGGCCCCACGTCGCAAAACGCGTAAAATCAAGGTAGGGAAAGTGGATGTGGGCGGGGATGCCCCGGTGTCGGTACAGTCGATGACGACGACTCCGACGACCGACATTAATGCGACGCTGCAACAGATTGCCGAACTCACCGCGAGCGGATGCGACATCGTGCGTGTAGCGGTCCCGTCGGCAGACGATGCAGCGGCACTGCCGGCGATCGCAAAAAAAAGTCAAATTCCGGTTATCGCAGACATTCACTTTCAACCGAAGTATGTATATGCGGCAATCGACGCCGGCTGCGCGGCCGTGCGTGTTAATCCAGGTAACATTCGCAAATTTGATGACCAAGTGAAGCAGATC…
Lamprocystis purpurea	-	WP_040527635.1	ATGTCGAGTGTGCCGTCGAGTATTCAGAGTCCGATTCAACGCCGTGTGACCGTGCCGGTGCGTATCGGTCCAGTGACCGCAGGTGGCGGCGCACCGATCGTGGTGCAGTCCATGACCAATACTGATACTGCTGACGTTGCGGCCACGGTCCGTCAGGTCGCGGAGCTAGCCGAAGCCGGCTCTGAACTGGTTCGCATCACCGTCAATACAGAGAGTGCCGCGAGAGCGGTTGCGCAGATTCGCTCTACACTGGACGCGCAAGGTTGTAATGTGCCGTTAATTGGTGACTTTCACTTTAATGGACACCGGCTGCTGACTGATTACCCAGATTGCGCACAGGCCTTAGCCAAATACCGCATTAACCCGGGTAATGTGGGTTCTGGTGCGACGCGTGACTCG…
Marichromatium purpuratum	-	WP_005223505.1	ATGTCACCGGATCGCAGCTCTATTCAGAGACGTGCCTGCGTCCCAGTTAGGGTCGGCCATTTAACCATTGGGGGTGATGCTCCGGTTGTGATTCAGTCCATGACCAATACCGATACAGTGGATGTTGAAGCAACGGTCAGACAGACTCTAGCGTTAGCACGCGCTGGGTCAGAAATGGTGCGTATTACGGTTAATAACGAAGAGGCGGCACGTGCAGTGCCACGTATTAGAGAAGCCCTGGATGCGCAGGGGTGCGCAGTCCCGTTGGTCGGTGATTTTCACTTCAACGGCCATCGCCTGCTGAATGATCATCCTGCGTGTGCCGAGGCACTGGGCAAATACCGTATTAATCCCGGTAACGTCGGCCGGGGTGAAAAAAAAGATGCTCAATATGCTAGT…
Mariprofundus ferrooxydans	-	WP_009850323.1	ATGCAGGATGTCATTGTCGCGGCCAGGCGCAAGACCCGCCAGGTCCAGGTGGGTTCTGTGGCTGTGGGGGGAGATGCACCGGTCGCCGTCCAGTCCATGACGAACACATTAACCACCGATATCGATGCCACCGTTGCCCAAATTCACCGTCTGGATGAAGCGGGTGCGGATATAGTGCGCGTTTCTGTGCCGGACCCTGATAGTGCGGCTGCGATGCCAGAAATTCTGGCTCAGACTAACGTGCCCCTGATTGCTGATATCCATTTCAGCTATAAAATGGCACTGGCGAGCCTGGAGGCCGGCGTGCATGGCCTGCGTCTGAACCCAGGCAATATTGGTAGTCGCGACCGTGTAGAACGGGTAGTGAAAGCTGCCGCTGAACGCGGGGTCTCCATACGA…
Methylacidiphilum infernorum V4	-	WP_012464304.1	ATGCGTAACCGTGGCCGTAAACGCACCGTACGTACGTTTGTGCATGTATTCGATAGCAGACCGAATATGTTCACTGATAAAACGCATTTTTGCTCTTATAAACGTCGCCAAGCACGCGAAGTGGCGGTCGGAAAAGTGAAACTTGGTGGTGGTAATCCGGTCGCGATCCAATCGATGCTGACGTCCGATACCATGGATACAACCGCTTGCCTGAAAGAGACATTGGAACTGGTTGAGTCCGGTTGTCAGATTGTCCGCATTACGGCCCCGACCGTGAAGGACGCATCGAATCTAGAATTTATCCGTCGCGGGCTGAACGATCGTGGCTGCGACGTTCCGCTGGTCGCAGATATCCATTTTAAACCGGAGGCGGCCATGGAAGCGGCAAGATGGGTTGAA…
Methylobacillus flagellatus KT	-	WP_011479842.1	ATGGATCATCAGTCCCTGAGCCGCCGTACGACTAAAACGGTGATGATCGGGCATGTGCCGGTAGGTTCTAGCGCCCCGGTGGTCGTACAGTCTATGACAAATACGGACACCGCAGATGCCGCGGCAACCGTTCGACAAGTGTATGAACTGTGGCGTGCGGGGTCAGAAATCGTTCGTATTACCGTGAACTCTCCTGAAGCCGCAGCGCAGGTGGGCGCGATCCGCCGCCAACTCGACGATCTGGGCTGTAACGTCCCGCTCGTGGGGGACTTCCATTTCAATGGCCATCGTCTGCTGGCGCAGTACCCGGACTGCGCAGAAGCGCTCGCCAAATACCGCATCAACCCGGGGAACGTCGGAAAAGGGTCCAAACGAGACGAACAGTTTAGCGCCATGATT…
Moorella thermoacetica	-	WP_011392557.1	ATGCCGGGCCGCCGTCGTCCAACTCGCCGCATTCAGGTAGGTAAAGTCGCAATCGGAGGGGGTGCGCCGATCAGCGTGCAGAGTATGACAAACACGGATACACGCGATATCACGGCTACCGTGGCCCAAATCCGCCGTCTGGCGGCAGCGGGCTGTGAAATTGTACGCCTCGCTGTACCAGATCAAGAAGCAGCCCTGGCGCTCGCAAAAATCAAGGCACAGGTAGAAATTCCCTTGATCGCGGACATTCATTTTGATTACCGCCTTGCCTTGGCGGCACTGGAGGCGGGTGTGGACGGGTTACGTTTGAATCCGGGTAATATCGGTGGGCCAGAACGTGTGAAAGCCGTGGTGAAGGAGGCAGCGGCTCGCCGTGTTCCGATCCGCATCGGCGTGAAT…
Mycobacterium smegmatis str. MC2 155	-	WP_003893935.1	ATGACAAGCATCGGTTTGGGCATGCCAGCACCGCCGGCTCCGACCCTGGCCCCGCGCCGTAAAACACGCCAATTGAATGTGGGAGGGGTTGGGATTGGTTCCGAACACCCGATAGCCGTGCAGAGCATGTGTACCACGAAGACCCACGACGTGAATTCGACGCTGCAACAGATTGCCGAGCTCACCGCCTCAGGGTGTGATATTGTCCGCGTGGCATGTCCGCGCCAAGAAGATGCTGACGCATTAGCCGAGATTGCCCGACATAGTCAGATCCCTGTAATCGCGGACATTCACTTTCAACCGAAGTACATCTTTGCCGCTATCGATGCCGGTTGCGCCGCAGTGCGCGTGAACCCGGGGAATATTAAAGAATTCGATGGCCGTGTCAAAGAAGTAGCG…
Nitrosococcus oceani	-	WP_002810560.1	ATGGAGCTTCCACGGAACCCGACGCGGCCGGTGCGCATTGGTACAATTACGATCGGCGATAACAACCCTGTTGCAGTGCAAAGCATGTGCGCTACCCATACGCGCGATGTGGGCGCGACAGTTAAACAGATCAATGACCTGATTAAAGCTGGTGCGGACGTGGTGCGCATTGCGGTGGATACGAAACGTGACGTGGAAGCACTGATCGAAATCCGTCAGCAGACACAGGCCAACCTGTCCGTGGATCTGCAGGAAAACTACCGTCTCGCAAAAACCGTGGCGCCGCATGTTGACAAAATACGGTATAATCCCGGTCATCTGTACCACCATGAACGGCAGAAGCCGTGGCAGGATAAAGTGAAATTCCTGCTTGAAGTTGCTGGAGAGAACGACTGCGCG…
Nitrospina gracilis	-	WP_005010040.1	ATGAGCGCCAACATTAAACCACGTACGACACGTAAGATTAAGGTTGGTACCCTCACCCTGGGTGGCGACAGTCCCATTGCGGTGCAGTCGATGACTGCGACTCGTACTCAAGACCTGCAAGCGACGGCCCGTCAAATCGAAATTTTGGAAAAGGCAGGCGCGGACATTATTCGTATTGCGGTGGACAGCAAGGAAGACGTGGAAGCGTTGAAAATTCTGCGCAAGGGCAGCAAAGCGATTTTTTCCGTAGACCTGCAGGAAAACTACCGCCTCGCGCCGATTGTCGCACCGTATGTGAACAAAATCCGTTACAACCCGGGTCATCTGTGGCACTTAGATAAGGATAAAACCATCAAGGAAAAAGTTGAATTTATCGTAAACGCAGCGCGCGAACACGAA…
Nostoc punctiforme	+/-	WP_012411346.1	ATGCAGACTCTGCCAATCGTTGATACGTCCAATACAGCTAGCTCCCAACATATCTTCGATACGACAATTAAACGCCGTAAGACACGTCCTGTGAAAGTGGGCAACGTTACCATCGGTGGGGGCTACCCGGTCGTGGTCCAATCAATGATTAATGAAGACACACTCGATATCGACGGATCGGTGGCGGGCATTCGTCGTCTTCATGAGATTGGATGTGAAATCGTTAGAGTAACCGTGCCTAGTATGGCCCACGCGAAGGCCTTGGCGGAGATTAAACAGAAACTGATTAAAACTTATCAGGATGTGCCGATCGTTGCGGACGTCCATCACAACGGCCTTAAAATCGCACTCGAGGTCAGCAAACATATTGAAAAAGTTCGTATCAATCCCGGGTTGTAC…
Novosphingobium aromaticivorans DSM 12444	-	WP_011444079.1	ATGAGCTCTGTTCGTCCCTGGCGCGATATTGCACGTCGCAAATCTCGCCAGATCATGGTAGGGACGGTACCGGTGGGTGGTGATGCGCCGATTACGGTCCAAACGATGACCAACACCCCGACCTCGGACGCCGTGGCGACAATTGATCAGATCCGCCGTTGTGAAGAAGCGGGCGCAGACTTGATTCGCGTGTCTTGCCCGGATGTTGAATCAACGGCAGCGTTTCGTCAGATCGCACGCGCTGCCCGCGTTCCACTGATTGCGGATATCCATTTCCATTACAAACGTGCACTGGAAGCCGCAGATGCCGGTGCGGCTTGTCTGCGTATCAATCCTGGTAACATCGGCAGCTCCGACCGCGTGGCAGAGGTTGTACGTGCCGCGAAAGCCAATGGCTGC…
Pantoea ananatis LMG 20103	+	WP_013026734.1	ATGTGGCGTCGCAACATGCATAATCAGGCACCTATTATCCGCCGCAAGTCGAAACGTATCTACGTTGGGCAGGTCCCGATCGGTGACGGTGCACCGATCGCGGTGCAGTCCATGACCAATACGCGCACCACAGACGTCGCAGCGACGGTCAACCAAATCAAAGCCCTCGAACGTGTGGGGGTCGATATTGTGCGTGTAAGCGTTCCGACAATGGATGCAGCAGAGGCGTTCAAGCTGATCAAACAGCAAGTCAACGTTCCGTTGGTGGCCGACATTCACTTTGATTATCGTATCGCGCTTAAAGTCGCGGAATACGGTGTCGATTGCCTGCGTATTAACCCGGGCAACATTGGCAATAACGAACGCATCCGTGCAGTTGTCGATTGTGCACGCGATAAT…
Pelagibacter ubique HTCC1002	-	WP_011281768.1	ATGAGTCTGCGTCCTTTTCGCGATATTCACCGTAAAAAGACCAAAGTAATTAACGTGGGTGATGTCAAGATTGGCGGGGACAACCCGATCAGTGTGCAGTCTATGACCAACACGCTGACCACGGATATTCAAGCCACAATTAAACAGATTAATGACATCCATGAAGAAGGTGCAGATCTGGTGCGCGTGAGCTGTCCTGATGAGGAATCCTCTCTGGCACTGAAGGAAATTACGAAACACGTGAGTGTGCCGATTATCGCAGATATCCACTTCCACTACAAGCGCGCTATTGAGGCCGCCGAAAATGGCGCCAAATGTTTACGAATCAACCCTGGGAATATTGGAGATAAACTTAAAATTCATGACGTTTTGAGCGCAGCGAAAAACAATGATTGCTCG…
Pirellula staleyi DSM 6068	-	WP_012911045.1	ATGCAGATCCAACGTAATCCTACACGCTCGGTACGTATCGGCTCTTGTACCATTGGGTCCGGCCACCCGATCGCAGTGCAGTCAATGACGGCGACGCACACACAGGACATTGACGGTACAGTGGCATTGGTGAACGATCTGTACGAAAACGGCGCTGATGTTGTACGCATCGCCGTGGACAGTAAGAAAGACGCGGAGGCACTGGCGGAAATTCGCAAACAAACTAAAGCCAATCTCTCTGTTGATCTGCAAGAGAATTATCGTTTGGCCGAACTGGTCGCACCGCATGTGGATAAAGTGCGTTACAACCCGGGACATCTCTACCACCATGAGACGCATAAACCGTGGCAGGAAAAAGTGCGATATCTTGCGCAAGTGGCAATAGATAATGACTGTGCC…
Planctomyces brasiliensis DSM 5305	-	WP_041399500.1	ATGTCTAGCCCCTTGTTTAGCCTGCAGCGTCAGGCGCAAAATGAGATTATGGAGATCACGCGCAATCCGACCCGGGAAGTGCGTATCGGCTCGATTGCAATTGGAGCCGGCAATCCGATTGCGGTCCAATCCATGACGGCTACGAAGACGCAAAACGTCGATGCCACCGTGGCCCAAATTCAGCATCTCCTAGAAGCAAATGCGGACGTGATCCGTGTTGCCGTCGATAGCAAAAAAGATGCCGCGGCTCTGAAAGAAATTGCTGCGCAGACAAACGCCAATTTATCAGTGGATCTGCAAGAGAACTACCGTCTCGCGGAGTTGGTGGCCCCGTATGTGCAGAAGATCCGCTACAATCCGGGTCATCTTTATCACCATGAACGCGAGAAACCGTGGCAA…
Plasmodium falciparum UGT5.1	-	EWC76322.1	ATGTCTTATATTAAACGCTTAATCTTGTTCATGCTTCTGTTCTACTCACATGTGAAAATTAAAAAGCTGTTCATCAAAATTAGTAATGTGAATATTTTCTTCGCAGAAGCTAAGAAGAACGGCAAAAAAGAGTTTTTTCTGTTCCTGCTCAATATTAAGAAAAACTCTCAACAGAAAAAGACTTACCATATTACTAAACGTAATACCATTAATAAGAGCGACTTTCTCTATTCTCTGCTGAATGAAGAAGGTAACAGCTCGAAAAAAGAATACAAAAATCTGAAAGACGAGGAAAAATATAATATCATTCAGAACATTAAGAAATACTGCGAATGCACCAAAAAATACAAACGCCTTCCAACGCGTGAGGTCGTCATCGGTAATGTAAAAATTGGAGGC…
Porphyrobacter neustonensis	-	WP_068350622.1	ATGAGTAGCATTCGTCCATGGCGCACGATCGAACGGCGGAAATCCCGCCAAATTATGGTGGGTAACGTCCCAGTAGGTGGAGATGCTCCGATCACCGTACAGACAATGACCAACACCCCCACTGAAGACGTGCGCGCAACTCTGGATCAGATTCGCCGTTGTGAGGACGTGGGCGCGGATATTATCCGCGTGAGCTGTCCTACCGAAGAAAGTACCCGCGATTTTAAAAAAATCACGCAGGGTGCAAACATTCCTATCGTGGCGGATATCCATTTTCACTATAAACGCGCGCTGGAAGCAGCGGATGCCGGTGCCGCCTGCCTTCGAATTAATCCCGGTAACATCGGAAGCAGCCAACGTGTGGCTGAAGTAGTGCGGGCGGCCAAAGCGAATGGCTGC…
Rhodobacter sphaeroides 2.4.1	-	WP_011908874.1	ATGTCTCTGAACCACGTTCGTCCGTGGCGTAACATCCACCGTCGTAAATCTCGTCAGATCATGGTTGGTAACGTTCCGGTTGGTGGTGACGCTCCGATCTCTGTTCAGACCATGACCAACACCATCACCGCTGACGCTCCGGCTACCATCGCTCAGGTTCTGCGTGCTGCTGAAGCTGGTGCTGACATCGTTCGTGTTTCTGTTCCGGACGAAGCTTCTACCCGTGCTCTGAAAGAAATCGTTGCTGCTTCTCCGGTTCCGATCGTTGCTGACATCCACTTCCACTACAAACGTGCTATCGAAGCTGCTGAAGCTGGTGCTGCTTGCCTGCGTATCAACCCGGGTAACATCGGTGACGCTTCTCGTGTTCGTGAAGTTATCAAAGCTGCTCGTGACCAC…
Roseobacter denitrificans	-	WP_044033137.1	ATGAGTTTGAACCATGTTCGCCCCTGGCGAAATATTTATCGCCGGGCCTCGCGCCAAATTATGGTCGGCAACGTGCCGGTGGGAGGCGATGCGCCGATCACAGTTCAAACCATGACCAATACTTTAACGACTGACGTCAAAGCAACGATCGATCAGATTAACGCGGCGACCGATGCGGGTGCGGACATCGTTCGTGTGAGCGTGCCAGACGAGGCGTCTAGCAAAGCCCTTAAACAGATCGTCCCGGAGGTATCTGTTCCAATCGTTGCGGATATTCATTTCCATTACAAGCGCGGGATCGAAGCCGCTGAAGCGGGTGCGGCGTGCCTGCGTATCAACCCGGGCAACATCGGTGACGAGAAACGCGTAAAGGAAGTTATCAAAGCCGCCCGTGATCAT…
Rubrobacter xylanophilus DSM 9941	+	WP_011564385.1	ATGACGGAAACAACGGTTCGCGAGCGCCCGGTCACATCTCGACGCATTATGGTGGGCGATGTGCCAATCGGCGGAGGGGCCCAGATTGTGGTTCAGTCGATGACGAATACGCCGACCCACGATGTCGAAGCGACGGTGCAGCAAATCTACGACCTGAACGCAGCGGGTGCCGAGCTGGTACGTGTTTCTGTAAATGGCAGTAAAGCACTTAAGGGCTTTCGCGAGATAGTGCCGCGATCCCCCGTGCCTTTAATTGCGGATATTCATTTTGACTATCGCATGGCTCTCGGGGCCGCCGATGCAGGCGCCGCGTGTGTGCGCATCAACCCAGGTAACATTGGCTCGGATGACCGCTTCCGTAAAGTGATTGAAAAATGCCAGGAAAAAGGTATTGCGATG…
Spirochaeta thermophila DSM 6578	-	WP_014624852.1	ATGGGAGATATGTCGCAACGTGAACATTTTGTTCCGCCGGAGGGTGGCCGAGAAGTGTATACTACGAAAGCCGTGCCGGTGGGTTCTCTTGTGATCGGTGGCGGCGCCCCGCTCGTCGTGCAGACGATGTGGAAAGGTCCTTTAACGCCGGAGACCGTTTCGACGATTGTTGAGGAACTGGAACGTCTTTCTAAAATGGGCTGCGGTCTGATGCGCTTTGCCGTCCCGGACATGACCGCTGCCGAGGTGGTTGGCCGTATCGCCGAACGCAGTCTGATGCCGGTAGTGGCCGACATCCACTTCGACTGGCGTCTCGCGCTCAGGGTCATGGATTTCCCCGTGGCCAAGGTACGGATCAACCCGGGTAACATCGGGGCCCGATGGAAGGTCGAAGAAGTG…
Streptomyces cattleya DSM 46488	-	WP_014145650.1	ATGACCCAGACCGTTTCTCTGGGTATGCCGTCTGTTCCGCTGAAACTGGCTGACCGTCGTCGTTCTCGTCAGATCCAGGTTGGTTCTGTTGCTGTTGGTGGTGACGCTCCGGTTTCTGTTCAGTCTATGACCACCACCGTTACCGCTGACATCGGTGCTACCCTGCAGCAGATCGCTGAACTGACCGCTGCTGGTTGCCAGATCGTTCGTGTTGCTTGCCCGTCTCAGGACGACGCTGACGCTCTGCCGGTTATCGCTCGTAAATCTCAGATCCCGGTTATCGCTGACATCCACTTCCAGCCGAAATACGTTTTCGCTGCTATCGACGCTGGTTGCGCTGCTGTTCGTGTTAACCCGGGTAACATCCGTCAGTTCGACGACAAAGTTAAAGAAATCGCT…
Streptomyces coelicolor A3	-	NP_629824.1	ATGACTGCTATCTCACTGGGCATGCCGGACGTACCGACTAGACTGGCGGAACGCCGCAAATCACGCCAAATTCAAGTTGGCCCTGTTGCGGTGGGTGGTGACGCGCCTGTTAGTGTCCAGTCTATGACTACGACCCGCACAAGTGATATTGGCGCCACTCTGCAGCAGATCGCGGAACTTACTGCATCTGGCTGTCAGATTGTCCGTGTTGCGTGTCCGACACAGGATGACGCCGATGCACTGCCAGTCATCGCACGGAAAAGCCAGATCCCGGTTATAGCGGATATTCATTTTCAGCCTAAATATGTTTTTGCAGCGATTGAAGCGGGCTGTGCGGCGGTACGCGTAAACCCGGGTAACATCAAACAGTTCGACGATAAAGTAAAAGAAATTGCTAAG…
Synechocystis sp. PCC 6803	-	WP_010872347.1	ATGGTTACCGCTTCTCTGCCGACCCCGGTTCAGCCGGAATTTGACACCACCATCCACCGTCGTAAAACCCGTCCGGTTCCGGTTGGTGCTGTTACCGTTGGTGGTGGTCACCCGGTTGTTGTTCAGTCTATGATCAACGAAGACACCCTGGACGTTGACGGTTCTGTTGCTGGTATCCGTCGTCTGCACGAAATCGGTTGCGAAATCGTTCGTGTTACCGTTCCGTCTATGGCTCACGCTAAAGCTCTGGCTGACATCAAACAGAAACTGCAGGCTACCTACCAGGCTGTTCCGCTGGTTGCTGACGTTCACCACAACGGTATGAAAATCGCTCTGGAAGTTGCTAAACACGTTGACAAAGTTCGTATCAACCCGGGTCTGTACGTTTTCGAAAAACCG…
Thermosynechococcus elongatus BP-1	-	WP_011056840.1	ATGCAAACCTTGCCTTCGCCGGTCCAGGCCACACCGACGGAAACCGCTATCGTTCGTCGCAAAACTCGTCCCGTACCGATCGGCTCTGTGGTGATTGGCGGGGGTCATCCGGTGGCCGTCCAGTCTATGATCAACGAGGATACCCTGGACATTGAAGGCTCCGTGGCCGCGATCCGCCGCCTCCATGAAATTGGGTGTGAAATAGTCCGTGTCACAGTGCCCAGTCTTGCACACGCAAAGGCCATGGAGGAGATCCGCGATCGATTATACAAAACGTATAAGCCGGTGCCACTCGTTGCAGACGTGCATCATAATGGCATGAAAATTGCTCTTGAGGTAGCAAAGTACGTAGACAATGTCCGCATCAATCCGGGGCTCTACGTATTCGAGAAACCAAAA…
Thermotoga maritima MSB8	-	WP_004080695.1	ATGCGTAAATCTGTTAAAGTTGGTAAAGTTGTTATCGGTGGTGAAGCTCCGGTTTCTGTTCAGTCTATGACCACCACCAAAACCGCTGACGTTGAAAAAACCGTTTCTCAGATCAAATCTCTGGAACGTGCTGGTTGCGAAATCGTTCGTGTTGCTGTTCAGGACGAAGAAGACGCTAAAGCTATCCGTCGTATCAAAGAACAGATCGAAATCCCGCTGGTTGCTGACATCCAGTTCGACTACCGTCTGGCTATCCTGTCTATCGAAAACGGTGCTGACAAAATCCGTATCAACCCGGGTAACATGTCTCGTGACCGTCTGAAAGACGTTGTTGCTGCTGCTAAAGGTAAAGGTATCCCGATCCGTGTTGGTGCTAACGTTGGTTCTATCAAACGTCGT…
Thermus thermophilus HB27	-	WP_011174043.1	ATGGAGGGCATGCGTCGTCCTACGCCGACGGTGTATGTGGGGCGCGTACCTATCGGTGGCGCTCACCCGATCGCCGTGCAGAGCATGACTAACACGCCTACCCGTGACGTGGAAGCGACAACGGCCCAGGTTTTGGAGCTTCACCGTGCGGGGTCTGAAATTGTGCGCCTGACCGTCAATGATGAGGAAGCCGCCAAAGCGGTGCCGGAAATCAAACGACGCCTGCTGGCAGAGGGTGTCGAAGTGCCGCTGGTTGGTGATTTCCATTTCAACGGCCACCTCTTGCTGCGCAAATACCCGAAGATGGCAGAAGCGTTGGACAAATTTCGTATTAATCCGGGAACGCTGGGTCGCGGGCGCCACAAAGATGAACATTTCGCGGAAATGATCCGCATTGCC…
Treponema denticola ATCC 35405	-	WP_002678768.1	ATGAATTCAATTAAACTGCCGCGTACCATACATATCGGCGGGAAAGGTCAAGTCAAAAAACTCACGCTGGGTGGCACATCGCCGATCCTTCTGCAGACCATGTGGAAGGAAAGCCTCCTTGGTGCTGATCTGCTATCGATTGTGAAGAGCCTGAACGAGCTCGAACAACTAGGCTGCGATATCGTCCGCTTTGCCGTGCCAGATATGGATTCTGCCGAACAGTTTGTTAAACTGACGCGTCTGACGGAAATGCCGCTGGTGGCGGACATTCATTTCGATTACAAACTCGCCCTCCGTTGCATGGACGGGGATACCGCAAAAATCCGTATTAACCCGGGTAACATCGGTTCCAAAGAAAAGACGGAAGAGGTGATTCGTAAGGCCAAAGATACGGGCACC…
Verrucomicrobium spinosum	-	WP_009965977.1	ATGCATCCGCTGCAGTATTGTCCCGACTTGTACCATTACCAGCGACGTGAAACCCGCGAGGTGCGTGTCGGCAAAGTTGGCATCGGTGGTGGTAATCCAATCCGTGTACAAAGCATGCTGACTAGCGATACCCGCGACACTGAAGCCTGCATCCAGCAAACGTTGGATTTGGTTGCCGTAGGTTGTGAAATTGTGCGCATCACAGCTCAGACCAGACCGATTGCCGAAAACTTGCAGAATATCAAGGCAGGCTTATTAGCCGCGGGTTGCGATGTCCCTCTGGTAGCGGATATCCACTTTAAACCGGACGCGGCTATGGAAGCTGCGAAATGGGTGGAGAAAGTGCGTGTTAACCCAGGCAATTTTGTTGATAAAAAAAAGTTCGCCATCCGCGAGTAC…
Totals:	6 (+), 2 (+/-), 50 (-)
NadA orthologs
Organism Name	Complementation Results	NCBI ID	Nucleotide sequence
Arcobacter butzleri	-	WP_020848486.1	ATGAATTTGAAAGAAGAGATTAAAAAATTGAAAGAGGAACTGGACGTGACGCTGGTTGCTCATTTTTACCAACGCGATGAAGTGTTTGAATTAGCTGATATTACCGGCGATTCGTTGGAGCTTGCAAAAAAAGTAATGAATACAAATACCAAATTTGTAGTGTTTTGTGGCGTCGGTTTCATGGGTGAGAGTGTAAAAATCATGTCCCCACAGAAACGCGTGCTGATGCCAAAGGTAGCATGCTGCGCAATGGCACGCATGATCGACGAAGGCTATTTCGAGCAGAACTTGAAAAAGATTAATGAAGCAGGCATCCCTAATGAAAATATTTTGCCAATTACCTACATTAATAGCAGCGCCCGGGTTAAAGCGCGCGTGGGCATGATGGGGGGCATGGTT…
Bacillus subtilis subsp. subtilis str. 168	-	WP_003229691.1	ATGTCAATTCTTGATGTGATCAAACAATCGAATGATATGATGCCCGAAAGTTATAAAGAACTATCGAGAAAGGATATGGAAACGCGCGTTGCCGCCATTAAGAAAAAGTTCGGCAGCAGGCTCTTTATACCAGGCCATCATTATCAAAAGGATGAAGTGATACAATTTGCTGACCAAACAGGCGACTCCCTGCAATTGGCCCAAGTAGCGGAAAAAAACAAAGAAGCGGATTATATCGTATTTTGCGGCGTTCACTTTATGGCAGAAACCGCCGATATGCTGACAAGCGAGCAGCAAACGGTCGTCCTGCCAGATATGAGAGCTGGATGTTCTATGGCTGACATGGCTGACATGCAGCAGACCAATAGGGCATGGAAGAAGCTTCAGCATATATTTGGA…
Chromobacterium violaceum ATCC 12472	+	WP_011137225.1	ATGACCAAACGCGTCGTCACGCTCGCGCATTACTACACTCAGCCTGAGATCCAGCAGATGGCAGATAAAGTAGGTGACAGTCTGGAACTTAGCTTGTATGCCAAAGAGGCCCAGGCGGATATTATAGTATTTGCGGGCGTGCGATTTATGGCGGAAACAGCCAAAATTCTGAACCCTGAAGCTACAGTTATCCTGCCTGATGCAGGCTCTACCTGCAGTCTGGTGACTCAAACCGATGTGGCAGAATTGACACAATGGCGTAAGCGCTATCCGGATCACGTTCACGTTAGTTACATAAATTCTAGCGCTGAGCATAAAGCGGTCTCAGATTGGATTGTGACGTCCCGGAATGTTGACGATATTATCGCCCACTTATATGCGGAAGGCAAGCAGGTTATC…
Coraliomargarita akajimensis DSM 45221	+	WP_013044705.1	ATGGCCACCGAAACCCTTAACTATGAACCTATGGTTTTCAACCCGCTGAATGAAGAGGCGCCGTTGTCTGCCATCCAGGAGGAAATCTTGCGTCTGAAAGAGGAAAAAAACGCGGTTATTTTAGCTCATAATTACCAAGTGGATGAGATTCAACGTGTGGCAGATTACGTTGGCGATTCGCTGGGCCTTGCATATCGCGCTGAAGAAGCGGATGCAGATGTGATTGTTTTTTGTGGCGTTCACTTCATGGCCGAGACGGCCAAGATTGTTAACCCCGCCAAAAAGGTCATCCTCCCCGATATGGAAGCGGGCTGCAGTCTGGCCGACAGCTGTCCGGCCGAACAACTGGCCGCCTATAAAGAAGCCAATCCTGACACCTACGTCGTTGCGTATATCAAT…
Crocosphaera watsonii WH 8501	-	WP_007304059.1	ATGTTTACCACTGTACGCCCCACAAGACCACAACCGGCGATTGCACTGCCGAAGGACCTGTTTTGCGCAATTGATGAGCTGAAGCGCGAGCTGAAAGCAGTTGTGCTTGCGCATTATTATCAAGATCCTGACATTCAGGACATCGCAGACTTCATCGGCGATTCACTGGGTCTGAGTCAGCAGGCAGCAACTACTGATAAAGAAGTAATTGTTTTTGCGGGTGTGCACTTTATGGCCGAAACTGCCAAAATTTTAAACCCTGATAAATTGGTGTTACTCCCTGACTTAGAAGCTGGCTGTAGCTTGGCCGATAGTTGTCCACCGAAAGAGTTTGCGGAGTTTAAAGAACAACATCCAACGGCCATTGTCGTGAGCTATATCAACTGCACCGCCGACATT…
Crocosphaera subtropica	+	WP_009545126.1	ATGTTCACTACCGCAAAACCTATTCCAAGTCAAGCATCTAATTCACTGCCGAAAGACTTGTTTAGCGCCATCAATGAGCTTAAAAAAGAATTGAAGGCCGTGATTTTAGCGCACTACTATCAAGATCCGGACATCCAAGACATTGCCGATTATATTGGTGATAGCTTAGGGTTGTCACAGCAGGCCGCGACCACCGATAAAGAAGTAATTGTATTCGCGGGTGTACATTTTATGGCGGAAACTGCCAAAATTCTGAACCCGGATAAACTGGTTTTACTGCCGGATCTGGAAGCAGGCTGTAGCCTTGCGGACAGTTGCCCCCCAGAAGAATTTGCCCAGTTCAAAACCCAGTATCCGGACGCGATCGTGGTGAGCTACATCAATTGTACGGCAGACATC…
Deinococcus geothermalis DSM 11300	+/-	WP_011530298.1	ATGACCAAAATTCACCCGGTTGTACCGCCGACTCAGATTCCTCATCGCGACCTGCTGCAGCTGGAAGTCTTGCCGGACGAAGAGCAGATTCGTGCAGATATTGAGCGTCTGCGTAGAGAGCGCAACGCGGTGATCTTAGCGCACAATTACCAGCGACCAGAAGTCCAAACCATTGCGGATTTTGTCGGAGATTCACTCGGGCTGAGTCGCCAGGCCGCCAACACGGAGGCTGAGGTGATTGTATTTGCCGGTGTCCACTTCATGGCCGAGACGGCAGCAATTCTTAACCCCGGCAAAGTAGTTCTGCTGCCGGACTTGAGAGCCGGTTGTAGCCTTGCAGATACGCTGACCGCACAGGGCATTCGAGATTGGAAGGCGCGCAACCCAGGTGGTCTGGTC…
Desulfitobacterium hafniense DCB-2	-	WP_015943096.1	ATGTACACGATGCAGCAACCGCTGCCCGCCGAATATCTTTCTCTGTCAGAGGAGGAAATGGATCGTCGCATTCGTAAAGTGAAAGAAGATTTGGGCTCGCGTTTGTTGATCCTAGGACACCATTATCAGCGTGATGAAGTGGTGAGATATGCGGACTACCGCGGCGATTCGCTGCGCCTCAGTCAGTTAGCGGCCCAGGCTGAAGCTGAGTACATCGTTTTTTGCGGAGTGCACTTCATGGCAGAAACGGCGGATATCCTGACCGTGCCGGAACAAAAAGTCATTCTGCCGGATCTAGGTGCCGGTTGCCCAATGGCTGACATGGCTGATATTGAAGATGTGGAACGCTGCTGGGAACAACTTGTCGCGCAATACGACGAAGAATTTGTCCCTGTCACG…
Gemmata obscuriglobus UQM 2246	+	WP_010044270.1	ATGAGCGTTGTTTCTCCGGCAGAACCGCGTGGCTTAGCCCCCGCTGGTTCCGGCCCGACCAGTGTCAGCCTGCTTGACGACGTGTCAGCGGAAATCCTCGAACTGAAGAAAAAACTGGGGGCCACTATCCTGGCGCATTACTATCAGGAAGGGGAGATTCAGGCGTTAGCCGATATTACTGGTGATAGCCTGAAACTGGCGCGCGAAGCCACCAAAGTTGATTCACCTGTCATTGTGTTTTGCGGCGTTCTGTTTATGGCTGAGACCGCGAAGATGCTGAACCCCACGAAACGTGTGCTGCTGCCCGATCTTAGAGCAGGTTGCTCGTTGGTGGATGCCTGCCCCGCCGACAAGTTGGAACGCTATCAAGAACGACTGCGCGAGAATGGGCGCAAATTT…
Geobacillus thermodenitrificans NG80-2	-	WP_011887898.1	ATGAACGTTCTTGAGCAATTCAAACAGCTGGATAATATGCCGGAACAATATAAAACTATGGACCGGGATGAACTGGAAGCACGCGCTCGCGCGGTTAAGGAACAACTGGGACGGCGCCTGTTTATTCCGGGCCACCACTATCAGAAAGATGAAGTTATTCAGTTTGCCGATGCCACGGGGGATAGCTTGCAACTTGCCCAGTTGGCTGCCAAAAACAACGAAGCAGAATATATTGTATTCTGCGGTGTGCATTTTATGGCTGAAACCGCCGATATTCTTACGTCGGAAGAACAGACCGTCATACTACCTGATCTACGCGCAGGCTGCAGTATGGCTGATATGGCTGATGTGTTTCAGGTTGAACGTGCATGGGCGGCACTGACAGATCGTTTTGGGGAA…
Heliobacterium modesticaldum Ice1	-	WP_041313434.1	ATGTCCGATGCAGTGGCGAAGCTGAAGAAGGAACGTAACGCCGTCATCCTCGCGCATGTTTATCAACGGCCCGAAGTCCAGGATGTAGCCGATTTCGTGGGGGATTCACTGCAGCTGGCCCAGCAGGCAGCCAAAACTGATGCCGACGTGATTGTCTTCTGTGGTGTTCATTTTATGGCTGAATCTGCCGCGATTCTTAGTCCGAACAAAATAGTCTTACTACCGGAAGAGAATGCAGGTTGCCCTATGGCTGATATGGTCACAGCAGATGCGTTACGCCGCCGCAAAGCGGAAATTCCGGGTGTGCAGGTAGTTGCTTACGTGAATACTTCAGCCGCGGTAAAAGCCGAGAGTGACATTTGCTGCACTAGTGCAAACGCGCTGAAAGTTGTCTCAGCT…
Herminiimonas arsenicoxydans	+	WP_011870605.1	ATGCAAACTCAATTTATCAAGACCATTGAATTTGAACGCCCGGGAATGGAATCAGGAAGCTCCTGCGTGGCCCACGCATGGGCGCGCACACCTGCCACACCATCCCCGGAAGAAAAAATTGCCTTAAAAGACCGTATTCGCCACCTCCTTAAGGAACGCGAGGCTGTCTTAGTTGCGCATTACTATGTAGATGCGGACCTCCAGGATTTGGCCGAGGAAACTGGCGGCTGTGTGTCCGATTCTCTGGAGATGGCACGTTTCGGCCGCGATCATCCTGCCAAAACTCTGGTTGTTGCCGGCGTGAAGTTCATGGGGGAGACCGCCAAGATTCTGAGCCCAGAAAAGACTATCCTCATGCCGGACCTCGACGCGACCTGCTCGCTGGACCTGGGCTGCCCC…
Isosphaera pallida IS1B	+	WP_013565574.1	ATGAGTTCGGCTGTGACCAGTTCGCGCCTGCATGTGATTCCGCTGGATGCCCAGGAAGCCCTGGAGGAGGAAATTCTGGCATTAAAGGCACGGGAGGATGCTACCATTTTAGCCCATTATTACCAAGATGGGACGATTCAGGAACTCGCTGACTTTACCGGAGACTCTCTATCGCTTGCCCGTGCGGCGTCCCGCGTTAGCACCGGCACGATCGTTTTTTGTGGGGTCCACTTCATGGCAGAAACTGCAAAAATGCTCAATCCGGACAAACGGGTTCTATTACCGGATCTCCTGGCCGGCTGTTCTCTGGCCGATAGCTGCCCGGCGGATAAATTAGCTGCTTATCAGGAGAGCCTGCGTGCATCGGGTGTTCGTTTTCAGACGGTTACCTACATCAAT…
Methylacidiphilum infernorum V4	-	ACD82066.1	ATGTCGCTCAAAAAAATGGGCATTGAAGAAAAGAAAGAACGTGTTCTGAAGCTGAAAAAAGAAAAAAATGCACTTATTCTTGCACATAACTACCAATTGGCAGAGATTCAAGACGTAGCAGATTTCGTAGGCGATAGTCTTGGCCTGTCATTCAAAGCCCGAGAGGCCACCCAGCAGCGCATCATTTTTTGCGGAGTTCATTTTATGGCGGAAACAGCTAAAATTCTGAATCCAAATCGCAAAGTGATTTTGCCAGATATCGAAGCGGGGTGTAGCCTGAGCGACTCTTGTTCCTACGAGGATCTGCTGGAATACAAAAAAGAAAACCCGACAACCTTCATCGTTGCCTACGTGAATACCAGCGCAGCGGTTAAGTCACTGTCAGATTGTATCTGTACG…
Methylobacillus flagellatus KT	-	WP_011480599.1	ATGCAGGCAACCTTGGAAACAACCGAGCGACCGGCGAACACCTTGACTGCAGCCCCCATTAAATTCGAACGGTTTCAGGCGGCCCAGGAAGCTGAATTACAAGCGCGTATCATCGCTGCGAAAAAGAAGCTGGGGAACCGTCTGGTGATCCTGGGACACCATTATCAGCAAGAGAGTGTATATAGACATGCGGACTATACCGGCGATTCGCTTAAGCTCTCACGCTTTGCCGCTGAAACAGACGCAGAATATATCGTATTCCTGGGTGTGCACTTTATGGCTGAGGTAGCAGACATTTTAAGTCGCCCTGAGCAAATCTCTATCTTGCCCGACCTATCAGCTGGCTGCAGCATGGCGGATATGGCCAACCTGGCAAAAGTTGAGCGTTCGCGTCGAGAG…
Mycobacterium smegmatis str. MC2 155	-	WP_003894588.1	ATGACCGTCCTGAACGGTACCCCGGCTGGCGCACTCGCCGATCGTATCGTTGATGGCCCTGGGGGTTACAGCGGGATTGACGGGGATGAGCAGTGGGCAGCGGAGGTGCGGAGATTAGTCGAGCTGCGCGGTGCGACGTTGCTGGCGCACAATTACCAACTGCCAGCCATCCAAGACGTCGCCGATCACGTTGGTGATTCCTTAGCGCTGAGCCGCATTGCGGCGGAGGCACCCGAAGACACCATCGTCTTTTGCGGCGTTCACTTTATGGCCGAAACCGCTAAAATCCTTTCTCCAGATAAGACCGTCCTGATCCCGGATCAGCGCGCGGGATGTTCCCTGGCTGATAGTATTACGGCAGAAGAACTGCAGGCTTGGAAAGATGATCACCCGGGCGCC…
Nitrospina gracilis	+	WP_005006700.1	ATGATCACCCTGGATGAACTGTATGAGAAGCTGAAACCGATTCGCGTCGGTAACCCGATTTGCGAATTTACCCGCGAACACTGTGAACGTATCTGGCCTACAATTGAACGCATTCGTGAACTGAAAAAAGAGAAAAACGCCATAATCCTGGCCCATAATTATGTGGAACCGGAGGTCCTGTATGGTGTAGCCGATTATTCCGGTGACTCATACGGCTTGAGCAAAAAAGCGAAGGCTTCCGATGCCGATGTTATCGTCTTCGCTGCCGTCCGCTTTATGGTGGAAACGGCCAAAATCCTGAACCCGGAGAAAACGGTTCTGGACCCAAACCCGAATGGGGGTTGTAGCTTAGCCGACGGTATTATGCCAGCGGATGTTAAAAAATTACGTAAACAGTAT…
Novosphingobium aromaticivorans DSM 12444	-	WP_011443752.1	ATGACTGTACAGCCGGCCAACCTGTCTGGTCTGGACCTTCGCGCCGAAATCGACCGTCTGCGAAAGGAACGCAAAGCGGTCATCCTCGCCCACTATTATCAACGTCCTGAGATTCAGGACTTGGCGGACTTTGTCGGTGATTCGCTGGAACTGTCGCGTAAAGCGGCAGCAACGGATGCCGAGGTGATTGCATTCTGCGGCGTGAAATTTATGGCCGATACAGCAAAAATCCTGTCGCCAGAAAAAATCGTTGTTTTGCCGGACTTGGACGCAGGGTGCAGCCTTGAAGATAGCTGCCCGCCAGATAAATTTAAAGCCTTTCGTGAGGCCCATCCGGATCACATCGCTCTTACGTACATAAACTGCAGTACAGAAGTGAAAGCGCTTTCAGATGTCATC…
Pirellula staleyi DSM 6068	-	WP_012911310.1	ATGTCGTTGGTGATAGCGCCGCGCTCTACGGCGGCCGTCCTCCCGTACAAATCTTTATCGAACGAAGAACTGAGCTCGCGGATTGAGGCTGTTCGCAAACAGCTGGGCTCGCGCCTGATGATACTGGGCCATCACTATCAACAGGACGAGGTTATTAAGCATAGTGACCTGCGCGGTGATTCTTACCAGCTCTCGCAGATGGCCGCCGCATCTAGCGATTGCCGCTATATTGTGTTTTGTGGAGTCCACTTCATGGCGGAAACCGCGGACATACTGGCGAACCGTCCGGAGAAGCTGGAGGCGCGCGGGGGTGAACGTGTGACGGTTGTTCTGCCCGACATGGCCGCCGGCTGCAGCATGGCTGATATGGCTGCGATCGAACAAGTGGAAAATGCGTGG…
Rubinosphaera brasiliensis	+	WP_013631006.1	ATGACGCTACCAGTAGTCGACAAGCAGGAAGTGTATGAAGATCCGCTGGATCTGATGGACGAGATTGATAGATTGAAAGTGGAGAAACAGGCCAAAATTTTAGCGCACTATTACGTCGATGGTGACATTCAGGATATTGCAGATTATGCCGGCGACAGCTTAAAGCTGGCGCGTGATGCCGCGAGCATTGATGATCCAACAATTGTTTTTTGCGGCGTTCATTTTATGGGTGAATCTGCTAAAATCTTGTCTCCGGAAAAAACCGTCTTAATGCCGGATCTGCAGGCTGGCTGCTCCCTGGCTGAGAGTTGTCAGGCACCGGACCTCAAAGCTTACCAGGAAAAACTGCGTGCTGAAGGGCATGATGTCGTTACCGTGGCGTATATCAACACCTCTGCA…
Rubrobacter xylanophilus DSM 9941	+/-	ABG03084.1	ATGCGAGCGGCGGGTGCGGTGGTTTCGGCAGTCGAGGGTTTAGATTTATTTGAAGAAATCGATCGTCTGCGCGAGGAATTGGGCGCGGTTATTCTGGCGCACTACTACCAGGAACCGGAAATCCAGGATATTGCGGATTTCATCGGAGATAGCCTGCAGCTGGCTCGTCAGGCGCAACGTACAGATGCGCGCGTTATCGTGTTTTGCGGCGTACACTTCATGGCAGAAACCGCAAAAATCCTGAACCCGGAAAAAACCGTGGTGCTGCCGGATCTTGAAGCGGGTTGCTCCTTAGCAGATTCGTGCCCACCGGAGCGTTTCGCGGCTTTTCTTGAAGAACACCCGGGTCACGCGGTTGTGAGTTATGTGAATACCTCTGCGGCGGTGAAAGCGTTGTCG…
Streptomyces cattleya DSM 46488	-	WP_014142046.1	ATGACCACCACCGAACCGCTGGACGTTCAGCCGACCCCGCTGGCTCTGCTGCTGCTGGGTCGTGAAGCTGACCCGCGTTCTGAACGTGGTGTTGAATGCCCGGGTGACCTGCCGGCTCCGTCTGACCCGGACCTGGTTGAACGTGCTCGTAAAGCTAAAGCTTCTCTGGGTGACCGTGTTTTCGTTCTGGGTCACCACTACCAGCGTGACGAAGTTATCGAATTTGCTGACGTTACCGGTGACTCTTTCAAACTGGCTCGTGACGCTGCTGCTCGTCCGCAGGCTGAATACATCGTTTTCTGCGGTGTTCACTTCATGGCTGAATCTGCTGACATCCTGACCTCTGACGACCAGCGTGTTATCCTGCCGGACCTGGCTGCTGGTTGCTCTATGGCTGAC…
Streptomyces coelicolor A3	-	WP_011028171.1	ATGACCACGGCACAGACTCAGGAGTTAGACGTGCAGCCCACTCCACTCGCATTATTACTGCTGGGACGTGAAGCAGATCCACGTTCGGAGCGCGGTGTAGAATGTCCGGGCGACCTCCCAAGCCCGAGTGACCCTGACTTGGTGGCCCGTGCTCGTGCCGCGAAAGAAAAACTGGGTGATAAAGTGTTCGTGTTGGGGCACCATTATCAACGTGACGAGGTAATTCAGTTTGCAGATGTTACCGGTGACTCATTTAAACTGGCCCGTGATGCAGCGGCCCGCCCGGAAGCTGAATACATCGTGTTCTGTGGTGTCCATTTTATGGCTGAATCGGCGGATATCCTGACGTCTAATGATCAGAAGGTGGTTCTGCCGGATCTCGCGGCGGGTTGTTCAATG…
Sulfurospirillum deleyianum	-	WP_041666401.1	ATGAAAGAGGAAATCCTGAAATTAAAGGAAGCCCTGCATGTGTCAATCGTCGCTCACTTCTACCAAAAAGACGAAGTGTTCGAGCTGGCTGACTACGTTGGCGATAGCCTGCAACTGGCCCAATGGGCCGCCAAGGATGCCAACCCATACCTGATTTTCTGCGGCGTTGGCTTTATGGGCCAGAGTGTTAAAATTCTGGCTCCGGAAAAACGCGTAATGATGCCGAAGATCGCATGCTGTGCGATGGCACGCATGATTGATGTGGAATACTTCGACCAGAATGTTGCTCTGTTGGAACAGTCTGGCATCGCAAAAGAGGCCATCCTCCCGGTGACCTATATTAACTCTTCCGCAGAGGTCAAGGCTGCGGTGGGGAAGATGGGTGGTTATGTGTGTACC…
Thermus thermophilus HB27	-	WP_011173065.1	ATGGGCCGGATGCGTGGCGAAGCGCTGGCGCAGGAAGTGCTGCGACTGAAACGTGAACGCAACGCGGTTATCCTCGCCCACTCGTATCAGCTCCCTGAAGTGCAGGAAGTGGCCGATTTCGTTGGTGACTCGCTGGGACTGGCTCGGGAGGCTCAGCGTACCCGTGCCGAAGTGATCGTGTTTTGTGGCGTTCATTTTATGGCGGAAACGGCAGCAATCTTGAATCCGGAGAAAACTGTTTTGTTACCCGACTTGGAAGCGGGCTGCTCGTTGGCGGACTCGATTCGTCCGGAAGATGTACTGGCGTGGAAAGCGAAACATCCGGACGGCATTGTGGTGGCGTATGTAAATACAAAAGCCGAAGTTAAGGCGCTGGCAGATGTTTGCGTAACCAGCGCC…
Verrucomicrobium spinosum	+	WP_013565574.1	ATGGTTCAGATCGCTGCACCGTCAATCACCGAGGAGATTCTGCGCTTAAAAAAACAACGCAACGCCATCATCCTGGCGCATAACTATCAGTCGCGAGAGATTCAGGAACTGGCAGATTTTGTGGGCGATAGCCTGGGGCTGGCTTACAAAGCAAAAGAAACCAAAGCAGATGTGATATGCTTTTGCGGGGTCCATTTTATGGCCGAAACCGCCAAAATCGTTAATCCGGAAAAAATTGTGGTGCTGCCGGACGCCAATGCAGGGTGCAGCCTGGAGCAGTCCTGTCCGGCACCCCAGCTGGAAAAATTCCTGGAAGTTCATAAGGAAAAAAATTATTATGTCATCGCGTACATCAACTGTAGCGCGGGGGTGAAAGCGTTGTCAGACTGTATCTGCACG…
Totals:	9 (+), 2 (+/-), 15 (-)
