# Supplementary material for: Cellular assays identify barriers impeding iron-sulfur enzyme activity in a non-native prokaryotic host
Source: eLife. 2022 Mar 4;11:e70936. doi: 10.7554/eLife.70936 (PMC8896826; doi:10.7554/eLife.70936)
Supplement: Supplementary file 4. [file elife-70936-supp4.xlsx]

## Sheet: Feuil1
Supplementary File 4. Sequences used to create a phylogenetically-representative selection of NadA and IspG orthologs.
NadA orthologs
Organism Name	NCBI ID	plasmid	Nucleotide sequence
Acidimicrobium ferrooxidans DSM 10331	ACU53899.1	pNadA01	ATGCGTCTGTCTTCTAGCGCATCTACGGCAACAAAACCGACGTTGGGAGTGGGCGGTCCGACCCCGTCTGCGGAAGTCTTGGAACGCCTGCGTGCAGCGAAAGCGCTCGCCACGGATGCCCTGCTCATTGCGCATAATTATCAGCCGCCGTGGGTCCAGGACTTAGCCGACGTCACTGGTGATAGCCTGCAGTTATCACGCATTGCAGCCGAACACCCAGCGCGTCGCATTGTGTTCGCGGGCGTGCGCTTTATGGCTGAAACGGCAAAGTTACTGTCGCCGACGAAAACCGTACTCTTACCGGCTCATGACGCGGGTTGTTCCCTTGCGGAGGCCATTACCGCCGATGACCTGCGGCAGTGGCGCAGCGCACATCCCGATGCGATCGTGGTGGCCTAT…
Aeromonas hydrophila	ABK37682.1	pNadA02	ATGGATTACCCTTTCCCGGCAAAACCTCTGCCTTTAAGCGCAGAACAGAAAACAACTCTGATCGCTGACATTAAGGCCCTGCTGAAGGAACGCAAAGCCGTGCTTGTCGCGCATTATTACACCGACCCGGAAATTCAGGCCCTGGCTGAAGAAACCGGTGGTTTTGTTGGGGATTCACTGGAAATGGCTCGTTTTGGCCGGGATCATGAAGCACAAACCCTGATTGTAGCGGGAGTGCGCTTCATGGGCGAAACCTCAAAAATTCTGTCGCCGCACAAGCGTGTGCTGATGCCAACCTTAGAGGCAGAGTGCAGTCTGGATCTGGGCTGCCCGATTGAACAATTCTCAGCCTTTTGTGATGCTCACCCGGATCATATTGTGGTGGTCTACGCGAACACC…
Allochromatium vinosum	ADC62035.1	pNadA03	ATGACCAACCCCTCCTCGGAAGCCTTACCGATCCGTTCGATCGACGTTCCGCCGCACCCACAGTGGCCGGAACTTAACGCTGCGGAACGGACCGATCTCCGCTCTCGCATTCGCCGCTTGTTAGCGGAGCGGAATGCAGTCCTGGTTGCTCATTATTACACGGATCCAGAACTGCAATCGCTCGCGGAAGAGACCGGAGGCTATGTGGCGGATTCTCTTGAAATGGCACGCTTCGGCACCGAAACAGACGCGGAGACTCTGGTTGTTTGCGGTGTTCGTTTCATGGGAGAAACTGCGAAAATCCTGAATCCAGAGAAACGTGTACTGATGCCGGATCTGCGCGCCACCTGCTCACTGGATGAGGGCTGCCCGGCAGATGAATTCACAGCTTTCTGCGAC…
Anaeromyxobacter dehalogenans 2CP-C	ABC83113.1	pNadA04	ATGACGCTTCCAGTGGTTCCAATCCATGATCCGGTAGCGAACCCTGTAACAGGTAGTGATCTTCCAGCGGGCGAGGTTGCCGGATTAGAGGCCGAAATCCGTGCTCTGGCCAAGGAGAAAGATGCGGTTATTTTAGCGCATAATTACCAGCTTCCCGAGGTTCAAAATGTGGCGGATCACGTCGGCGATAGCTTACAGTTGGCCATTGTTGGTCAGAAAGTACCACAGTCAACGATCGTATTCTGCGGAGTGCACTTTATGGCCGAGTCGGCTAAGGTGTTGGCGCCTGACAAGCGTGTACTTTTACCAAACTTATCAGCCGGCTGTTCCTTAGCCGATTCAATTACAGCCGAAAGCCTGGAAGATTGGAAGGCGCGTTATCCAGGACACGCAGTGGTC…
Arcobacter butzleri	WP_020848486.1	pNadA05	ATGAATTTGAAAGAAGAGATTAAAAAATTGAAAGAGGAACTGGACGTGACGCTGGTTGCTCATTTTTACCAACGCGATGAAGTGTTTGAATTAGCTGATATTACCGGCGATTCGTTGGAGCTTGCAAAAAAAGTAATGAATACAAATACCAAATTTGTAGTGTTTTGTGGCGTCGGTTTCATGGGTGAGAGTGTAAAAATCATGTCCCCACAGAAACGCGTGCTGATGCCAAAGGTAGCATGCTGCGCAATGGCACGCATGATCGACGAAGGCTATTTCGAGCAGAACTTGAAAAAGATTAATGAAGCAGGCATCCCTAATGAAAATATTTTGCCAATTACCTACATTAATAGCAGCGCCCGGGTTAAAGCGCGCGTGGGCATGATGGGGGGCATGGTT…
Bacillus subtilis subsp. subtilis str. 168	CAB14745.1	pNadA06	ATGTCAATTCTTGATGTGATCAAACAATCGAATGATATGATGCCCGAAAGTTATAAAGAACTATCGAGAAAGGATATGGAAACGCGCGTTGCCGCCATTAAGAAAAAGTTCGGCAGCAGGCTCTTTATACCAGGCCATCATTATCAAAAGGATGAAGTGATACAATTTGCTGACCAAACAGGCGACTCCCTGCAATTGGCCCAAGTAGCGGAAAAAAACAAAGAAGCGGATTATATCGTATTTTGCGGCGTTCACTTTATGGCAGAAACCGCCGATATGCTGACAAGCGAGCAGCAAACGGTCGTCCTGCCAGATATGAGAGCTGGATGTTCTATGGCTGACATGGCTGACATGCAGCAGACCAATAGGGCATGGAAGAAGCTTCAGCATATATTTGGA…
Bdellovibrio bacteriovorus HD100	CAE81099.1	pNadA07	ATGAGTTACGATATTGCCGCAGACATCCAACGTTTAAAGAAGGAAAAGAATGCGGTGATTCTTGCGCACTACTATGAGGATGGCGATATCCAGGATATTGCGGATTATGTTGGAGACTCCTTTTACTTAGCGAAGATGGGCCAACAGGTACAACAAGACACGATTTTACTGGCTGGCGTGGTCTTTATGGCGGAATCCGTGAAGATTCTTAACCCTACCAAGACGGTCCTCGTCCCGGACATGGAAGCGAGTTGTAGCTTAGTGAAGGGCGCTCCCTATGATCAGTACCTCGCATGGCGCCGTCAACATCCGGACGGCATCGCCGTTACCTACATTAATAGCAGCGCTGAGGTCAAGTCCATCAGTGACGTCATTATCACCTCGTCTAATGCCCAACAG…
Candidatus Fermentibacter daniensis	KZD19396.1	pNadA08	ATGACTGACACCGTTCGTGCGATTGACGATTTACGCCGTCGCCGCCGCGCCGCAATTCTTGCGCATTCGTACCAGCCCGCTGACATCCAAGCCTTAGCAGACTTTGTAGGTGACAGCTTAGAACTTAGCCGTGCCGCCGCCTCAATGGACTGCGAGACCGTAGTCTTATGTGGCGTGCGTTTCATGGCCGAAACCGCGGCCGTGCTGGCGCCTGATCGCACAGTTCTTCATCCGGTACCTGATGCGGGCTGTCCCCTCGCATCGTGTATGGATACCTCAGGTCTGGCGGCGCTCCAAAACGATCACCCGGGCGCCCGTACGGTGGTGTATGTAAATAGTTCGATTGAGGCTAAGGCCATGTCTTGGGCTTGTTGCACGTCGGCCAATGCTACTGCGGTT…
Candidatus Gastranaerophilales bacterium HUM	DAA95005.1	pNadA09	ATGCAAATGGAGCACATTGTCGAGAAGATTAACGCACTGAAGAAGGAAAAGAATGCGGTTATCTTAGCGCACTGCTATCAGCCGGTTGAGATTGACTTAGTCGCAGACTACGTAGGGGACAGTTTGAAATTAAGCCAGGTTGCTGCAGAGACCGACGCGGACATCATTGTCTTTGCGGGCGTCTTCTTTATGGCGCAAACTGCGAAGCTGTTAAGCCCTAATAAGAAGGTCCTGTTACCCCAAATCCATGCAGGGTGTCGCATGGCGGACATGATTTCATATAAGCAATTAAAAGAGTTTAAGGCGATGCATCCTGACATTCCGACCGTTTGCTACGTGAACTCAACGGCAGAGGTGAAAAGCGAGTGCGATATGTGCTGTACGTCGTCGAACGCTATC…
Candidatus Methanomethylophilus alvus Mx1201	AGI85733.1	pNadA10	ATGCAATCCGTGGCACAACAGATTGCGGCACTGAAGAAACAAAAGAACGCCATTATTTTGGCACACAACTACACACTCCCCGAGGTGCAGGACCTTGCAGATTTTGTCGGAGACTCTCTCAGCCTCTCAAAGAAAGCCGCCGCGACCGATGCGGACATCATTGTGTTTTGTGGAGTCTCATTTATGGGCGAGACCGCGAAGATCCTGAGCCCTGGCAAGAAGGTCCTTCTGCCGGAGCCGGAAGCCAAGTGTGCCATGGCCGCTATGTGTAGTGCGGAGCAAATCCGCCAGGTCCGCGCAAAGTATCCTGACGCTGCGGTGGTGGGGTACGTGAACACGGCAGCAGAGACCAAGACCGAGGTTGACTATTGTTGTACATCGGCAAACGCGCTGAATGTA…
Candidatus Pelagibacter ubique HTCC1002	EAS84697.1	pNadA11	ATGGAATTCACCGAAGAAGTCAAAAAAGCGACGGATCCCATCTATCAGAAAATCTCGAAGGTTCTGCCAGAAATTGAATGGTCGGTGCATGCACCGTATATCCATCGTATTAACCAGCTCAAAAAAGAAAAAAATGCCGTAATTCTTGCGCATAACTATCAGACCCCAGAAATCTATCATGGTGTGGCAGACTTCGCAGCGGATTCTCTGGCTCTGGCAGTCGAAGCCTCTAAGACCAGCGCCGACATCATTGTAATGGCGGGGGTTCATTTTATGGCCGAAACGGCGAAGCTGATGTCCCCACAGAAGAAAGTTCTGTTGCCGGACATGTTGGCGGGTTGTAGTCTGAGTTCTTCTATTACGGGTAAGGACGTGCGGCTGCTGAAAGAAAAATACCCG…
Cellvibrio japonicus Ueda107	ACE83018.1	pNadA12	ATGAGCGAGGAACTGAATGTTGCTGTTCGTCTGGACCATTCCCGTGATTTAGTGAAGGAACACTTGGCACGCTTATGGTCCGCGCCGGTTTATACCCCCGAACAGGAGGCCGATTACAAAGCACGCATTAAAGGCCTTCTGAAACAACACAATGCGGTGTTAGTGGCGCATTACTATACCGATCCGCTGATTCAGGCTCTTGCGGAAGACACCGGTGGTTGCGTTTCTGATAGCCTGGAGATGGCGCGCTTTGGTAAGAACCACCCAGCGGAAACATTAATTGTGGCGGGGGTGAAATTCATGGGCGAAACGGCAAAAATTCTGTCTCCTGAAAAACGTGTTCTGATGCCTACCCTGGAAGCGACTTGTTCACTGGATTTAGGCTGCCCCGCCGATGAA…
Chitinivibrio alkaliphilus ACht1	ERP31080.1	pNadA13	ATGGCCGTTGACTATGTTGACACCTTAATCGCGGACATCCGCCGCTTAAAGAAGGAAAAGAATGCGATCATCCTGGCTCATAATTATGTTCTTGGTGACGTGCAAGACGTTGCTGACTTCGTTGGGGATTCGTTAGAGTTGAGTAAGAAAGCGCGCCAAGTAGATGAAGAGGTAATTGTGTTCTGTGGTGTGAGTTTTATGGCCGAGACCGCTAAGATCCTGTCTCCGGAGAAGAAGGTTATCCATCCCGTTACGGCTGCAGGCTGTCCTATGGCAGATATGGCCGATGCCCCGGCTTTACGTCGTTTTAAGCAAGACCATCCCGACGCGGTAACGGTCTGTTATGTTAACAGTAGTGCGAGTCTTAAGGCCGAGGTTGACATCTGTTGCACTAGCTCG…
Chromobacterium violaceum ATCC 12472	AAQ61340.1	pNadA14	ATGACCAAACGCGTCGTCACGCTCGCGCATTACTACACTCAGCCTGAGATCCAGCAGATGGCAGATAAAGTAGGTGACAGTCTGGAACTTAGCTTGTATGCCAAAGAGGCCCAGGCGGATATTATAGTATTTGCGGGCGTGCGATTTATGGCGGAAACAGCCAAAATTCTGAACCCTGAAGCTACAGTTATCCTGCCTGATGCAGGCTCTACCTGCAGTCTGGTGACTCAAACCGATGTGGCAGAATTGACACAATGGCGTAAGCGCTATCCGGATCACGTTCACGTTAGTTACATAAATTCTAGCGCTGAGCATAAAGCGGTCTCAGATTGGATTGTGACGTCCCGGAATGTTGACGATATTATCGCCCACTTATATGCGGAAGGCAAGCAGGTTATC…
Collinsella stercoris DSM 13279	EEA90923.1	pNadA15	ATGCCTTATTTCTTGCAGCAAGATACGATCCGCCGCGAGGATGTCATGACAGAGACGACCAAGAACCCGGCTGTGATGGAGCCAACCGCTTTGGAGCGCGCCTCAGCAGTGCCAGCGGAGACTCGTGCGCGCATCGAGGCGTTGAAAGCTGAACGTGATGCCGTCATCCTGGCGCACTATTACGTTGAGCCGGAAGTACAAGCGGTTGCAGACTACGTCGGAGATTCCTTCTATTTGGCAAAGCTGGCCAAGAGCCTTCCACAACAAACCATTGTTCTGTGTGGCGTTGAGTTTATGGGCGAGAGCGCCAAGCTGTTGAATCGTACCAAAACGGTCCTGCTTCCTGAACCTGCGGCAGACTGCCCCATGGCACATATGGTTCAGCGTGCGACCATCGAC…
Coraliomargarita akajimensis DSM 45221	ADE55989.1	pNadA16	ATGGCCACCGAAACCCTTAACTATGAACCTATGGTTTTCAACCCGCTGAATGAAGAGGCGCCGTTGTCTGCCATCCAGGAGGAAATCTTGCGTCTGAAAGAGGAAAAAAACGCGGTTATTTTAGCTCATAATTACCAAGTGGATGAGATTCAACGTGTGGCAGATTACGTTGGCGATTCGCTGGGCCTTGCATATCGCGCTGAAGAAGCGGATGCAGATGTGATTGTTTTTTGTGGCGTTCACTTCATGGCCGAGACGGCCAAGATTGTTAACCCCGCCAAAAAGGTCATCCTCCCCGATATGGAAGCGGGCTGCAGTCTGGCCGACAGCTGTCCGGCCGAACAACTGGCCGCCTATAAAGAAGCCAATCCTGACACCTACGTCGTTGCGTATATCAAT…
Crocosphaera watsonii WH 8501	WP_007304059.1	pNadA17	ATGTTTACCACTGTACGCCCCACAAGACCACAACCGGCGATTGCACTGCCGAAGGACCTGTTTTGCGCAATTGATGAGCTGAAGCGCGAGCTGAAAGCAGTTGTGCTTGCGCATTATTATCAAGATCCTGACATTCAGGACATCGCAGACTTCATCGGCGATTCACTGGGTCTGAGTCAGCAGGCAGCAACTACTGATAAAGAAGTAATTGTTTTTGCGGGTGTGCACTTTATGGCCGAAACTGCCAAAATTTTAAACCCTGATAAATTGGTGTTACTCCCTGACTTAGAAGCTGGCTGTAGCTTGGCCGATAGTTGTCCACCGAAAGAGTTTGCGGAGTTTAAAGAACAACATCCAACGGCCATTGTCGTGAGCTATATCAACTGCACCGCCGACATT…
Desulfarculus baarsii DSM 2075	ADK83407.1	pNadA18	ATGCCCCAGATCTGTCCTAAGCTGCTGGCAGATCCGGGACCAGCGGCCGAACCTTTTGCTCGGGAGACCATCCGGCGTCTGGGTCAGGTGCGCGCCCAACTGGGCCGTCGCGCGCTGATTCTCGGTCATCACTACATGTCCGATGCCGTCATTGGCTGGGCGGACGCGGTCGGTGATTCCCTGGCATTGAGCCGTCTGGCGGCTACGCAGAAAGAGGCAGAGTTTATTGTTTTCTGTGGCGTCCACTTTATGGCGGAAACCGCAGATATTCTGGCAGGCCAAGGCCGGCGCGTTATCCTGCCTGATGGCGGAGCGGGCTGTCCCATGGCCGATATGGCGGCGCCAGAACAGGTGGAGCAATGTTGGCAGGAATTGGCCCGCCTTGGTCATGGGCCAATT…
Desulfitobacterium hafniense DCB-2	ACL18980.1	pNadA19	ATGTACACGATGCAGCAACCGCTGCCCGCCGAATATCTTTCTCTGTCAGAGGAGGAAATGGATCGTCGCATTCGTAAAGTGAAAGAAGATTTGGGCTCGCGTTTGTTGATCCTAGGACACCATTATCAGCGTGATGAAGTGGTGAGATATGCGGACTACCGCGGCGATTCGCTGCGCCTCAGTCAGTTAGCGGCCCAGGCTGAAGCTGAGTACATCGTTTTTTGCGGAGTGCACTTCATGGCAGAAACGGCGGATATCCTGACCGTGCCGGAACAAAAAGTCATTCTGCCGGATCTAGGTGCCGGTTGCCCAATGGCTGACATGGCTGATATTGAAGATGTGGAACGCTGCTGGGAACAACTTGTCGCGCAATACGACGAAGAATTTGTCCCTGTCACG…
Desulfovibrio vulgaris str. hildenborough	AAS96285.1	pNadA20	ATGACCTTACACCGTCCGACGCCCGCAAGTTCGGGCGAAACACCCCAGGACGTAGCACGTCGTATTGACGCGCTGCGTGGGCAGCTGGGCGACGACGTTCTCGTTATGGGTCATCACTACCAACATGACAGCGTGATTCGCCACACCGATCTGCGTGGCGATTCCTTGGAGCTTGCGCGCAAAGTCGACGCAATCTCCGCTAAACATATTGTGTTCTGCGGTGTCTACTTCATGGCTGAGAGCGCAGCGCTGCTGGCCCGCGACGGTCAATCTGTACACATTCCAGAGTCGGATGCTAACTGCGTCATGTCTCAAATGGCACCGGCCCAACGTGTCGACGCGGTCCTGCGCAACCTGTCCGGAACGGGGCGCAACGTGATTCCTCTGGCCTACGTGAAT…
Desulfurispirillum indicum S5	ADU65000.1	pNadA21	ATGACCATGTCCATCCAGGAAAAGCAGCAACGTGTGCGTGAGCTTTTGAAGGAGCGCAACGCTGTTCTTCTTGCTCATTACTACCAGCGCGACGAGGTGCAAGCCATTGCCGATTTTGCGGGAGACTCACTTGGTTTGTCAATTGAAGCAACTCGTACTGACGCGCCTGTAATTGTGTTTGCGGGTGTCCACTTTATGGCCGAGTCTGTATATATTCTGAGCCCAGAGAAGACTGTTATTTTACCAGCGATCCAAGCAGGCTGTCCCATGGCGGATATGATTACAAAGGAAAAGCTGCTTGCTCTCCGTGATGAGTACCCGGGCTATACTGTTGTTTGCTATGTCAACTCGTCTGCCGAAGTAAAGGCGTACAGCGACATCTGCTGTACAAGTGGAAAC…
Dictyoglomus thermophilum H-6-12	ACI18692.1	pNadA22	ATGACCATTCAGGAGAAGATTCAGAAATTAAAGCGCGAGAAGAACGCTATCATCCTCGCCCATAATTACCAGTTACCAGAGGTCCAGGACATCGCTGACTTCGTAGGTGACTCACTTGAATTGGCGCGCATTTCGGCCCAAGTTAAAGAGGAAGTTATCATTTTCTGCGGGGTTCATTTTATGGCTGAAACCGCCAGTATTCTCGCTCCCAACAAGAAGGTTATTCTTCCTGACCTGTTTGCCGGTTGCCCGCTGGCGAATACCATTACCCCGGAAGACGTGAAGTCATTAAAAGAGAAGTATAAGAACTACGCAATCGTAGCATATGTGAACACGTCTGCTAAGGTAAAAGCAGAGTCCGACTATATTTGCACGAGTGCCAATGCCATCTCGGTCGTC…
Escherichia coli str. K-12 substr. MG1655	AAC73837.1	pNadA23	ATGAGCGTAATGTTTGATCCAGACACGGCGATTTATCCTTTCCCCCCGAAGCCGACGCCGTTAAGCATTGATGAAAAAGCGTATTACCGCGAGAAGATAAAACGTCTGCTAAAAGAACGTAATGCGGTGATGGTTGCCCACTACTATACCGATCCCGAAATTCAACAACTGGCAGAAGAAACCGGTGGCTGTATTTCTGATTCTCTGGAAATGGCGCGCTTCGGTGCAAAGCATCCCGCTTCTACTTTGTTAGTCGCTGGGGTGAGATTTATGGGAGAAACCGCCAAAATTCTCAGTCCGGAAAAAACAATTCTGATGCCGACACTTCAGGCTGAATGTTCACTGGATCTCGGCTGCCCTGTTGAAGAATTTAACGCATTTTGCGATGCCCATCCCGAT…
Gemmata obscuriglobus	WP_010044270.1	pNadA24	ATGAGCGTTGTTTCTCCGGCAGAACCGCGTGGCTTAGCCCCCGCTGGTTCCGGCCCGACCAGTGTCAGCCTGCTTGACGACGTGTCAGCGGAAATCCTCGAACTGAAGAAAAAACTGGGGGCCACTATCCTGGCGCATTACTATCAGGAAGGGGAGATTCAGGCGTTAGCCGATATTACTGGTGATAGCCTGAAACTGGCGCGCGAAGCCACCAAAGTTGATTCACCTGTCATTGTGTTTTGCGGCGTTCTGTTTATGGCTGAGACCGCGAAGATGCTGAACCCCACGAAACGTGTGCTGCTGCCCGATCTTAGAGCAGGTTGCTCGTTGGTGGATGCCTGCCCCGCCGACAAGTTGGAACGCTATCAAGAACGACTGCGCGAGAATGGGCGCAAATTT…
Haloferax volcanii DS2	ADE02976.1	pNadA25	ATGGTGGAGTTGCAGAGTGTTGGCTTTGAGTCCGAATTGTCGCTTTTCAAATACGACACCCTGGAACAGCTGCCGGAAAGTCATCGCGATCTGGATGAAGCGGCCCGCTCTCGCCGTATTGCGGCCGCGCGTGAGGCGCTGGGGGATCGGGTTATTGTATTAGGGCACAACTATCAGCGCCGCGAAATTGTGGAGCATGCGGATTTTGTGGGAGATAGCTATGAGCTGTCGAAACGCGCAGCGGAATCGGATGCGGATTACGTGGTCTTTGCAGGCGTAACCTTTATGGCAGAATCTGCGGACATCATTACCGATGATGATCAGACGGTCATTCTCCCGTCAATGGAAGCTAGTTGCCCGATGGCAGGGATGGCGGAAGCAGTGCAGGTTGACTCTGCG…
Haloterrigena turkmenica DSM 5511	ADB59428.1	pNadA26	ATGGTTAAGATGGAGACAGCTGAACTGGAGACGGACTTAAGTCTGTTCAAGTATGACAACTTGGAGCAATTGCCGCCCCGTTACCGTGACTTAGAGGAAGACGAGCGTACTGAACGTATCGAGGCTGCGTTAGAAGCCCTCGGGGATGACGTGGTTATTCTTGGCCACAACTACCAACGCCGTGAGATCGTTGAGCATGCAGATTTTATTGGTGACAGTTACCAACTGAGCAAGGAAGCCGCAAACGCTGACGCCGAGTACGTAATCTTTGGTGGGGTAACATTCATGGCAGAGAGCGCAGACATTATCACAGACGACGAACAGACTGTAATTCTTCCATCCATGGAAGCTTCTTGTCCTATGGCGGGCATGGCGGAAGCCCTGCAAGTGGATTCTGCC…
Heliobacterium modesticaldum Ice1	ABZ83886.1	pNadA27	ATGTCCGATGCAGTGGCGAAGCTGAAGAAGGAACGTAACGCCGTCATCCTCGCGCATGTTTATCAACGGCCCGAAGTCCAGGATGTAGCCGATTTCGTGGGGGATTCACTGCAGCTGGCCCAGCAGGCAGCCAAAACTGATGCCGACGTGATTGTCTTCTGTGGTGTTCATTTTATGGCTGAATCTGCCGCGATTCTTAGTCCGAACAAAATAGTCTTACTACCGGAAGAGAATGCAGGTTGCCCTATGGCTGATATGGTCACAGCAGATGCGTTACGCCGCCGCAAAGCGGAAATTCCGGGTGTGCAGGTAGTTGCTTACGTGAATACTTCAGCCGCGGTAAAAGCCGAGAGTGACATTTGCTGCACTAGTGCAAACGCGCTGAAAGTTGTCTCAGCT…
Hermiimonas arsenicoxydans	CAL61268.1	pNadA28	ATGCAAACTCAATTTATCAAGACCATTGAATTTGAACGCCCGGGAATGGAATCAGGAAGCTCCTGCGTGGCCCACGCATGGGCGCGCACACCTGCCACACCATCCCCGGAAGAAAAAATTGCCTTAAAAGACCGTATTCGCCACCTCCTTAAGGAACGCGAGGCTGTCTTAGTTGCGCATTACTATGTAGATGCGGACCTCCAGGATTTGGCCGAGGAAACTGGCGGCTGTGTGTCCGATTCTCTGGAGATGGCACGTTTCGGCCGCGATCATCCTGCCAAAACTCTGGTTGTTGCCGGCGTGAAGTTCATGGGGGAGACCGCCAAGATTCTGAGCCCAGAAAAGACTATCCTCATGCCGGACCTCGACGCGACCTGCTCGCTGGACCTGGGCTGCCCC…
Leptospira interrogans serovar Lai str. 56601	AAN47817.2	pNadA29	ATGAAAACATTAGAGGAAGTCGCGAAGGCGTTGAAAAATACCTACATGGAGCATGAAGTGGACGAGAAACTGCCACTGATTCAGGAAATCCAGCGTTTGAAGAAAGAAAAAAACGCAATTCTGCTTGGCCATAATTATATGACCCCGGATGTCTTTCACGGCGTTTCCGATATCACTGGTGATAGCCTGTATCTGTCCAAGGTCGCGGCCGATACCGACGCGGATGTTATTTTGTTTAACGGTGTGCATTTCATGGCCGAAACAGCCAAATTAATGTCGCCGCAAAAAAAAGTTCTCATTGCAGATCTTAAAGCCGGCTGTTCCCTGGCGGAATCGATTACGCGTCAGGATGTGATCGATCTGAAACAGAAATACCCAGGAGTGCCAGTGGTGACCTAC…
Methanopyrus kandleri AV19	AAM01290.1	pNadA30	ATGGAGACCTTTGTTTTGGCTCATAACTATCAGCGTCCAGATGTGCAATTGATGGCAGATAGCGTGGGCGATAGCCTGGAACTGGCACTGGAAGCGCGCGAAATCGATGCTGACCGTATTGTGATGTGCGGCGTTGATTTTATGGCGGAGGTTGTCAAAGCACTGAACCCAGATCGCGAAGTCGTAGTGCCAGATCATCGGGCGGCGTGCGGCATGGCGATGCGTTTACGCGCTAAAGAATTACGCGAATTTCGTCGCGAACATCCGGATGCCGCAGTTGTTGTTTATGTAAACACCAGCGCGGAGGTGAAGGCCGAAGCCGATGTGATGTGCACGTCCGCGAACGCAGTTGAAGTCGTGTCGAGCCTTCCGGAAGACAAGATTATTTTTGTGCCCGAT…
Methylobacillus flagellatus KT	ABE50646.1	pNadA31	ATGCAGGCAACCTTGGAAACAACCGAGCGACCGGCGAACACCTTGACTGCAGCCCCCATTAAATTCGAACGGTTTCAGGCGGCCCAGGAAGCTGAATTACAAGCGCGTATCATCGCTGCGAAAAAGAAGCTGGGGAACCGTCTGGTGATCCTGGGACACCATTATCAGCAAGAGAGTGTATATAGACATGCGGACTATACCGGCGATTCGCTTAAGCTCTCACGCTTTGCCGCTGAAACAGACGCAGAATATATCGTATTCCTGGGTGTGCACTTTATGGCTGAGGTAGCAGACATTTTAAGTCGCCCTGAGCAAATCTCTATCTTGCCCGACCTATCAGCTGGCTGCAGCATGGCGGATATGGCCAACCTGGCAAAAGTTGAGCGTTCGCGTCGAGAG…
Mycolicibacterium smegmatis str. MC2 155	ABK69796.1	pNadA32	ATGACCGTCCTGAACGGTACCCCGGCTGGCGCACTCGCCGATCGTATCGTTGATGGCCCTGGGGGTTACAGCGGGATTGACGGGGATGAGCAGTGGGCAGCGGAGGTGCGGAGATTAGTCGAGCTGCGCGGTGCGACGTTGCTGGCGCACAATTACCAACTGCCAGCCATCCAAGACGTCGCCGATCACGTTGGTGATTCCTTAGCGCTGAGCCGCATTGCGGCGGAGGCACCCGAAGACACCATCGTCTTTTGCGGCGTTCACTTTATGGCCGAAACCGCTAAAATCCTTTCTCCAGATAAGACCGTCCTGATCCCGGATCAGCGCGCGGGATGTTCCCTGGCTGATAGTATTACGGCAGAAGAACTGCAGGCTTGGAAAGATGATCACCCGGGCGCC…
Nitrospina gracilis	CCQ89850.1	pNadA33	ATGATCACCCTGGATGAACTGTATGAGAAGCTGAAACCGATTCGCGTCGGTAACCCGATTTGCGAATTTACCCGCGAACACTGTGAACGTATCTGGCCTACAATTGAACGCATTCGTGAACTGAAAAAAGAGAAAAACGCCATAATCCTGGCCCATAATTATGTGGAACCGGAGGTCCTGTATGGTGTAGCCGATTATTCCGGTGACTCATACGGCTTGAGCAAAAAAGCGAAGGCTTCCGATGCCGATGTTATCGTCTTCGCTGCCGTCCGCTTTATGGTGGAAACGGCCAAAATCCTGAACCCGGAGAAAACGGTTCTGGACCCAAACCCGAATGGGGGTTGTAGCTTAGCCGACGGTATTATGCCAGCGGATGTTAAAAAATTACGTAAACAGTAT…
Novosphingobium stygium	SCY25206.1	pNadA34	ATGACTGTACAGCCGGCCAACCTGTCTGGTCTGGACCTTCGCGCCGAAATCGACCGTCTGCGAAAGGAACGCAAAGCGGTCATCCTCGCCCACTATTATCAACGTCCTGAGATTCAGGACTTGGCGGACTTTGTCGGTGATTCGCTGGAACTGTCGCGTAAAGCGGCAGCAACGGATGCCGAGGTGATTGCATTCTGCGGCGTGAAATTTATGGCCGATACAGCAAAAATCCTGTCGCCAGAAAAAATCGTTGTTTTGCCGGACTTGGACGCAGGGTGCAGCCTTGAAGATAGCTGCCCGCCAGATAAATTTAAAGCCTTTCGTGAGGCCCATCCGGATCACATCGCTCTTACGTACATAAACTGCAGTACAGAAGTGAAAGCGCTTTCAGATGTCATC…
Pirellula staleyi DSM 6068	ADB17048.1	pNadA35	ATGTCGTTGGTGATAGCGCCGCGCTCTACGGCGGCCGTCCTCCCGTACAAATCTTTATCGAACGAAGAACTGAGCTCGCGGATTGAGGCTGTTCGCAAACAGCTGGGCTCGCGCCTGATGATACTGGGCCATCACTATCAACAGGACGAGGTTATTAAGCATAGTGACCTGCGCGGTGATTCTTACCAGCTCTCGCAGATGGCCGCCGCATCTAGCGATTGCCGCTATATTGTGTTTTGTGGAGTCCACTTCATGGCGGAAACCGCGGACATACTGGCGAACCGTCCGGAGAAGCTGGAGGCGCGCGGGGGTGAACGTGTGACGGTTGTTCTGCCCGACATGGCCGCCGGCTGCAGCATGGCTGATATGGCTGCGATCGAACAAGTGGAAAATGCGTGG…
Rubrobacter xylanophilus DSM 9941	ABG03084.1	pNadA36	ATGCGAGCGGCGGGTGCGGTGGTTTCGGCAGTCGAGGGTTTAGATTTATTTGAAGAAATCGATCGTCTGCGCGAGGAATTGGGCGCGGTTATTCTGGCGCACTACTACCAGGAACCGGAAATCCAGGATATTGCGGATTTCATCGGAGATAGCCTGCAGCTGGCTCGTCAGGCGCAACGTACAGATGCGCGCGTTATCGTGTTTTGCGGCGTACACTTCATGGCAGAAACCGCAAAAATCCTGAACCCGGAAAAAACCGTGGTGCTGCCGGATCTTGAAGCGGGTTGCTCCTTAGCAGATTCGTGCCCACCGGAGCGTTTCGCGGCTTTTCTTGAAGAACACCCGGGTCACGCGGTTGTGAGTTATGTGAATACCTCTGCGGCGGTGAAAGCGTTGTCG…
Ruminiclostridium cellulolyticum H10	ACL77768.1	pNadA37	ATGGATAAAGATCTCCTGATTTCTAACATTAAAAAAATGAAAAAGGAACAGAACGCCGTGATTGTAGCGCATTCCTATCAGGTCGATGAAGTTCAAGAAATCGCCGACGTCACCGGTGATAGCCTGGCCCTGTCACAGTTCTGTGCGAGTTCCCAAGCAGACACGATTGTATTTTGTGGTGTCCATTTCATGGCGGAATCAGCCAAGTTGCTGTCGCCTGAAAAAACCGTCCTTTTGCCGGAAATCAATGCGGGCTGTCCGATGGCAGACATGGTCACTGCCGAAGCGTTAAAAGAAGCGAAAAAAAAGTATCCGCACGCCGCGGTGGTCTGCTATATCAACAGCTCGGCGGAGGTTAAGGCAGAATGCGACATTTGTTGCACCTCGTCTAACGCTGAA…
Salinisphaera sp. LB1	AWN14904.1	pNadA38	ATGACGACGCAGAACGAACAACTTGTTGCCGACATCCAGCGTCTCAAGGCTGCAAAGAATGCGGTGATCTTAGCACACAATTACGAGCGTCCAGAGATCCAAGACATTTGTGACTATCTTGGTGATTCTCTGGGACTGTCACGCCAAGCGGCGGCAACAGACGCTGAAGTCATCGTGTTTTGTGGTGTTCACTTTATGGCCGAGACGGCGAGCATTATCAGTCCAGACAAGACCGTACTTATTCCAGACCTGAACGCGGGGTGTTCTCTGGCAGAGAGCATCACGTTGGAGCAATTGCAGGCGTGGAAGGCCGAGCATCCTGGTGCCACCGTGGTAGCGTACGTAAACACCAGCGCGGCAATTAAGTCGGAATGTGACTATTGCGTGACCAGCAGCAAC…
Salinivirga cyanobacteriivorans	ALO15705.1	pNadA39	ATGGACATTAACAACGAGATCAAAAAGAAAGGTTTTCTGGATATCGATTTGCCAGACAATTTGGATCTGAAAGTCGAGATCAATAAGCTGAAGGCCGAGAAGAATGCCATTATCCTGGGACATTTCTATCAGACGGATGACATTCAGGAAATCTCCGACATTTTGGGGGATAGTCTGGCGCTGGCACAAGAAGCGAGTAAAACCAAAGCAGATTTGATTGTTTTCGCGGGCGTGCACTTTATGGCGGAAACTGCAAAACTGGTGAATCCGACGAAAAAAGTTGTACTGCCAGATCTGAACGCTGGCTGCTCTTTAGCGGATTCCGCCCCAGCTGACGAATTCGAGAAATTCGTTAAAGCTCACCCTGACCATACGGTGATCACCTATATTAACTCGTCA…
Sphaerobacter thermophilus DSM 20745	ACZ38300.1	pNadA40	ATGTCTACGTTGAGCCTGGTAGATTCGCCGGTGATTGCGGGCAACGGCACCGAATCACCCTCTGATACGTCAGCGCTCGTGGCGGAAATCGACCGGCTGCGTCGGGAACGCAACGCGGTTATTCTGGCCCATAGCTATCAAATCCCGGAGATTCAAGATCTGGCGGACTTTGTCGGTGATAGCCTGGGCTTGTCTCGCCAAGCGGCAACCACAGATGCGGAAGTTATTGTATTCTGCGGGGTGCACTTTATGGCGGAAACCGCAGCGATTTTGAGCCCAGATAAAACCGTTCTGCTGCCGGATCTGGAAGCAGGCTGCAGCCTGGCGGCGTCGATCACCGCGGATCAACTCCGTGCCTGGAAAGCGGAACATCCGGGTGCCGTTGTCGTGTCTTACGTT…
Spirochaeta thermophila DSM 6578	AEJ62405.1	pNadA41	ATGACCCTGCGTGAATTAAAAGAGGATATGAAGCGCCGCATGGGAGAAATCGTACCTGAGGTGGAGATTCCGCTGAAGGCAGAATTGATCTTAGAGATCCGTGCGCTTAAGGAAGAAAAGAATGCGTTAATCCTTGGCCACAATTACATGGAACCTGCGTTGTACACCTACGTACCTGACGAACGTGGAGATTCTTTAGAACTGAGTCGCAAGGCTGCGGGAACCGACAAGCCGATTATCGTCTTTTGCGGTGTAAAGTTCATGGCGGAAACTGCTAAGATTCTTAACCCGAGCAAGAAGGTGTTAATCCCTTCGCTCGAGGCGGGATGTTCTTTAGCAGAGTCTATTACTGCAGAGGACGTCCGCGCCATCCGCGCTCTTCTTCCTGGCGTTCCCATC…
Streptomyces cattleya NRRL 8057 = DSM 46488	AEW93658.1	pNadA42	ATGACCACCACCGAACCGCTGGACGTTCAGCCGACCCCGCTGGCTCTGCTGCTGCTGGGTCGTGAAGCTGACCCGCGTTCTGAACGTGGTGTTGAATGCCCGGGTGACCTGCCGGCTCCGTCTGACCCGGACCTGGTTGAACGTGCTCGTAAAGCTAAAGCTTCTCTGGGTGACCGTGTTTTCGTTCTGGGTCACCACTACCAGCGTGACGAAGTTATCGAATTTGCTGACGTTACCGGTGACTCTTTCAAACTGGCTCGTGACGCTGCTGCTCGTCCGCAGGCTGAATACATCGTTTTCTGCGGTGTTCACTTCATGGCTGAATCTGCTGACATCCTGACCTCTGACGACCAGCGTGTTATCCTGCCGGACCTGGCTGCTGGTTGCTCTATGGCTGAC…
Synechocystis sp. PCC 6803	BAA18685.1	pNadA43	ATGTTCACGGCTGTTGCCCCACCTCAGGAGACCTTACCTCGTGACCTGGTTGGTGCAATTCAGTCACTGAAGAAAGAACTTAACGCTGTCATCCTCGCACATTACTACCAAGAGGCCGCGATTCAGGACATTGCAGACTATCTTGGTGACAGCTTGGGTTTATCGCAACAAGCGGCGAGTACGGACGCGGACGTGATTGTCTTTGCTGGTGTGCACTTCATGGCTGAAACCGCTAAGATTCTCAATCCCCACAAATTGGTCCTGCTTCCGGATCTGGAAGCGGGCTGCTCATTGGCGGACTCCTGTCCGCCACGTGAGTTTGCTGAGTTTAAGCAACGTCACCCCGATCACCTCGTTATCAGCTATATCAACTGCACCGCAGAAATTAAAGCCCTTAGT…
Syntrophobacter fumaroxidans MPOB	ABK17287.1	pNadA44	ATGAATGTCTCAAAGGACACCATCCGTCGTATCCAGGAATTAAAGCAAGAGAAGAAGGCGATCATCTTGGCCCACAATTATCAACCACCTGCGATTCAAGACGTGGCGGATCTGACCGGGGACTCACTGGAACTGAGCCGTCACGCTTCGGCAACAGAGGCCGCTGTTATCGTGTTCTGTGGCGTTGGTTTCATGGCGGAGACCGCAGCAATCCTTAATCCTGGTAAGATCGTCCTGCTTCCGAATCCGCGCGCCGGCTGCCCGATGGCAGACATGATTACCCCAGGAAATGTGAAGGACATCCGTCGCCAATACCCGGGTGTGCCAATTATTACGTACGTGAACTCCACTGCGGCTGTCAAAGCGGAGTCCACAGTGTGCTGTACAAGCTCAAATTGT…
Thermanaerovibrio acidaminovorans DSM 6589	ACZ19971.1	pNadA45	ATGGATATTAACCACCTTAAGGAACGTATTTTGAGCCTGAAAGAGGCGAAGGGAGCCGTCATTCTGGCGCATAATTACCAGCCGCCGGAGGTTCAAGATCTGGCGGACCTTGTGGGGGATTCATTTCAATTATCTCGTGCAGCGAGCCGTATGGAAGCCGAAACTATTGTCTTCTGCGGTGTCCGCTTCATGGCCGAATCTGCAAAGATCCTGTCGCCTCAAAAAAAAGTGCTCTTGCCTGCGCCGGACGCGGGCTGTCCTATGGCTGATATGGTAACCCCGGAAGACCTGCGTGAAATGAAACGTAAACATCCCGGAGCCCCCGTCGTGTGTTACGTGAATACGAGTGCAGAGGCCAAAGGGGAATGTGATATTTGCTGCACATCCAGTAATGCGCCC…
Thermogemmatispora tikiterensis	RAQ94418.1	pNadA46	ATGGCTCTGCAGACCGCGTGTGAAGCCTCACAGGAATCGCGTATTCTGCCTCTGTTGCATCCAGCAACCCGCGATCAGTACGCTCATGGAGGTCGCGCCGATCATATCCCACGCCGCTATGCCGAGATGGATGGCGCCGAGCTGGACCGCCGTATCTCTCAGGCTAAAGCAGCCCTGGGCCGCCGGCTGCTGATCTTAGGCCACCACTACCAGCGCGACGAAATTATCAAATATGCTGATCTCCGCGGCGACAGCTTCAAACTTGCCCAACAGGCCGCCGCACGCCCGGAAGCTGATTACATCGTGTTTTGCGGTGTACATTTTATGGCTGAATCTGCGGATATTTTAAGCGCGCCGCACCAGCAGGTGATCTTGCCAAATCCTACCGCCGGTTGCAGC…
Thermotoga maritima MSB8	AAD36711.1	pNadA47	ATGGTTGACGAGATCCTCAAGTTAAAGAAGGAGAAAGGGTACATTATTCTGGCGCACAACTATCAAATCCCTGAGCTGCAAGACATTGCAGATTTTGTGGGTGACTCACTTCAATTGGCGCGCAAGGCAATGGAGCTCTCAGAAAAGAAGATTCTGTTTCTGGGAGTGGACTTCATGGCCGAGCTCGTGAAGATCCTGAATCCTGACAAGAAGGTTATCGTCCCAGACCGCAGCGCTACCTGTCCAATGGCCAATCGTTTAACGCCCGAGATCATCCGCGAATACCGTGAAAAGTTCCCTGACGCGCCAGTAGTCTTATATGTGAACTCCACGTCAGAGTGCAAGACGTTAGCGGACGTGATTTGTACAAGCGCAAATGCGGTAGAGGTGGTAAAGAAG…
Thermus thermophilus HB27	AAS80968.1	pNadA48	ATGGGCCGGATGCGTGGCGAAGCGCTGGCGCAGGAAGTGCTGCGACTGAAACGTGAACGCAACGCGGTTATCCTCGCCCACTCGTATCAGCTCCCTGAAGTGCAGGAAGTGGCCGATTTCGTTGGTGACTCGCTGGGACTGGCTCGGGAGGCTCAGCGTACCCGTGCCGAAGTGATCGTGTTTTGTGGCGTTCATTTTATGGCGGAAACGGCAGCAATCTTGAATCCGGAGAAAACTGTTTTGTTACCCGACTTGGAAGCGGGCTGCTCGTTGGCGGACTCGATTCGTCCGGAAGATGTACTGGCGTGGAAAGCGAAACATCCGGACGGCATTGTGGTGGCGTATGTAAATACAAAAGCCGAAGTTAAGGCGCTGGCAGATGTTTGCGTAACCAGCGCC…
IspG orthologs
Organism Name	NCBI ID	Plasmid	Nucleotide sequence
Acidimicrobium ferrooxidans DSM 10331	ACU53587.1	pIspG01	ATGGCACGCCCTCAGATTGCGCTTGCGCCTCGCCGCCCGACTCGCCAAGTAATGGTCGGAAGCGTCCCGGTAGGTGGCGGCGCCCCTATTTCCGTTCAGTCTATGACCACCACCCAGACTGCCGATGTTGAGGGGACCTTAACCCAGATTTATGCACTGGCCGCGGCCGGCGCCGATATTGTACGTGTGACATGTAACACCCGCGATGCTGCGGATGGTTTGGCGCGTATTGTACCACGCTCTCCGGTCCCGATTGTTGCGGACATCCACTTTCACGTGGAAATGGCGCTCGCGGCTTTGGATGCAGGAGTTGCGGCACTCCGTCTGAACCCCGGTAACTTACGTAAACGTGAGGAGATTCAGTTGGTAGCGCGCGAGGCAAAAGACCGTGCAATTCCC…
Aeromonas hydrophila	ABK39186.1	pIspG02	ATGAGTGCGCATGAATCACCGATCATCCGCCGGAAAAGCCGTCAGATAATGGTGGGTAACGTCCCTGTGGGGGGTGATGCCCCGATCACAGTACAGACTATGACGAATACCAAAACGACGGATGTTGCAGCGACCGTGGAACAGATCCAACGTATCGAACGCGTCGGCGCAGATATCGTTCGCGTCTCGGTGCCTACAATGGAAGCGGCCGAGGCATTTAAATTGATTAAACAGCAGACGCGTATTCCGATCGTTGCAGACATCCATTTCGATTACCGTATAGCCCTCAAGGTAGCGGAATATGGGGCCGATTGTTTGCGCATTAACCCGGGTAATATCGGCAACGAAGAACGTGTGCGTGCAGTTGTAGACTGTGCTCGCCACTACAATATTCCTATT…
Allochromatium vinosum	ADC62931.1	pIspG03	ATGTCGCAGACCAACACTCCGCAGCGTCGTCAAACACTACCTGTGACCGTTGGGAGCGTAACCATTGGCGGCGGCGCGCCGATTGTCGTGCAATCGATGACCAATACGGACACTGCTGATATTGATGCCACCGTTCGCCAGGTCGCCGAACTCGCGCGAGCGGGTTCCGAAATGGTCCGGCTGACTGTTAATCATGAATCCGCCGCACGTGCCGTCCCGGCAATTCGTGAAGCGCTCGAAGCCCAGGGGTGTCACGTGCCGTTAGTTGGCGATTTTCATTTCAACGGCCACCGTCTGCTCACCGATTATCCTGAGTGTGCGCTGGCGCTGGCGAAGTACCGCATTAATCCGGGCAACGTAGGTAAAGGCGAGAAAAAAGACTCACAGTTCGCTACCATG…
Anaplasma phagocytophilum str. CRT38	EOA62006.1	pIspG04	ATGCGCGTTAGCCAGGCTGTACGTGTCGGTAAGGTTACAATCGGGGGTGGCCACCCTGTTGTAGTGCAGTCTATGGCTCTGGGTGGCTCCGGTAGTTTCGATAGAGATATGCAGGAAGTGCTGGCGCTGGCCCGCGAGGGCAGTGAATTGGTGAGAGTGGCGATCAACAGCGATGAAAGTATTAAAGTCATCCCAGATATGGTTGATGTTCTGGTTAAACATGGCTTCGACGAGAAAATGATCGTAGGTTGCGGTCAATATGAAGTAGCGCGGCTGCTCAGAGATTATCCAACCTGCGCGGCGGCCCTGGGTAAGATCCGCATCAATCCCGGTAATATCGGTTTCGGCGACAAACGGGACAAGAACTTCGAAGAAGTAATTGAGTTTGCAATCAAACAC…
Aquifex aeolicus VF5	AAC07467.1	pIspG05	ATGATTCAGAAACGCAAAACCCGCCAGATTCGGGTCGGTAACGTTAAAATCGGCGGTGATGCCCCGATCGTTGTGCAGAGCATGACAAGCACCAAGACCCACGACGTGGAAGCGACTTTAAATCAGATCAAACGGCTGTACGAAGCTGGTTGCGAAATCGTCCGGGTTGCCGTACCGCATAAAGAAGATGTCGAGGCGCTTGAAGAAATCGTCAAAAAAAGTCCTATGCCAGTAATCGCCGATATTCACTTCGCCCCTTCATATGCCTTCCTGTCGATGGAAAAAGGTGTCCACGGCATCCGTATTAATCCGGGAAATATTGGCAAAGAAGAGATTGTACGCGAAATTGTGGAAGAAGCAAAACGTCGTGGTGTAGCCGTTCGCATTGGTGTAAACTCT…
Azoarcus sp. BH72	CAL93544.1	pIspG06	ATGGTTGAGCAGGCGTTTCCATTCGGCTCCTTGCCGCGTCGTCCAACGCGCCAGGTCCGCATTGGGGGTGTGAGCGTTGGGAGCGCCGCACCGGTAGTGGTACAGTCGATGACTAACACGGATACTGCGGACGTCCTTGGCACGGCCATGCAGGTGGCGGAACTGGCCCGCGCAGGGAGTGAACTCGTGCGCATCACCGTGAACAATGAGGCAGCGGCCAAAGCGGTACCCCATATCCGCGACCGTTTGCTTGCCCTGAACATGGATGTGCCGCTGGTTGGCGATTTTCACTATAATGGTCACAAACTCCTGATGGACAACCCGGCCTGTGCGGAAGCGTTAGCCAAACTGCGCATCAACCCGGGGAACGTCGGCGCAGGAGCGAAGCGTGATCCGCAA…
Bacillus subtilis subsp. subtilis str. 168	CAB14437.1	pIspG07	ATGCAAGTTTCTGAAATCACTCATCGCACCAAAACTCGTCCGGTGAAGGTCGGCCCGTTGACAATTGGTGGCAATAATGAAGTTGTCATTCAGAGCATGACGACCACCAAAACGCATGACGTGGAAGCGACCGTCGCAGAAATCAATCGCCTGGCCGAGGCCGGTTGCCAGATTGTGCGTGTGGCCTGCCCGGATGAACGTGCCGCAAATGCCATCGCCGACATTAAAAAACGTATCTCGATTCCGCTGGTAGTGGATATCCACTTTGATTACAAACTGGCGCTGAAAGCCATTGAGGGTGGCGCGGACAAAATTCGTATTAATCCGGGTAATATCGGTCGTCGCGAAAAAGTTGAAGCTGTGGTAAAAGCGGCGAAGGATAAAGGCATCCCAATTCGT…
Blastopirellula marina DSM 3645	EAQ77076.1	pIspG08	ATGCAAATACAGCGCAATTCTACGCGCCGGGTGGTGATTGGCTCGATCGCCATTGGAGACGGGAATCCGATCGCGGTGCAAAGTATGACCGCAACAAAAACGCAGGATATTGACGCCACCGTGGGTCAGGTCCGTGCCCTGGAAGAAGCAGGCGCTGATGTAGTGCGCATCGCAGTCGATAATAAGAAAGATGCAGAAGCGCTCGCCGAGATTCGTCGTCAGACAAGCGCCAACCTGTCGGTAGACCTGCAAGAAAACTACCGCCTGGCAGAACTCGTGGCCCCACACGTCGATAAAGTGCGTTATAATCCTGGTCATCTGTACCATCACGAGCGTACTAAACCGTGGCGTGAAAAAGTTAACTATCTTGTGGGTGTTGCGCAGGATAATGACTGTGCA…
Candidatus Caenarcanum bioreactoricola	MOYB01000001.1_3	pIspG09	ATGCGCTTTTCGAAACAGATCCAAATCGGCAACATTAAGATTGGCGCAAATGCACCTGTCAGCATTCAGTCAATGTGTAATACTAAGACCGAAAACATCGATGAAACTTTGAAGCAAATCAATGCGCTGTGCCTTGCGGGCTGTGAGCTCGTTCGCCTTGCGATCCCCAATCAAAAGGCGGTAGATGCGCTTAAAATCATCCTGCGTGATTCACCGTTACCAATTATCGCGGACATTCATTTTGACTGGCAGCTTGCGTTGGGCGCCATTTCAGCAGGGGTGCATGCCATTCGCCTGAATCCAGCGAACCTTAACAACAAGGAGAAAATTATTGAAATCGTTAGTGCGCTCAAAGAACGCAAAATCCCTCTTCGTATCGGCGTCAATAAAGGTAGCCAG…
Candidatus Fermentibacter daniensis	KZD16972.1	pIspG10	ATGCGCATCCGTCGTCGTCGCTGCCGCAGTGTCACGGTTGGGAGTGTCCGTATCGGTGGCCGTGCGCCAATTAGTGTTCAAAGCATGACCAACACCCCGACCGCCGATGCAGGCGCAACCATCGCGCAAATCCGTTCCCTGGTTGAGGCCGGCGCCCAAATTGTGCGTGTGAGTGTACCGGACGAAGCAAGCGCAGCCGCGCTCCATCGTATTGTGGCCGAATCTGGTGTACCGATCGTGGCAGATATCCATTTCCGTCATGATCTGGCGGTAGCAGCAGTGGAAGCCGGGGTTGCCAAATTACGCATTAATCCGGGTAATATTCAACGCCCGGCGGACGTACGCGTTCTGGCGGAGAAAGCGGCATCCCGTGGTATTCCTATCCGCGTTGGGATTAAT…
Candidatus Gastranaerophilales bacterium HUM	DAA93923.1	pIspG11	ATGATTAAACGCCGTAAAAGCAAGGAGATCAGCATCGGAAACGTGAAGATTGGCAATAACAATCCTATCTCAGTTCAATCGATGTGTAATACTGATACCCGTAACATCGAGCAAACATCGCGCCAAATCAAGGAATTGGCCGACGCAGGTTGTGAATTGGTGCGTCTTGCCGTTTTGAATAAGGACGCAGCAGAAGCGATCAAGCGTCTGGTTAAGATCAGCCCTGTGCCACTTATTGCTGACATCCATTTCGACTATCGTTTAGCGATTCAGTGTATTAATAATGGCATTTCCGCGTTGCGCCTGAATCCAGGTAACATCGGGAAGCGCGAAAATGTCGAGAAGGTGGTTAATCTGGCCAAGCAACAGAATATCCCTATCCGCATCGGCGTGAACGCT…
Candidatus Koribacter versatilis Ellin345	ABF40425.1	pIspG12	ATGCCGACTATTTATCGCCGCAAAACCCCGGTGGTACGCATCGGAGATGTTTGGGTGGGCTCAGATGCCCCGGTAGTGGTGCAGTCCATGACCAATACGGACACTGCTGACGTCGACTCAACAATTAAACAGTGTATCGCGCTGGCGCGTGCTGGCAGCGAACTGATTCGCGTTACCGTTAACAATGATGACGCCGCGAAGGGGGTGCCTCACCTGGTGGACGGGTTAGCAAAAATCGGCATTCATACCCCGATCATTGGCGATTTTCATTATAACGGCCACATTCTGCTGAAGAAGTACCCGGACTGTGCCAAAGCGCTGGCCAAATATCGTATCAACCCAGGAAACGTGTCAATTGGACGCAAAGATGATGATAACTTTAAGGCGATGGTCGACGTA…
Candidatus Sumerlaea chitinovorans	AXA34785.1	pIspG13	ATGAACTCCACGCCTCGCTACCTTCGCCCTCGCCGTCGTACCCGCGAGGTGGCGGTCGGACAATTCGTGATCGGTGGCGCCAACCCTATCCGTGTGCAGAGTATGACATCAACCGAAACGAGTGATATTGAAGCCACCGTCGCGCAAATCCGTGCATTGTGGGAAGCGGGTTGTGAAATCGTTCGTTTGACCGTTAATACGCGCAAGGCCGCTGCCGCCTTACCCGAGATTCGCAAACGTTGCGCTGGCATCCCGCTCGTAGCCGACATTCACTACAATCATCATCTGGCATTAGAGGCCGCGCCATATGTAGACAAGATCCGTATCAACCCAGGTAATATTGGTTCTGAAGAAAACGTCCGTGCTGTGATTCAACGTGCGAACCAATTTGGTCTGCCA…
Cellvibrio japonicus Ueda107	ACE82628.1	pIspG14	ATGCACTGCGAAAGTCCGATTGTTCGCCGTAAATCCCGCCAAATCATGGTGGGCAACGTGCCGGTAGGTGGCGGGGCTCCTATTAGCGTGCAGTCTATGACAAATACCGAAACGACTGATGTCGCAGCGACGGTAGAGCAAATCCGTCGCATCCAAACGGCTGGCGCGGATATTGTGCGTGTGTCTGTCCCGACCATGGAAGCCGCAGAGGCATTTGGGCTAATCCGCAAACAAGTAAATATCCCGCTGGTTGCTGACATTCATTTCGACTACCGCATTGCCCTTCGTGTGGCAGATCTGGGTGTCGACTGTCTGCGTATTAACCCGGGTAACATCGGCCGCGAGAAACGCATTAAGGCCGTAGTGGATAAAGCTCGTGACTTAAATATCCCAATTCGC…
Chlamydia caviae GPIC	AAP05169.1	pIspG15	ATGGTGATTTCACCTAGCAAAAAGCAGGCCGCACGTCGCCATACTCATTCGGTAAAAATTGGTAATCTCTATGTGGGTTCCGAACACTCCATCAAAATGCAGAGCATGACAACGACCCCGACGGCGGATGTCGAAGCTACTGTGACGCAGATCTGTGCGCTCGTGGAGGCAAAATGCGAAATCGCACGCGTAACAGTGCAGGGTATCAAAGAAGCGCAAGCTTGCGAGCATATTAAAGAACGCCTGCTCTCTATGGGTATTGCAATCCCGTTGGTTGCCGATATTCACTTCTTTCCGCAGGCAGCAATGCACGTAGCAGACTTTGTGGATAAAGTGCGCATCAACCCGGGCAATTTTGTGGATAAGCGTAACATGTTCACCGGGAAAACGTATACGGAC…
Collinsella stercoris DSM 13279	EEA90248.1	pIspG16	ATGGCACCTTGCGCACGCGAACTTACTCGCCCGGTCGTGGTCGGCGACGTTCAAATAGGTGGCGGTGCGCCGGTGGTCGTGCAGAGCATGACCTGTACCCCAACGACGGATGTCGCTTCTACGCTGGCCCAAGTGCGCGCACTCGCCGAGGCAGGCTGCGATATTGTCCGTGTCTCAGTCCCTACGAAAGAGGCCCTGGGACCGTTCGGTGTGGTTTGTCGCGAAAGCCCCGTGCCGATCGTAGCAGATATTCATTTTGACTACCGCCTAGCTATTGGCGCCGTACAAGCAGGTGCAGCCAAACTGAGAATCAATCCGGGGAATATCGGTGATTGGGACCGCGTGGACGCAGTTATCGATGCAGCGGGGGAAGCGGGCGCCGCAATCCGTATTGGGGTG…
Coraliomargarita akajimensis DSM 45221	ADE56011.1	pIspG17	ATGACTGATCTGCAGCACACGCAATTGCATTACTGTGCCAGCCGCTTCCAAGCGCAGCGTCGCCTGAGCCGTGAAATCAACGTTGGCGGAGTGCGTGTGGGTGGCAATAACCCAATCAGAATCCAGTCCATGACCACGACAGACACGCAGGATGTCGACGCAACAGTAGCCCAAACGCTGGCCTTGGCGGAGGCTGGTTGTGAAATTGTGCGTATTACCGCACCGAATAAAAAAGCCGCAGAAGCACTGGGAGAAATCTCGAAGAAAGTACGCGCTGCAAAATGCGATGTGCCGCTGGTGGCGGATATACACTTCCTCCCGGCGGCGGCAATGGAGGCGGCCAAACACGTCGAAAAAGTGCGCATCAACCCGGGCAATTATGCAGATAAAAAAAAATTT…
Cutibacterium acnes KPA171202	AAT83253.1	pIspG18	ATGACAGTAAACTTGGGCATGCCTACCCCACCGATCCCAACCTTGGCACCCCGTCGTAAGACTCACCAGATCAAAGTTGGCGACGTTCTGGTTGGTGGTGACGCACCTATTTCTGTACAAAGTATGACGACGACTAAGACACATGATGTGGGTGCGACCTTGCAACAGATCGCCGCACTGACTGCCGCCGGCTGTGATATCGTGCGCGTCGCGTGCCCCACAGATAAGGACGCCGAGGTTCTCCCGATTATCGCAAAGCGTAGCCAAATCCCGGTTATCGCCGACATCCACTTTCAACCTAAGTACGTATTTCAAGCGATTGAGGCGGGCTGTGGTGCAGTGCGCGTAAATCCGGGGAACATTCGTAAGTTTGACGACCAAATTGAAAGTATCTGTCAA…
Desulfitobacterium hafniense DCB-2	ACL21716.1	pIspG19	ATGGAGCGCAAACTTACCAAGACGGTTCGCATAGGCGATGTTATCATTGGAGGGGGGTCCCCGATCGTAGTGCAAAGCATGACAAATACGGACACGCGTGATATCCCGGCTACTTTAGCCCAGATCCAAGCACTCGCGCGCGCCGGATGCGAAGTAGTGCGCCTGGCAGTTCTTGACCGCGAGGCGGGCTATGCACTGGGTGAAATCGCCCTCAAGTCCGAACTGCCAGTAATTGCAGATATCCACTTTGACTATCAGCTCGCGTTGCTTGCAATTGAACAGGGAGTGCATGGTCTCCGCCTGAACCCGGGCAATATCGGCGCCCGCTGGAAAGTTCAGGAAGTCGTGCGCGCATGCAAAGAGCGTGAAATTCCGATCCGCATTGGGGTGAACGCCGGC…
Egibacter sp.	PWFH01000026.1_54	pIspG20	ATGGGCACCACGCTGCCGTTAATCAATCAGCCGGCTCCGGATCCGGCCCTTCCGGCTCACCACCAACCGCCGCTGCGCCGGCCGACCCGCGCCTTGCACGTTGGTGACGTTCCTGTAGGCGGCGGGGCCCCAATTAGCGTACAGTCAATGACCACCACCCCCACGCATGATGTGAATGCGACATTGCAACAGATCGCGGCGCTGCAAGCGGCGGGCGTGGACATTGTCCGTGTCGCGGTCCCCCGCAACGAAGACGCAGACGCTCTGGCGACTATTGCTGAAAAAAGCCCGGTGCCGATTATTGCGGACATTCATTTCCAGTGGAAGTATGCGCTGGCCGCGATCGAAGCGGGGTGCGCTGGTGTCCGTATTAATCCTGGCAATATCCGTAAACATGAA…
Escherichia coli str. K-12 substr. MG1655	AAC75568.1	pIspG21	ATGCATAATCAGGCTCCAATTCAGCGCCGTAAAAGCACGCGCATTTACGTGGGGAACGTCCCGATCGGTGACGGAGCACCGATTGCCGTGCAATCCATGACCAATACACGTACAACGGATGTGGAAGCAACGGTCAATCAGATTAAAGCACTCGAACGTGTGGGCGCCGACATCGTCCGAGTGAGCGTCCCAACGATGGACGCCGCCGAAGCATTCAAACTGATTAAGCAACAGGTGAACGTCCCTCTGGTAGCAGACATCCATTTTGATTATCGTATCGCCCTGAAAGTGGCAGAGTACGGTGTCGACTGTCTCCGTATTAATCCGGGCAACATCGGGAATGAGGAGCGTATTCGGATGGTGGTGGATTGTGCGCGTGATAAAAACATTCCTATTCGC…
Fibrobacter succinogenes subsp. succinogenes S85	ACX75977.1	pIspG22	ATGCTTGATTTTACGACACTCCCGTATGTGGACGACCGTTTCAAAGCCGTTCGCCGCGAGACGGTTCAGGTACGCGTTGGTGACGCGCTGATTGGTGGAAATGCGCCTATCTTGGTACAATCGATGACTACTACCAAGCCGAAGGACGTAGAGAAGACGGTCGCAGAGACATTGGCCTTAGCAAAGGTTGGTTGTGGCCTGGTGCGTATCACGGCCCCTACTTTTGCCGATGCCGCGGGCCTCGAGGAAGTAATGAAACGCGTACGTGCCGCCGGATGTACGGTCCCTGTTTCGGCGGACATCCATTTTCAACCAAAGGCTGCATTCGAGGCGTTGAAGTGGGTTGAGAAGGTCCGCATCAACCCTGGTAATTTCGTAGATACTGGCATTTTAACTCTC…
Gloeobacter violaceus PCC 7421	BAC91563.1	pIspG23	ATGCAGACCCTGGACCCGGTTACTCCGGCACTTCTGCCTTTGCGCCGCGTCACACGCCCGGTTCAAGTAGGGGCCCTTACGATTGGTGGGAACGCGCCCGTAGTCGTTCAAAGTATGATCAATGAGGACACGCTGGACACCCCGGGCGCGGTAGCAGCGATCCGTGCGTTACACAAGGCAGGATGCGAATTAGTACGCGTCACAGTTCCATCTCTCGCCCACGCCCGCGCCTTAGAGCGCATTCGCAAGACACTCGAGGATACATACCGTCCGGTTCCCCTGGTGGCCGACGTGCATCACGATGGTGGTCCGATTGCATTAGAGGTAGCCCGCCATGTTGACAAAGTGCGCATTAACCCTGGTCTGTTTGTTTTCCGCCGCGCACGCTTAGGGGACTAT…
Helicobacter pylori J99	WP_000892444.1	pIspG24	ATGTTGGAGAATCGGGTCAAAACGAAACAAATCTTCATTGGGGGCGTGGCCATTGGCGGGGATGCGCCTATTTCAACACAATCCATGACCTTTTCAAAAACCGCGGATATTGAAAGCACTAAAAATCAAATCGATCGCTTCAAACTAGCCGGTGCTGACTTGGTTCGTGTGGCGGTGAGTAATGAAAAAGACGCCCTCGCTCTCAAAGAACTGAAAAAAGTGAGCCCACTGCCGCTGATTGCAGACATCCATTTCCATTACAAATTTGCGCTGATTGCGGCACAATCGGTCGATGCAATCCGCATCAATCCGGGGAACATCGGCTCAAAAGACAAAATTAAAGCGGTTGTTGATGCGTGCAAAGAAAAGAATATTCCAATACGTATCGGTGTGAACGCA…
Isosphaera pallida ATCC 43644	ADV63232.1	pIspG25	ATGGCGTATGCAACGACCATCCAACGCCGTAAAACACGCGTGGTGGAAGTGGGGGGTCACGGCGTAGGTGGTGATAACCCTATCTGGGTACAGTCGATGACGACCACAGACACGTTCAATGCAGCAGCCACGATCGAGCAAATCCATCGCCTGGAAGAAGCGGGGTGTGAGCTGGTGCGCGTAACGGTACCGAAGAAAGAGGATTTAGAAGCTGTGGGGTACATTAAAAGCCAGATTAAGATCCCTCTCATTGCCGACATCCATTATGATTATCGTATGGCATTGGGATGTCTGGAAGCGGTGACTCCGGATGGTAAACGCGCCATCGACAAAGTTCGTATTAACCCAGGCAATATTGGAGGAGAGGAGAGATTTAAAGAGGTGATACGAAAAGCAAAG…
Mariprofundus ferrooxydans	EAU54713.1	pIspG26	ATGTCATTGTCGCGGCCAGGCGCAAGACCCGCCAGGTCCAGGTGGGTTCTGTGGCTGTGGGGGGAGATGCACCGGTCGCCGTCCAGTCCATGACGAACACATTAACCACCGATATCGATGCCACCGTTGCCCAAATTCACCGTCTGGATGAAGCGGGTGCGGATATAGTGCGCGTTTCTGTGCCGGACCCTGATAGTGCGGCTGCGATGCCAGAAATTCTGGCTCAGACTAACGTGCCCCTGATTGCTGATATCCATTTCAGCTATAAAATGGCACTGGCGAGCCTGGAGGCCGGCGTGCATGGCCTGCGTCTGAACCCAGGCAATATTGGTAGTCGCGACCGTGTAGAACGGGTAGTGAAAGCTGCCGCTGAACGCGGGGTCTCCATACGAATAGGGG…
Methylococcus capsulatus str. bath	AAU91397.1	pIspG27	ATGATGAACCGCAAACAGACAGTTGGGGTTCGTGTTGGTAGTGTTCGCATTGGCGGCGGGGCGCCCATCGTGGTACAATCCATGACGAATACTGACACCGCAGACGTTGCAGGAACGGTCCGCCAAGTCATCGATTTAGCCCGTGCAGGTAGTGAGCTGGTCCGCATCACCGTCAATAATGAAGAGGCCGCAGAGGCAGTCCCACGTATCCGTGAGGAACTTGATCGTCAAGGGTGCAACGTTCCACTGGTTGGGGATTTCCATTTCAACGGCCACAAGTTATTGGATAAGTACCCAGCGTGCGCAGAGGCATTGGGGAAGTTTCGTATTAATCCCGGTAACGTAGGTCGCGGGAGCAAACGCGATCCACAGTTCGCCCAAATGATTGAGTTTGCCTGC…
Nitrospina gracilis	CCQ91393.1	pIspG28	ATGAGCGCCAACATTAAACCACGTACGACACGTAAGATTAAGGTTGGTACCCTCACCCTGGGTGGCGACAGTCCCATTGCGGTGCAGTCGATGACTGCGACTCGTACTCAAGACCTGCAAGCGACGGCCCGTCAAATCGAAATTTTGGAAAAGGCAGGCGCGGACATTATTCGTATTGCGGTGGACAGCAAGGAAGACGTGGAAGCGTTGAAAATTCTGCGCAAGGGCAGCAAAGCGATTTTTTCCGTAGACCTGCAGGAAAACTACCGCCTCGCGCCGATTGTCGCACCGTATGTGAACAAAATCCGTTACAACCCGGGTCATCTGTGGCACTTAGATAAGGATAAAACCATCAAGGAAAAAGTTGAATTTATCGTAAACGCAGCGCGCGAACACGAA…
Pedobacter heparinus DSM 2366	ACU05649.1	pIspG29	ATGGAAGATACCGTTTTGTATTCGCGGTTTCTGACGCGCGAGGTGGCGATCGGCGATGTTCCGATGGGCGGTTTGAATCCTATTCGCATCCAAAGCATGACCACAACTGATACTATGGATACGATTGGTACGGTGGAGCAGACCATCCGCATGGTGAACAGCGGTTGCGAGTACGTGCGCATTACAGCCCCGAGCATGAAAGAGGCCGAAAACCTCGCCAATATTAAAAAAGAGTTGCGTCTCCGCGGCTATAATGTTCCCCTGGTCGCCGACATCCACTTCACTCCAAATGCGGCGGAGGCCGCTGCTCGCATCGTTGAAAAGGTTCGCGTCAATCCGGGTAACTACGCCGATAAAAAACGTTTCGAAAATATTGAATATACCCACCAGGCTTACCAG…
Phycisphaera mikurensis NBRC 102666	BAM02738.1	pIspG30	ATGCCAATTCATCGCCGCAAGACACGCCAGGTGAGTGTGGGTGACGAACGCGTTGGTGTTGTGAAGATTGGTGGAGACGCGCCTGTTAGTGTGCAGAGCATGACTAGTGGATACACATTTGAGGTCGACGCCTGCGTCGCAGAGATCAACCGTCTTGCCGACGCAGGCGCAGACATCGTTCGTGTGGCAGTACCTAATAAGAAGGATACTGCGGCGTTGAAGGACGTGCTGCCTCGTGTAAAAGTGCCTATCGTAGCCGATGTGCACTTTCATTTCGGTCGCGCCCTGGAAGCGGTTGAGTCGGGAGTTCACAAGATCCGCTTAAATCCAGGGAATATTCAAGACCGCGGCCATGTGAAAGAAGTGATTGCAGCCTGCAAGGAGCGTGGGTTACCAATT…
Rhodobacter sphaeroides 2.4.1	ABA79143.1	pIspG31	ATGTCTCTGAACCACGTTCGTCCGTGGCGTAACATCCACCGTCGTAAATCTCGTCAGATCATGGTTGGTAACGTTCCGGTTGGTGGTGACGCTCCGATCTCTGTTCAGACCATGACCAACACCATCACCGCTGACGCTCCGGCTACCATCGCTCAGGTTCTGCGTGCTGCTGAAGCTGGTGCTGACATCGTTCGTGTTTCTGTTCCGGACGAAGCTTCTACCCGTGCTCTGAAAGAAATCGTTGCTGCTTCTCCGGTTCCGATCGTTGCTGACATCCACTTCCACTACAAACGTGCTATCGAAGCTGCTGAAGCTGGTGCTGCTTGCCTGCGTATCAACCCGGGTAACATCGGTGACGCTTCTCGTGTTCGTGAAGTTATCAAAGCTGCTCGTGACCAC…
Rubrobacter xylanophilus DSM 9941	ABG04368.1	pIspG32	ATGACGGAAACAACGGTTCGCGAGCGCCCGGTCACATCTCGACGCATTATGGTGGGCGATGTGCCAATCGGCGGAGGGGCCCAGATTGTGGTTCAGTCGATGACGAATACGCCGACCCACGATGTCGAAGCGACGGTGCAGCAAATCTACGACCTGAACGCAGCGGGTGCCGAGCTGGTACGTGTTTCTGTAAATGGCAGTAAAGCACTTAAGGGCTTTCGCGAGATAGTGCCGCGATCCCCCGTGCCTTTAATTGCGGATATTCATTTTGACTATCGCATGGCTCTCGGGGCCGCCGATGCAGGCGCCGCGTGTGTGCGCATCAACCCAGGTAACATTGGCTCGGATGACCGCTTCCGTAAAGTGATTGAAAAATGCCAGGAAAAAGGTATTGCGATG…
Ruminiclostridium cellulolyticum H10	ACL74833.1	pIspG33	ATGGAGGACTGTATAAAGCGTAACCAGACCAAAAAGATTAAAGTAGGGGATATTTTCATCGGCGGCGACAGCCCGATTTCTGTGCAATCGATGACAAACACTGACACCCGCGATGTGAAGGCGACGATACACCAGATCAAGAGTCTCGAAGAGGCCGGTTGTGATATCGTCCGCTTGGCAATTCTGGATAATGAAGCGGCAACCGCGATTGGTGAAATCAAAAAACACGTGAAAATTCCGCTGGTCGCGGACATCCATTATGACTATCGTTTGGCGGTAGAGTGTATGAAGAACGGCGTCGACAAAATACGCTTGAACCCGGGTAACATCGGTGGCAACGACCGCGTGCGTACTGTCGCCGGCATGGCAAAAGAACGCGGCATCCCTATCAGAATTGGG…
Salinivirga cyanobacteriivorans	ALO15331.1	pIspG34	ATGACTGATAAGTTTCCGTATCCTTTAAATCAACATAAACGCTTTCAGACGGAACAAGTCCACGTGGGAAATGTTAGCATCGGCGGTGATGCTCCGGTCCGCATCCAGAGCATGTGCAATACCGCTACTACAAACGTTGAAGCGTCTGTGAAGCAAACTATTGAAATTATTGAAGCGGGTGGAGAGCTGGTTCGTTACACTGTTCGCCACCGCAAAGATGCAGATGGTCTTATTGCCATTAGCAAGCGTTTGAAAGCGATGGGTTACGATACACCCATTGTTGCTGATGTCCATTTTAACGCCGATCTCGCAGTTATGCTGGCGGGGTCCTCAATCGAAAAGGTTCGCATTAATCCGGGTAACTTTGTGGACAAACGCGCAAAGTTCGAAGAATCAAAA…
Sphaerobacter thermophilus DSM 20745	ACZ37901.1	pIspG35	ATGGTCGCCCCGCGGCGGAAAACCCGGGCGATTCATGTGGGCGATGTCCAAATCGGAGGGGGCGCGCCGGTGGTTGTCCAGTCGATGGCAACGGCCGATACCCGCGATCCGAAAGCAACACTGCGTCAAATTCACGAGCTGGCCGATGCCGGTTGCGAGATCGTGCGCATTGCGGTGCCGGATCGTGTGGCTGCGGCTGCACTGCCTGAAATCGTCCCGCATTCTCCGGTGCCACTGATTGCGGATATTCATTTCGAACATACGCTGGCGTTGAAAGCTATCGATGCCGGTATTCATGGTTTGCGTCTGAACCCTGGTAACATTCGCAAACCGGAAGACGTTCGCGAAGTGGTAACCAAAGCTAAAGAACGTGGCATTCCTATCCGTATTGGCGTGAAC…
Spirochaeta thermophila DSM 6578	WP_014624852.1	pIspG36	ATGGGAGATATGTCGCAACGTGAACATTTTGTTCCGCCGGAGGGTGGCCGAGAAGTGTATACTACGAAAGCCGTGCCGGTGGGTTCTCTTGTGATCGGTGGCGGCGCCCCGCTCGTCGTGCAGACGATGTGGAAAGGTCCTTTAACGCCGGAGACCGTTTCGACGATTGTTGAGGAACTGGAACGTCTTTCTAAAATGGGCTGCGGTCTGATGCGCTTTGCCGTCCCGGACATGACCGCTGCCGAGGTGGTTGGCCGTATCGCCGAACGCAGTCTGATGCCGGTAGTGGCCGACATCCACTTCGACTGGCGTCTCGCGCTCAGGGTCATGGATTTCCCCGTGGCCAAGGTACGGATCAACCCGGGTAACATCGGGGCCCGATGGAAGGTCGAAGAAGTG…
Spiroplasma citri	APE74616.1	pIspG37	ATGAACAAACGGAATAACACCCGCAAAGTAATGGTTGGGAACGTACAGATTGGTGGTCAAAACAAGGTTGTAATCCAGTCTATGACCAACACCAAAACGCACGACGTTGAAAGTACCTTAACGCAAATTAACCAGCTGTACCAAGAAGGTTGCGAAATCATTCGGATTGCCGTGCTTGGCAAGGATGACGCCGCGGTGTTAAAAACCATTGTCGAACGCTCCCCTTGTCCGCTCGTGGCCGACATTCACTTCAACTATGAATTCGCACTGATTGCGGCCGACTCAGGCATTAGCAAAATCCGTATCAACCCAGGTAATATTGGCTCGATTGAGAACACAAAGAAAGTTGTCGAGAAATGCCTGGAAAAAAAAATTCCGATTCGCATTGGGGTCAACTCG…
Streptomyces cattleya NRRL 8057 = DSM 46488	AEW97312.1	pIspG38	ATGACACAAACTGTATCACTAGGAATGCCCTCCGTTCCGCTGAAACTGGCCGACCGTCGTCGCTCTCGTCAAATTCAGGTTGGTTCGGTGGCTGTGGGTGGTGATGCTCCGGTTAGCGTCCAGTCCATGACCACCACGGTGACTGCGGACATCGGCGCAACCCTGCAGCAGATCGCGGAGCTGACCGCTGCGGGGTGCCAGATCGTTCGCGTGGCGTGTCCGAGCCAAGATGACGCCGACGCGTTACCGGTCATTGCGCGTAAAAGCCAAATTCCGGTCATCGCAGACATCCACTTCCAGCCAAAATACGTTTTCGCTGCGATTGATGCGGGCTGCGCAGCCGTTCGCGTGAATCCGGGTAATATCCGCCAATTTGACGACAAAGTGAAAGAAATTGCG…
Streptomyces coelicolor A3	CAB91132.1	pIspG39	ATGACTGCTATCTCACTGGGCATGCCGGACGTACCGACTAGACTGGCGGAACGCCGCAAATCACGCCAAATTCAAGTTGGCCCTGTTGCGGTGGGTGGTGACGCGCCTGTTAGTGTCCAGTCTATGACTACGACCCGCACAAGTGATATTGGCGCCACTCTGCAGCAGATCGCGGAACTTACTGCATCTGGCTGTCAGATTGTCCGTGTTGCGTGTCCGACACAGGATGACGCCGATGCACTGCCAGTCATCGCACGGAAAAGCCAGATCCCGGTTATAGCGGATATTCATTTTCAGCCTAAATATGTTTTTGCAGCGATTGAAGCGGGCTGTGCGGCGGTACGCGTAAACCCGGGTAACATCAAACAGTTCGACGATAAAGTAAAAGAAATTGCTAAG…
Symbiobacterum thermophilum IAM 14803	BAD40486.1	pIspG40	ATGATCGAACGCCGTAAGACCCGAGCGGTGAAAGTCGGTCGTGTACAGATCGGAGGTGGGGCTCCTATCACAGTACAGAGCATGACCAAGTGTGATACGCGTGACGTGCCTGAAGTGTTGCGCCAAATACGTGCCCTCGAAGAGGCAGGCTGTGATATCGTCCGAGTAGCAGCCCCGACTATGGAGGCTGCCGAATGCTTTAAAGAGATTAGGAAAGGTTGTAATATCCCGCTGGTGGCGGACGTCCACTTCGACTATCGCATCGCCTTGAAAGTTCTAGAAGCAGGCATTGATAAGTTGCGTATCAATCCAGGGAACATCGGTGCTAGATGGAAAGTGGAAGAAGTCGTCCGTGCCTGTAAAGACCGTGGCGTTCCGATCCGCATTGGGGTCAATGCC…
Synechocystis sp. PCC 6803	BAA17717.1	pIspG41	ATGGTTACCGCTTCTCTGCCGACCCCGGTTCAGCCGGAATTTGACACCACCATCCACCGTCGTAAAACCCGTCCGGTTCCGGTTGGTGCTGTTACCGTTGGTGGTGGTCACCCGGTTGTTGTTCAGTCTATGATCAACGAAGACACCCTGGACGTTGACGGTTCTGTTGCTGGTATCCGTCGTCTGCACGAAATCGGTTGCGAAATCGTTCGTGTTACCGTTCCGTCTATGGCTCACGCTAAAGCTCTGGCTGACATCAAACAGAAACTGCAGGCTACCTACCAGGCTGTTCCGCTGGTTGCTGACGTTCACCACAACGGTATGAAAATCGCTCTGGAAGTTGCTAAACACGTTGACAAAGTTCGTATCAACCCGGGTCTGTACGTTTTCGAAAAACCG…
Thermanaerovibrio acidaminovorans DSM 6589	ACZ19163.1	pIspG42	ATGGCGTCGCTGAATGGTGTCAGTATCGGCGGTCTTAGCGTTGGCGGCGGAGCGCCGGTTCGCGTGGAGTCGATGCTGAAAACCCCGCTGGAAGATCTCGAAGGGTGCCTTCGTGAACTGGAAGGCCTCGTGGCCGAAGGATGCGAACTGGTACGCACCTCTTACCGCGATGCAGGGCTGGAAGGCTGTTTGCGCGAATTGGTGTCCGGAAGCTCGATCCCCATCATGGCAGATATCCACTTTGATCACCGGCTGGCATTAAGCGCTATGGACGCGGGCTGCCAGGCCATTCGCGTCAACCCGGGTAACCTGGGCGGCCGCGATAACTTACTTACGGTCCTGCGGCGCGCAATGGATTTGGGTGTGGTTATTCGGGTGGGCGCCAACGGTGGATCACTG…
Thermodesulfatator indicus DSM 15286	AEH44631.1	pIspG43	ATGCCAAAGATCACTCGCAAGAACACACGTACAATTCGTATTGGCAACGTCTTCATCGGTGGTGGCCAACCAGTTCTGGTTCAGAGTATGACGAACACCGACACGCGCGACATCGTTGCAACTGTGGCCCAAATCAAACGCCTGGAAGAGGTCGGTTGTGAGTTGATCCGCGTTGCTGTCCCTGACGAAGAGGCCGCGCAAGCAATCAAGAAAATCAAGAACCAGATTCGCATCCCTCTCGTCGCAGACATCCACTTCGATTGGCGCCTCGCTATCTCGAGTCTTGAAGCTGGCGCTGACGGGATTCGTATTAACCCTGGTAATATTAAGGGGCTGGATAATGTTCGCAAAGTTGTTTTAGCGGCGAAGGAGCAGGGCGCGGCAATTCGTATTGGTGTT…
Thermoleophilum album	SEH14556.1	pIspG44	ATGGCATCCAAGCGTCAGATCCGCGTGGGTGGTGTCCCTATCGGCGGTGGGGCACCCGTGGCGGTCCAGTCGATGACTAAGACTGAAACCGCAGACGTCGCCGCAACACTCGCCCAAATCCAGCGTATTGCCGAAGCGGGCGCAGACTTAGTGCGCGTCGCAGTTCCGCGCGACAAGGATGTCCAGGCCCTTCGCGAATTGGTACGCCGCTCGCCGATCCCTATCGTAGCTGATATCCATTTCAATCACACGCTGGCCCTTAAGGCCGTGGACGCAGGCGCGCATTGTGTGCGTATTAACCCTGGCAACATCGGTGGGCGCGAGAAATTGGGAGAAGTTGTAGAGAAGGCCCGCAGCGCCGGCGTCCCTTTACGTATTGGCGTTAACTCCGGTAGCCTT…
Thermotoga maritima MSB8	AAD35972.1	pIspG45	ATGCGTAAATCTGTTAAAGTTGGTAAAGTTGTTATCGGTGGTGAAGCTCCGGTTTCTGTTCAGTCTATGACCACCACCAAAACCGCTGACGTTGAAAAAACCGTTTCTCAGATCAAATCTCTGGAACGTGCTGGTTGCGAAATCGTTCGTGTTGCTGTTCAGGACGAAGAAGACGCTAAAGCTATCCGTCGTATCAAAGAACAGATCGAAATCCCGCTGGTTGCTGACATCCAGTTCGACTACCGTCTGGCTATCCTGTCTATCGAAAACGGTGCTGACAAAATCCGTATCAACCCGGGTAACATGTCTCGTGACCGTCTGAAAGACGTTGTTGCTGCTGCTAAAGGTAAAGGTATCCCGATCCGTGTTGGTGCTAACGTTGGTTCTATCAAACGTCGT…
Thermovibrio ammonificans HB-1	ADU96577.1	pIspG46	ATGGGTTGGATCGAACGCCGGAAAACCCGCACAGTCTGGGTTGGAAGTGTTCCTGTAGGTGGCAGCCATCCGGTCGTGGTCCAATCAATGACTAACACGTATACAGAAGATGTAGAGTCGACCGTGAAGCAAATTAAAGAACTGGAACGCGTGGGTTGTGAACTGGTCCGTGTTGCTGTCCCAACCCCGGAGGCTGCACGTGCCGTTAAAGCAATTAAAGAACGCATTGGCATCCCGCTTATTGCGGACATCCATTTTGATCATCGCTTAGCACTGCTGGCCATTGAATCGGGAGCCGATTGTGTTCGCATTAACCCGGGCAACATCGGGTCACGCGAGAAAGTCAAAGAAATCGTTGAGTTAGCACGTGAACGTGGCGTGGCCATTCGTGTTGGCGTC…
Thermus thermophilus HB27	AAS82019.1	pIspG47	ATGCGTCGTCCTACGCCGACGGTGTATGTGGGGCGCGTACCTATCGGTGGCGCTCACCCGATCGCCGTGCAGAGCATGACTAACACGCCTACCCGTGACGTGGAAGCGACAACGGCCCAGGTTTTGGAGCTTCACCGTGCGGGGTCTGAAATTGTGCGCCTGACCGTCAATGATGAGGAAGCCGCCAAAGCGGTGCCGGAAATCAAACGACGCCTGCTGGCAGAGGGTGTCGAAGTGCCGCTGGTTGGTGATTTCCATTTCAACGGCCACCTCTTGCTGCGCAAATACCCGAAGATGGCAGAAGCGTTGGACAAATTTCGTATTAATCCGGGAACGCTGGGTCGCGGGCGCCACAAAGATGAACATTTCGCGGAAATGATCCGCATTGCCATGGATCTT…
Victivallales bacterium CCUG 44730	AVM43904.1	pIspG48	ATGCCGATTCGCCGGTCTCGCCGGCAACCGCCACGTAAAATTCGCCAGGGTCAGAAACGGCGTCGCCCGATGGCAGCTTCCCGCCGGAATTCCCGCCTCATCCGCGTGGGCGCCGTGGCTGTAGGCGGTGATAGCCCGGTCTCGATTCAGTCTATGACCAATACCGATACTCGCGATGCTGCAGCCACGCTCAATCAAATTCGTGCCTTGCACCGCTTAGGATGTCAAATCATTCGCGTGGCAGTTCCGGACCCCGCGGCAGCGGCGGCGATTCGTGCGATTCGCGCCGAAAGCCCAATCCCAGTCGTTGCCGACATTCATTTTGATTATCGTTTGGCCCTGGCTGCAATGGAAAATGGGGCGGACGCGATCCGCCTTAACCCGGGGAATTTAAACGAC…
