# Supplementary material for: Cellular assays identify barriers impeding iron-sulfur enzyme activity in a non-native prokaryotic host
Source: eLife. 2022 Mar 4;11:e70936. doi: 10.7554/eLife.70936 (PMC8896826; doi:10.7554/eLife.70936)
Supplement: Supplementary file 5. — Re-activation of IspG orthologs was tested first by co-expressing all genes as a multi-cistronic operon: (+) indicating positive complementation; (-) indicating no complementation observed against any IspG ortholog tested. For cases in which individual electron carriers and Fe-S biogenesis proteins were sub-cloned for complementation testing, proteins activating at least one heterologous IspG ortholog (positive complementation) are indicated by (+), while proteins that did not activate IspG (no complementation) are indicated by (-). [file elife-70936-supp5.xlsx]

## Sheet: Feuil1
Supplementary File 5. Plasmids used to test recovery of inactive NadA and IspG orthologs.
Phylogenetic-based set
Species/Strain	Plasmid Name	Proteins encoded	Accession number	Complementation of native IspG	Source
E. coli str. K-12 substr. MG1655	pBbA5a-sufABCDSE (pEcSUF)	SufA	WP_000367160.1	N.A.	E. coli genomic DNA
		SufB	WP_000089364.1
		SufC	WP_000948863.1
		SufD	WP_000907979.1
		SufS	WP_000577988.1
		SufE	WP_001196530.1
Bacillus subtilis subsp. subtilis str. 168	pBbA5a-sufBCDSU (pBsSUF)	SufB	WP_003228608.1﻿	-	B. subtilis genomic DNA
		SufC	WP_003151872.1﻿
		SufD	WP_003228602.1﻿
		SufS	WP_003228604.1﻿
		SufU	WP_003222809.1﻿
	pBbA5a-ykuP-yutM	YkuP	WP_009967131.1	+
		YutM	WP_003244166.1
	pATC_Bsub_yutM	YutM	WP_003244166.1	-
	pEC_Bsub_ykuP	YkuP	WP_009967131.1	+
	pEC_Bsub_ykuN	YkuN	WP_003232386.1	+
Synechocystis sp. PCC 6803	pATC_EC_Synecho	IsiB	BAA17947.1	+	Codon-optimized synthetic DNA (Twist Bioscience)
		PetF	WP_010873424.1
		NfuA homolog	BAA18665.1
		SufA homolog	BAA16746.1
	pEC_Synecho_isiB	IsiB	BAA17947.1	-
	pEC_Synecho_petF	PetF	WP_010873424.1	+
Streptomyces cattleya NRRL 8057 = DSM 46488	pATC_EC_Scatt	IscA homolog	WP_014142045.1	-	Codon-optimized synthetic DNA (Twist Bioscience)
		NifU homolog	WP_014143687.1
		flavodoxin	WP_014143262.1
		Flavodoxin	WP_014628745.1
		Ferredoxin	WP_010474859.1﻿
		Ferredoxin	WP_014145872.1
	pEC_Scatt_fdx123 (pSc Fdx)	Fdx1	AEW96347.1	+
		Fdx2	AEW92689.1
		Fdx3	AEW97532.1
	pEC_Scatt_fdx1	Fdx1	AEW96347.1	+
	pEC_Scatt_fdx2	Fdx2	AEW92689.1	-
	pEC_Scatt_fdx3	Fdx3	AEW97532.1	+
Rhodobacter sphaeroides	pATC_EC_Rsph	flavodoxin	WP_011910129.1	+	Codon-optimized synthetic DNA (Twist Bioscience)
		ferredoxin reductase	WP_011907396.1
		IscA homolog	WP_011908234.1
		IscA homolog	WP_011907404.1
		ErpA/SufA homolog	WP_011908293.1
		NifA homolog	YP_353605.1
		ferredoxin 1	WP_002719579.1
		ferredoxin 2	YP_351799.1
		ferredoxin 3	YP_353428.1
		ferredoxin 4	YP_354707.1
	pEC_RsphFdx1	ferredoxin 1	WP_002719579.1	+
	pEC_RsphFdx2	ferredoxin 2	YP_351799.1	-
	pEC_RsphFdx3	ferredoxin 3	YP_353428.1	-
	pEC_RsphFdx4	ferredoxin 4	YP_354707.1	-
	pEC_RsphFld	flavodoxin	WP_011910129.1	-
Mariprofundus ferrooxydans	pATC_EC_Mferr	NifU	WP_018295173.1	+	Codon-optimized synthetic DNA (Joint Genome Institute)
		ErpA	WP_009850809.1
		A-type carrier	WP_009850219.1
		SufT	WP_009849727.1
		ferredoxin	WP_009849679.1
		flavodoxin	WP_018295182.1
Streptomyces coelicolor A3	pATC_EC_Scoel	sufU	NP_626185.1	-	Codon-optimized synthetic DNA (Joint Genome Institute)
		sufT	NP_733551.1
		ferredoxin	NP_626188.1
		A-type carrier	WP_003976654.1
		ferredoxin	WP_003973842.1
		ferredoxin	WP_011031438.1
Collinsella stercoris DSM 13279	pATC_EC_Cster	SufU	WP_006721131.1	-	Codon-optimized synthetic DNA (Joint Genome Institute)
		ferredoxin	WP_006720722.1
Coraliomargarita akajimensis DSM 45221	pATC_EC_Cakaj	SufT	WP_013042958.1	-	Codon-optimized synthetic DNA (Joint Genome Institute)
		A-type carrier	WP_013042609.1
		A-type carrier	WP_013042938.1
		ferredoxin	ADE55879.1
		ferredoxin	WP_013043862.1
		ferredoxin	WP_013044567.1
Desulfitobacterium hafniense DCB-2	pATC_EC_Dhafn	SufU	WP_015944678.1	-	Codon-optimized synthetic DNA (Joint Genome Institute)
		A-type carrier	WP_005812671.1
		ferredoxin	WP_005809805.1
		flavodoxin	WP_015942998.1
		flavodoxin	WP_015942998.1
Nitrospina gracilis	pATC_EC_Ngrac	SufU	WP_005005647.1	-	Codon-optimized synthetic DNA (Joint Genome Institute)
		A-type carrier	WP_005009274.1
		SufT	WP_042251137.1
Isosphaera pallida ATCC 43644	pATC_EC_Ipall	Rieske ferredoxin	ADV63793.1	-	Codon-optimized synthetic DNA (Joint Genome Institute)
		DUF59	ADV63794.1
		A-type carrier	WP_013566507.1
		ferredoxin	WP_013564395.1
Allochromatium vinosum	pATC_EC_Avino	ErpA	WP_012969355.1	-	Codon-optimized synthetic DNA (Joint Genome Institute)
		ferredoxin	WP_012972054.1
Preliminary set
Species/Strain	Plasmid Name	Proteins encoded	Accession number	Complementation of native IspG	Source
Jonesia denitrificans	pATC_EC_Jdeni	SufU	WP_015771429.1	-	Codon-optimized synthetic DNA (Joint Genome Institute)
		SufT	WP_015771430.1
		ferredoxin	WP_015771426.1
		A-type carrier	WP_015771734.1
		ferredoxin	WP_015771091.1
Nostoc punctiforme	pATC_EC_Npunc	A-type carrier	WP_012407303.1	+	Codon-optimized synthetic DNA (Joint Genome Institute)
		A-type carrier	WP_012407189.1
		A-type carrier	WP_012410235.1
		ferredoxin	WP_012410088.1
		ferredoxin reductase	WP_012409282.1
Cyanothece sp. ATCC 51142	pATC_EC_Cyano	DUF4351	WP_083765699.1	-	Codon-optimized synthetic DNA (Joint Genome Institute)
		ndk	WP_009545932.1
		A-type carrier	WP_008277352.1
		A-type carrier	WP_009546650.1
		A-type carrier	WP_009543828.1
		ferredoxin	WP_009544409.1
		ferredoxin reductase	WP_009547107.1
Crocosphaera watsonii WH 8501	pATC_EC_Cwats	A-type carrier	CCQ55256.1	-	Codon-optimized synthetic DNA (Joint Genome Institute)
		A-type carrier	WP_007305811.1
		ferredoxin	WP_007307709.1
		ferredoxin reductase	WP_007305665.1
Geobacillus thermodenitrificans NG80-2	pATC_EC_Gther	SufU	WP_008880228.1	-	Codon-optimized synthetic DNA (Joint Genome Institute)
		ErpA	WP_008881826.1
		HesB	WP_008879296.1
		A-type carrier	WP_008879736.1
		ferredoxin	WP_029761088.1
Heliobacterium modesticaldum Ice1	pATC_EC_Hmode	SufU	WP_012282927.1	-	Codon-optimized synthetic DNA (Joint Genome Institute)
		A-type carrier	WP_012282546.1
		ferredoxin	WP_012282550.1
		ferredoxin	WP_012283549.1
		ferredoxin	WP_012282549.1
		flavodoxin	ABZ83905.1
Marichromatium purpuratum	pATC_EC_Mpurp	ErpA	WP_005221718.1	+	Codon-optimized synthetic DNA (Joint Genome Institute)
		flavodoxin	WP_005222865.1
		ferredoxin	WP_005222218.1
Lamprocystis purpurea	pATC_EC_Lpurp	ErpA	WP_020505276.1	-	Codon-optimized synthetic DNA (Joint Genome Institute)
		ferredoxin	WP_026199859.1
Jannaschia sp. CCS1	pATC_EC_Janna	A-type carrier	WP_011455646.1	-	Codon-optimized synthetic DNA (Joint Genome Institute)
		A-type carrier	WP_011454628.1
		ferredoxin	WP_011456428.1
		ferredoxin	WP_011456863.1
		ferredoxin	WP_011453798.1
Novosphingobium aromaticivorans DSM 12444	pATC_EC_Novos	DUF559	WP_011443859.1	-	Codon-optimized synthetic DNA (Joint Genome Institute)
		SufT	WP_011443863.1
		SufA	WP_011443864.1
		A-type carrier	WP_041549870.1
		ferredoxin	WP_011444774.1
		ferredoxin	WP_011443786.1
Erythrobacter longus	pATC_EC_Elong	A-type carrier	WP_034960582.1	-	Codon-optimized synthetic DNA (Joint Genome Institute)
		A-type carrier	WP_034960548.1
		SufT	WP_034960550.1
		ferredoxin	WP_034960615.1
Roseobacter denitrificans	pATC_EC_Rdeni	A-type carrier	WP_011569291.1	-	Codon-optimized synthetic DNA (Joint Genome Institute)
		A-type carrier	WP_011569096.1
		SufT	WP_011569094.1
		ferredoxin	WP_011568059.1
Herminiimonas arsenicoxydans	pATC_EC_Harse	IscU	WP_011871641.1	+	Codon-optimized synthetic DNA (Joint Genome Institute)
		IscA	WP_011871640.1
		ferredoxin	WP_041322489.1
		ErpA	WP_011869820.1
		ferredoxin	WP_011870335.1
		ferredoxin	WP_011871122.1
		ferredoxin	WP_011872269.1
Nitrosococcus oceani	pATC_EC_Nocea	ErpA	WP_002810132.1	-	Codon-optimized synthetic DNA (Joint Genome Institute)
		ferredoxin	WP_011330254.1
		ferredoxin	WP_002809025.1
Plasmodium falciparum UGT5.1	pATC_EC_Pfalc	NifU	XP_001348692.1	-	Codon-optimized synthetic DNA (Joint Genome Institute)
		A-type carrier	XP_001351784.1
		ferredoxin	XP_001349917.1
Methylacidiphilum infernorum V4	pATC_EC_Minfe	SufT	WP_012464804.1	-	Codon-optimized synthetic DNA (Joint Genome Institute)
		ErpA	WP_012462806.1
		A-type carrier	WP_148205089.1
		A-type carrier	WP_012462807.1
		A-type carrier	WP_012462741.1
		ferredoxin	WP_012463586.1
		Rieske ferredoxin	WP_012464796.1
		ferredoxin	WP_012463484.1
