# Supplementary material for: Cellular assays identify barriers impeding iron-sulfur enzyme activity in a non-native prokaryotic host
Source: eLife. 2022 Mar 4;11:e70936. doi: 10.7554/eLife.70936 (PMC8896826; doi:10.7554/eLife.70936)
Supplement: Supplementary file 6. — IspG orthologs belonging to the phylogenetically-based set and orthologs from the preliminary survey that were not included in the phylogenetic set are depicted separately. Minus (-): negative complementation; plus (+): positive complementation; (+/-): growth detected but substantially slower than with E. coli ortholog; N.T.: not tested. The rightmost column, provided to summarize reactivation experiments, indicates IspG orthologs that were successfully activated by at least one plasmid. [file elife-70936-supp6.xlsx]

## Sheet: Feuil1
Supplementary File 6. Results of IspG complementation/reactivation experiments using plasmids listed in Supplementary File 5.
Phylogenetic-based set
Phylum	Species/Strain	Accession number	Complementation / Recovery with native Fld/Fd			Recovery with heterologous Fld/fd				Recovery summary
			pIspG	pIspG + native ETP	plasmid used	pEC_Synecho_petF	pBbA5a-ykuP-yutM	pEC_Scatt_fdx123	pEC_RsphFdx1	pIspG + Fld or Fd
Acidobacteria	Candidatus Koribacter versatilis Ellin345	ABF40425.1	-	N.T.		N.T.	N.T.	N.T.	N.T.	N.T.
Actinobacteria	Thermoleophilum album	SEH14556.1	-	N.T.		N.T.	N.T.	N.T.	N.T.	N.T.
	Streptomyces coelicolor A3	CAB91132.1	-	-	pATC_EC_Scoel	-	-	-	-	-
	Rubrobacter xylanophilus DSM 9941	ABG04368.1	+	N.T.		N.T.	N.T.	N.T.	N.T.	N.T.
	Cutibacterium acnes KPA171202	AAT83253.1	+	N.T.		N.T.	N.T.	N.T.	N.T.	N.T.
	Collinsella stercoris DSM 13279	EEA90248.1	-	-	pATC_EC_Cster	-	-	-	N.T.	-
	Acidimicrobium ferrooxidans DSM 10331	ACU53587.1	+	N.T.		N.T.	N.T.	N.T.	N.T.	N.T.
	Streptomyces cattleya NRRL 8057 = DSM 46488	AEW97312.1	-	+	pEC_Scatt_fdx1	-	-	+	N.T.	+
	Egibacter sp.	PWFH01000026.1_54	-	N.T.		N.T.	N.T.	N.T.	N.T.	N.T.
Aquificae	Aquifex aeolicus VF5	AAC07467.1	+	N.T.		N.T.	N.T.	N.T.	N.T.	N.T.
	Thermovibrio ammonificans HB-1	ADU96577.1	-	N.T.		N.T.	N.T.	N.T.	N.T.	N.T.
Bacteroidetes	Pedobacter heparinus DSM 2366	ACU05649.1	-	N.T.		N.T.	N.T.	N.T.	N.T.	N.T.
	Salinivirga cyanobacteriivorans	ALO15331.1	-	N.T.		N.T.	N.T.	N.T.	N.T.	N.T.
Candidatus Fermentibacteria	Candidatus Fermentibacter daniensis	KZD16972.1	-	N.T.		N.T.	N.T.	N.T.	N.T.	N.T.
Candidatus Melainabacteria	Candidatus Caenarcanum bioreactoricola	MOYB01000001.1_3	-	N.T.		N.T.	N.T.	N.T.	N.T.	N.T.
	Candidatus Gastranaerophilales bacterium HUM_7	DAA93923.1	-	N.T.		N.T.	N.T.	N.T.	N.T.	N.T.
Candidatus Sumerlaeota	Candidatus Sumerlaea chitinovorans	AXA34785.1	-	N.T.		N.T.	N.T.	N.T.	N.T.	N.T.
Chlamydiae	Chlamydia caviae GPIC	AAP05169.1	-	N.T.		-	-	-	N.T.	-
Chloroflexi	Sphaerobacter thermophilus DSM 20745	ACZ37901.1	-	N.T.		N.T.	N.T.	N.T.	N.T.	N.T.
Cyanobacteria	Gloeobacter violaceus PCC 7421	BAC91563.1	-	N.T.		-	N.T.	N.T.	N.T.	-
	Synechocystis sp. PCC 6803	BAA17717.1	-	+	pEC_Synecho_petF	+	-	-	N.T.	+
Deinococcus-Thermus	Thermus thermophilus HB27	AAS82019.1	-	N.T.		-	-	-	N.T.	-
Fibrobacteres	Fibrobacter succinogenes subsp. succinogenes S85	ACX75977.1	-	N.T.		N.T.	N.T.	N.T.	N.T.	N.T.
Firmicutes	Bacillus subtilis subsp. subtilis str. 168	CAB14437.1	-	+	pBbA5a-ykuP-yutM	+	+	+	N.T.	+
	Desulfitobacterium hafniense DCB-2	ACL21716.1	-	-	pATC_EC_Dhafn	-	-	-	N.T.	-
	Symbiobacterium thermophilum IAM 14863	BAD40486.1	-	N.T.		N.T.	-	N.T.	N.T.	-
	Ruminiclostridium cellulolyticum H10	ACL74833.1	-	N.T.		-	-	-	N.T.	-
Lentisphaerae	Victivallales bacterium CCUG 44730	AVM43904.1	-	N.T.		N.T.	N.T.	N.T.	N.T.	N.T.
Nitrospinae	Nitrospina gracilis	CCQ91393.1	-	-	pATC_EC_Ngrac	-	N.T.	N.T.	N.T.	-
Planctomycetes	Blastopirellula marina DSM 3645	EAQ77076.1	+/-	N.T.		+	+	-	N.T.	+
	Isosphaera pallida ATCC 43644	ADV63232.1	-	-	pATC_EC_Ipall	-	-	-	N.T.	-
	Phycisphaera mikurensis NBRC 102666	BAM02738.1	-	N.T.		N.T.	N.T.	N.T.	N.T.	N.T.
Proteobacteria	Aeromonas hydrophila	ABK39186.1	+	N.T.		N.T.	N.T.	N.T.	N.T.	N.T.
	Allochromatium vinosum	ADC62931.1	-	-	pATC_EC_Avino	N.T.	N.T.	N.T.	N.T.	-
	Azoarcus sp. BH72	CAL93544.1	+	N.T.		N.T.	N.T.	N.T.	N.T.	N.T.
	Helicobacter pylori J99	WP_000892444.1	-	N.T.		-	-	N.T.	N.T.	-
	Methylococcus capsulatus str. Bath	AAU91397.1	+	N.T.		N.T.	N.T.	N.T.	N.T.	N.T.
	Rhodobacter sphaeroides 2.4.1	ABA79143.1	-	+	pEC_RsphFdx1	-	-	-	+	+
	Mariprofundus ferrooxydans	EAU54713.1	-	+	pATC_EC_Mferr	N.T.	N.T.	N.T.	N.T.	+
	Cellvibrio japonicus Ueda107	ACE82628.1	-	N.T.		-	-	-	N.T.	-
	Escherichia coli str. K-12 substr. MG1655	AAC75568.1	+	N.T.		N.T.	N.T.	N.T.	N.T.	N.T.
	Anaplasma phagocytophilum str. CRT38	EOA62006.1	-	N.T.		N.T.	N.T.	N.T.	-	-
Spirochaetes	Spirochaeta thermophila DSM 6578	WP_014624852.1	-	N.T.		N.T.	N.T.	-	N.T.	-
Synergistetes	Thermanaerovibrio acidaminovorans DSM 6589	ACZ19163.1	-	N.T.		N.T.	N.T.	N.T.	N.T.	N.T.
Tenericutes	Spiroplasma citri	APE74616.1	-	N.T.		N.T.	N.T.	N.T.	N.T.	N.T.
Thermodesulfobacteria	Thermodesulfatator indicus DSM 15286	AEH44631.1	-	N.T.		N.T.	N.T.	N.T.	N.T.	N.T.
Thermotogae	Thermotoga maritima MSB8	AAD35972.1	-	N.T.		-	-	-	N.T.	-
Verrucomicrobia	Coraliomargarita akajimensis DSM 45221	ADE56011.1	-	-	pATC_EC_Cakaj	-	-	-	N.T.	-
Preliminary Set orthologs not included in phylogenetic-based set
Phylum	Strains	Accession number	Complementation / Recovery with native Fld/Fd			Recovery with heterologous Fld/fd				Recovery summary
			pIspG	pIspG + native ETP	plasmid used	pEC_Synecho_petF	pBbA5a-ykuP-yutM	pEC_Scatt_fdx123	pEC_RsphFdx1	pIspG + Fld or Fd
Actinobacteria	Jonesia denitrificans	WP_015771297.1	-	-	pATC_EC_Jdeni	-	-	+	N.T.	+
Chlamydiae	Chlamydia pneumoniae AR39	WP_010883016.1	-	N.T.	N.T.	-	-	-	N.T.	-
	Nostoc punctiforme	ACC83392.1, WP_012411346.1	+/-	+	pATC_EC_Npunc	+	-	+	N.T.	+
	Cyanothece sp. ATCC 51142	ACB51662.1, WP_009544989.1	-	-	pATC_EC_Cyano	+	-	-	N.T.	+
	Crocosphaera watsonii WH 8501	EAM48116.1, WP_007308082	-	-	pATC_EC_Cwats	+	-	+	N.T.	+
	Thermosynechococcus elongatus BP-1	BAC08548.1, WP_011056840.1	-	N.T.	N.T.	+	+	-	N.T.	+
Deinococcus-Thermus	Deinococcus geothermalis DSM 11300	WP_011529847.1	-	N.T.	N.T.	-	-	-	N.T.	-
Firmicutes	Geobacillus thermodenitrificans NG80-2	ABO67748.1, WP_008879881.1	-	-	pATC_EC_Gther	-	-	-	N.T.	-
	Moorella thermoacetica	ABC19357.1, WP_011392557.1	-	N.T.	N.T.	-	-	-	N.T.	-
	Heliobacterium modesticaldum Ice1	ABZ84822.1, WP_012283321.1	-	-	pATC_EC_Hmode	-	-	-	N.T.	-
	Anoxybacillus flavithermus WK1	WP_006317886.1	+	N.T.	N.T.	N.T.	N.T.	N.T.	N.T.	N.T.
Planctomycetes	Gemmata obscuriglobus UQM 2246	WP_010049453.1	-	N.T.	N.T.	-	-	-	N.T.	-
	Pirellula staleyi DSM 6068	WP_012911045.1	-	N.T.	N.T.	-	-	-	N.T.	-
	Planctomyces brasiliensis DSM 5305	WP_041399500.1	-	N.T.	N.T.	-	-	-	N.T.	-
Proteobacteria	Marichromatium purpuratum	WP_005223505.1	-	+	pATC_EC_Mpurp	N.T.	N.T.	N.T.	N.T.	+
	Lamprocystis purpurea	WP_040527635.1	-	-	pATC_EC_Lpurp	N.T.	N.T.	N.T.	N.T.	-
	Pelagibacter ubique HTCC1002	WP_011281768.1	-	N.T.	N.T.	-	-	-	-	-
	Jannaschia sp. CCS1	WP_011455057.1	-	-	pATC_EC_Janna	+	-	-	-	+
	Novosphingobium aromaticivorans DSM 12444	WP_011444079.1	-	-	pATC_EC_Novos	-	-	-	-	-
	Erythrobacter longus	WP_034962069.1	-	-	pATC_EC_Elong	N.T.	N.T.	N.T.	+	+
	Candidatus Jidaibacter acanthamoeba	WP_039458840.1	-	N.T.	N.T.	N.T.	N.T.	N.T.	-	-
	Roseobacter denitrificans	WP_044033137.1	-	-	pATC_EC_Rdeni	N.T.	N.T.	N.T.	-	-
	Porphyrobacter neustonensis	WP_068350622.1	-	N.T.	N.T.	N.T.	N.T.	N.T.	+	+
	Herminiimonas arsenicoxydans	WP_011870774.1	-	+	pATC_EC_Harse	-	-	-	N.T.	+
	Nitrosococcus oceani	WP_002810560.1	-	-	pATC_EC_Nocea	-	N.T.	N.T.	N.T.	-
	Chromobacterium violaceum ATCC 12472	WP_011137085.1	+	N.T.	N.T.	N.T.	N.T.	N.T.	N.T.	N.T.
	Colwellia psychrerythraea 34H	WP_011044983.1	-	N.T.	N.T.	N.T.	N.T.	N.T.	N.T.	N.T.
	Methylobacillus flagellatus KT	WP_011479842.1	-	N.T.	N.T.	N.T.	N.T.	N.T.	N.T.	N.T.
	Pantoea ananatis LMG 20103	WP_013026734.1	+	N.T.	N.T.	N.T.	N.T.	N.T.	N.T.	N.T.
Protozoa	Plasmodium falciparum UGT5.1	EWC76322.1	-	-	pATC_EC_Pfalc	N.T.	N.T.	N.T.	N.T.	-
Spirochaetes	Treponema denticola ATCC 35405	WP_002678768.1	-	N.T.	N.T.	-	-	-	N.T.	-
Verrucomicrobia	Verrucomicrobium spinosum	WP_009965977.1	-	N.T.	N.T.	+	N.T.	N.T.	N.T.	+
	Methylacidiphilum infernorum V4	WP_012464304.1	-	-	pATC_EC_Minfe	+	-	-	N.T.	+
