# Supplementary material for: Cellular assays identify barriers impeding iron-sulfur enzyme activity in a non-native prokaryotic host
Source: eLife. 2022 Mar 4;11:e70936. doi: 10.7554/eLife.70936 (PMC8896826; doi:10.7554/eLife.70936)
Supplement: Supplementary file 8. [file elife-70936-supp8.xlsx]

## Sheet: Sheet5
Supplementary File 8. Strains and plasmids used
Strain or plasmid	Relevant genotype or characteristics	Reference	Source
E. coli strains
DH5α	Cloning strain		Lab collection
NCM3722	Expression strain		Lab collection
MG1655	Parental strain		Lab collection
MG1655 MVA+	Parental strain containing MVA cassette	This study, Loiseau et al., 2007
MG1655 ΔnadA	nadA knockout strain	This study, Ollagnier-de Choudens et al., 2005
MG1655 MVA+ ΔispG	ispG knockout strain, deriving from MG1655 MVA+	This study, Loiseau et al., 2007
Complementation experiments
pBbS2k (pNadA, pIspG, pIspD)	BglBrick plasmid (pBb). Kanamycin resistence, SC101 origin (low copy), Tet promoter	Lee et al., 2011	Lab collection
pNadA	BglBrick plasmid (pBb). Kanamycin resistence, SC101 origin (low copy), Tet promoter nadA (see Tables S1&S4 for orthologs)	This study
pIspG	BglBrick plasmid (pBb). Kanamycin resistence, SC101 origin (low copy), Tet promoter ispG (see Tables S1&S4 for orthologs)	This study
pIspD	BglBrick plasmid (pBb). Kanamycin resistence, SC101 origin (low copy), Tet promoter ispD (see Table S1 for orthologs)	This study
Activation experiments
pBbA5a	BglBrick plasmid (pBb). Ampicillin resistence, p15A origin (medium copy), lacUV5 promoter	Lee et al., 2011	Lab collection
pBbA5a-sufBCDSU (pBsSUF)	pBbA5a derivative (see Table S5)	This study
pBbA5a-sufABCDSE (pEcSUF)	pBbA5a derivative (see Table S5)	This study
pBbA5a-ykuP-yutM	pBbA5a derivative (see Table S5)	This study
pATC_Bsub_yutM	pBbA5a derivative (see Table S5)	This study
pEC_Bsub_ykuP	pBbA5a derivative (see Table S5)	This study
pEC_Bsub_ykuN	pBbA5a derivative (see Table S5)	This study
pATC_EC_Synecho	pBbA5a derivative (see Table S5)	This study
pEC_Synecho_isiB	pBbA5a derivative (see Table S5)	This study
pEC_Synecho_petF	pBbA5a derivative (see Table S5)	This study
pATC_EC_Scatt	pBbA5a derivative (see Table S5)	This study
pEC_Scatt_fdx123	pBbA5a derivative (see Table S5)	This study
pEC_Scatt_fdx1	pBbA5a derivative (see Table S5)	This study
pEC_Scatt_fdx2	pBbA5a derivative (see Table S5)	This study
pEC_Scatt_fdx3	pBbA5a derivative (see Table S5)	This study
pATC_EC_Rsph	pBbA5a derivative (see Table S5)	This study
pEC_RsphFdx1	pBbA5a derivative (see Table S5)	This study
pEC_RsphFdx2	pBbA5a derivative (see Table S5)	This study
pEC_RsphFdx3	pBbA5a derivative (see Table S5)	This study
pEC_RsphFdx4	pBbA5a derivative (see Table S5)	This study
pEC_RsphFld	pBbA5a derivative (see Table S5)	This study
pATC_EC_Mferr	pBbA5a derivative (see Table S5)	This study
pATC_EC_Scoel	pBbA5a derivative (see Table S5)	This study
pATC_EC_Cster	pBbA5a derivative (see Table S5)	This study
pATC_EC_Cakaj	pBbA5a derivative (see Table S5)	This study
pATC_EC_Dhafn	pBbA5a derivative (see Table S5)	This study
pATC_EC_Ngrac	pBbA5a derivative (see Table S5)	This study
pATC_EC_Ipall	pBbA5a derivative (see Table S5)	This study
pATC_EC_Avino	pBbA5a derivative (see Table S5)	This study
pATC_EC_Jdeni	pBbA5a derivative (see Table S5)	This study
pATC_EC_Npunc	pBbA5a derivative (see Table S5)	This study
pATC_EC_Cyano	pBbA5a derivative (see Table S5)	This study
pATC_EC_Cwats	pBbA5a derivative (see Table S5)	This study
pATC_EC_Gther	pBbA5a derivative (see Table S5)	This study
pATC_EC_Hmode	pBbA5a derivative (see Table S5)	This study
pATC_EC_Mpurp	pBbA5a derivative (see Table S5)	This study
pATC_EC_Lpurp	pBbA5a derivative (see Table S5)	This study
pATC_EC_Janna	pBbA5a derivative (see Table S5)	This study
pATC_EC_Novos	pBbA5a derivative (see Table S5)	This study
pATC_EC_Elong	pBbA5a derivative (see Table S5)	This study
pATC_EC_Rdeni	pBbA5a derivative (see Table S5)	This study
pATC_EC_Harse	pBbA5a derivative (see Table S5)	This study
pATC_EC_Nocea	pBbA5a derivative (see Table S5)	This study
pATC_EC_Pfalc	pBbA5a derivative (see Table S5)	This study
pATC_EC_Minfe	pBbA5a derivative (see Table S5)	This study
Purification experiments
pET22-NadA (pETNadA22) NadA23	pET22 derivative carrying the nadA of Dictyoglomus thermophilmum, cloned by XbaI/XhoI sites	This study
pET22-NadA (pETNadA21) NadA42	pET22 derivative carrying the nadA of Desulfurispirillum indicum, cloned by NdeI/XhoI sites	This study
pET6H-IspG (pETIspG45) IspGA6	pET-6His derivative carrying the ispG of Thermotoga maritima, cloned by EcoRI/XhoI sites	This study
pET6H-IspG (pETIspG40) IspGE1	pET-6His derivative carrying the ispG of Symbiobacterum thermophilum, cloned by EcoRI/XhoI sites	This study
TsrM experiments
pBbS2c	BglBrick plasmid (pBb). Chloramphenicol resistance, SC101 origin (low copy), Tet promoter	Lee et al., 2011	Lab collection
pBbA5k	BglBrick plasmid (pBb). Kanamycin resistence, SC101 origin (low copy), lacUV5 promoter	Lee et al., 2011	Lab collection
pTsrM	pBbA5k derivative encoding codon-optimized sequence of S. laurentii TsrM	This study
pTsrM_Scatt3Fd	pTsrM with S. cattleya fdx1, fdx2, fdx3 genes inserted as multicistronic operon into BamHI/XhoI digestion site	This study
pTsrM_Fdx1	pTsrM with S. cattleya fdx1 inserted as bicistronic operon into BamHI/XhoI digestion site	This study
pTsrM_Fdx2	pTsrM with S. cattleya fdx2 inserted as bicistronic operon into BamHI/XhoI digestion site	This study
pTsrM_Fdx3	pTsrM with S. cattleya fdx3 inserted as bicistronic operon into BamHI/XhoI digestion site	This study
pBbS2c-BtuCEDFB	pBbS2c derivative encoding E. coli btu genes for cobalamin import	This study, after Lanz et al. 2018
Oligonucleotides	Sequence (5' - 3')
pBbS2k FW	AAACCTTCGATTCCGACCTCATTA
pBbS2k RV	CAAAACCCGTACCCTAGGTATAAA
pBbA5a FW	TTTACACTTTATGCTTCCGG
pBbA5a RV	TCAGATTTCGTGATGCTTGT
pETNadA22 FW	cctctagaaggagatatacatATGACCATTCAGGAGAAGATTCAG
pETNadA22 RV	ggtgctcgagCAAGTTAAGCATGCGCTCGATAG
pETNadA21 FW	tatacatATGACCATGTCCATCCAGGAAAAG
pETNadA21 RV	ggtgctcgagGGCGTTACGGGGGATTGC
pETIspG45 FW	actGAATTCATGCGTAAATCTGTTAAAGTTGGTAAAG
pETIspG45 RV	acgctcgagTTAACGTTCAACTTCTTCCAGCAG
pETIspG40 FW	actGAATTCATGATCGAACGCCGTAAGACC
pETIspG40 RV	acgctcgagTTAGCGCTCCTCATGGCG
GB200718-btuCED.f	cagtgatagagaaaagaattcaaaagatc AGGAGG ATACCATGCTGACACTTGCCC
GB200718-btuCED.r	agtgacttagccaTCAGATGGTCGAAATCAGCA
GB200718-btuF.f	ttcgaccatctgaTGGCTAAGTCACTGTTCAGGG
GB200718-btuF.r	agcttttttaatcaTCAATCTACCTGTGAAAGCGCA
GB200718-btuB.f	cacaggtagattgaTGATTAAAAAAGCTTCGCTGCTGA
GB200718-btuB.r	ggagatccttactcgagtttggatcTCAGAAGGTGTAGCTGCCAG
GB200718-btu.pls.f	CTGGCAGCTACACCTTCTGAgatccaaactcgagtaaggatctcc
GB200718-btu.pls.r	GGGCAAGTGTCAGCATGGTAT CCTCCT gatcttttgaattcttttctctatcactg
GB112816-sufBS.ins.f	gcggataacaatttcagaattcaaaagatctTTTGGAGGTATAGATatgGCTGCTTCAAC
GB112816-sufBS.ins.r	tggagatccttactcgagTTAGGATCCTTAACCGATAGAACCTTCCATTTCGAAC
GB112816-sufBS.pl.f	GTTCGAAATGGAAGGTTCTATCGGTTAA GGATCCTAActcgagtaaggatctcca
GB112816-sufBS.pl.r	GTTGAAGCAGCcatATCTATACCTCCAAAagatcttttgaattctgaaattgttatccgc
Frw_ScattFd1	CTAGAGCAGATCTATGACATACGTTATCGCTCAACCGT
Rev_ScattFd1	CTCGAGAAAGGATCCCTATCCATTCTGCGGTGGGAGGG
Frw_ScattFd2	CTAGAGCAGATCTATGTCAGATGCGACCGGCGAAG
Rev_ScattFd2	CTCGAGAAAGGATCCTTACGCTGCATCGGGTCCGTAAAC
Frw_ScattFd3	CTAGAGCAGATCTATGACCGTCCGGGTTTCAG
Rev_ScattFd3	CTAGAGCCTCGAGTTATGCGTCATGCACGG
